# Supplementary material for: Identification of TIMP1-induced dysregulation of epithelial-mesenchymal transition as a key pathway in inflammatory bowel disease and small intestinal neuroendocrine tumors shared pathogenesis
Source: Front Genet. 2024 Aug 21;15:1376123. doi: 10.3389/fgene.2024.1376123 (PMC11371700; doi:10.3389/fgene.2024.1376123)
Supplement: Supplementary file 7 [file Table7.xlsx]

## Sheet: GSEA_UC
GENE SET ENRICHMENT ANALYSIS - UC
Pathway	Size	Matches	ES	NES	P-value	Q-value	Link
REACTOME PATHWAYS
REACTOME_COMPLEMENT_CASCADE	115	62	0.71	2.1	0	0.028281	https://www.gsea-msigdb.org/gsea/msigdb/human/REACTOME_COMPLEMENT_CASCADE
REACTOME_INTEGRIN_SIGNALING	27	27	0.65	1.92	0	0.034565	https://www.gsea-msigdb.org/gsea/msigdb/human/REACTOME_INTEGRIN_SIGNALING
REACTOME_SURFACTANT_METABOLISM	30	24	0.63	1.93	0	0.035014	https://www.gsea-msigdb.org/gsea/msigdb/human/REACTOME_SURFACTANT_METABOLISM
REACTOME_BINDING_AND_UPTAKE_OF_LIGANDS_BY_SCAVENGER_RECEPTORS	98	47	0.66	1.91	0	0.035194	https://www.gsea-msigdb.org/gsea/msigdb/human/REACTOME_BINDING_AND_UPTAKE_OF_LIGANDS_BY_SCAVENGER_RECEPTORS
REACTOME_ECM_PROTEOGLYCANS	76	75	0.61	1.9	0	0.03541	https://www.gsea-msigdb.org/gsea/msigdb/human/REACTOME_ECM_PROTEOGLYCANS
REACTOME_SCAVENGING_OF_HEME_FROM_PLASMA	69	19	0.75	1.88	0	0.0363	https://www.gsea-msigdb.org/gsea/msigdb/human/REACTOME_SCAVENGING_OF_HEME_FROM_PLASMA
REACTOME_NEUTROPHIL_DEGRANULATION	478	460	0.51	1.94	0	0.03681	https://www.gsea-msigdb.org/gsea/msigdb/human/REACTOME_NEUTROPHIL_DEGRANULATION
REACTOME_UNFOLDED_PROTEIN_RESPONSE_UPR	93	90	0.63	1.9	0	0.037034	https://www.gsea-msigdb.org/gsea/msigdb/human/REACTOME_UNFOLDED_PROTEIN_RESPONSE_UPR
REACTOME_DEGRADATION_OF_THE_EXTRACELLULAR_MATRIX	140	139	0.55	1.9	0	0.037109	https://www.gsea-msigdb.org/gsea/msigdb/human/REACTOME_DEGRADATION_OF_THE_EXTRACELLULAR_MATRIX
REACTOME_EXTRACELLULAR_MATRIX_ORGANIZATION	300	298	0.55	1.91	0	0.03713	https://www.gsea-msigdb.org/gsea/msigdb/human/REACTOME_EXTRACELLULAR_MATRIX_ORGANIZATION
REACTOME_REGULATION_OF_INSULIN_LIKE_GROWTH_FACTOR_IGF_TRANSPORT_AND_UPTAKE_BY_INSULIN_LIKE_GROWTH_FACTOR_BINDING_PROTEINS_IGFBPS	124	119	0.56	1.92	0	0.037218	https://www.gsea-msigdb.org/gsea/msigdb/human/REACTOME_REGULATION_OF_INSULIN_LIKE_GROWTH_FACTOR_IGF_TRANSPORT_AND_UPTAKE_BY_INSULIN_LIKE_GROWTH_FACTOR_BINDING_PROTEINS_IGFBPS
REACTOME_DECTIN_2_FAMILY	26	23	0.69	1.88	0.0020492	0.037836	https://www.gsea-msigdb.org/gsea/msigdb/human/REACTOME_DECTIN_2_FAMILY
REACTOME_INTERLEUKIN_1_FAMILY_SIGNALING	152	146	0.58	1.86	0	0.037993	https://www.gsea-msigdb.org/gsea/msigdb/human/REACTOME_INTERLEUKIN_1_FAMILY_SIGNALING
REACTOME_MET_ACTIVATES_PTK2_SIGNALING	30	30	0.75	1.87	0.0019881	0.0381	https://www.gsea-msigdb.org/gsea/msigdb/human/REACTOME_MET_ACTIVATES_PTK2_SIGNALING
REACTOME_REGULATION_OF_KIT_SIGNALING	16	16	0.67	1.86	0.002	0.038128	https://www.gsea-msigdb.org/gsea/msigdb/human/REACTOME_REGULATION_OF_KIT_SIGNALING
REACTOME_PLATELET_ACTIVATION_SIGNALING_AND_AGGREGATION	261	252	0.45	1.86	0	0.038172	https://www.gsea-msigdb.org/gsea/msigdb/human/REACTOME_PLATELET_ACTIVATION_SIGNALING_AND_AGGREGATION
REACTOME_SIGNALING_BY_SCF_KIT	43	42	0.56	1.86	0.0077369	0.038663	https://www.gsea-msigdb.org/gsea/msigdb/human/REACTOME_SIGNALING_BY_SCF_KIT
REACTOME_CHEMOKINE_RECEPTORS_BIND_CHEMOKINES	58	54	0.73	1.91	0	0.038743	https://www.gsea-msigdb.org/gsea/msigdb/human/REACTOME_CHEMOKINE_RECEPTORS_BIND_CHEMOKINES
REACTOME_COLLAGEN_FORMATION	90	90	0.65	1.86	0.004065	0.039199	https://www.gsea-msigdb.org/gsea/msigdb/human/REACTOME_COLLAGEN_FORMATION
REACTOME_ROLE_OF_LAT2_NTAL_LAB_ON_CALCIUM_MOBILIZATION	71	24	0.69	1.89	0.0059172	0.039256	https://www.gsea-msigdb.org/gsea/msigdb/human/REACTOME_ROLE_OF_LAT2_NTAL_LAB_ON_CALCIUM_MOBILIZATION
REACTOME_TNFR2_NON_CANONICAL_NF_KB_PATHWAY	101	97	0.64	1.88	0.0038314	0.03964	https://www.gsea-msigdb.org/gsea/msigdb/human/REACTOME_TNFR2_NON_CANONICAL_NF_KB_PATHWAY
REACTOME_MET_PROMOTES_CELL_MOTILITY	41	41	0.65	1.86	0.0019493	0.039728	https://www.gsea-msigdb.org/gsea/msigdb/human/REACTOME_MET_PROMOTES_CELL_MOTILITY
REACTOME_FCERI_MEDIATED_CA_2_MOBILIZATION	86	39	0.64	1.86	0.0038314	0.039852	https://www.gsea-msigdb.org/gsea/msigdb/human/REACTOME_FCERI_MEDIATED_CA_2_MOBILIZATION
REACTOME_ROS_AND_RNS_PRODUCTION_IN_PHAGOCYTES	36	36	0.64	1.89	0.0079523	0.040047	https://www.gsea-msigdb.org/gsea/msigdb/human/REACTOME_ROS_AND_RNS_PRODUCTION_IN_PHAGOCYTES
REACTOME_CREATION_OF_C4_AND_C2_ACTIVATORS	71	22	0.77	1.94	0.0019841	0.040738	https://www.gsea-msigdb.org/gsea/msigdb/human/REACTOME_CREATION_OF_C4_AND_C2_ACTIVATORS
REACTOME_NUCLEAR_SIGNALING_BY_ERBB4	32	32	0.55	1.86	0.0020408	0.041074	https://www.gsea-msigdb.org/gsea/msigdb/human/REACTOME_NUCLEAR_SIGNALING_BY_ERBB4
REACTOME_INTERFERON_ALPHA_BETA_SIGNALING	78	77	0.59	1.85	0.0076482	0.042025	https://www.gsea-msigdb.org/gsea/msigdb/human/REACTOME_INTERFERON_ALPHA_BETA_SIGNALING
REACTOME_FCGR_ACTIVATION	69	19	0.84	1.86	0	0.042717	https://www.gsea-msigdb.org/gsea/msigdb/human/REACTOME_FCGR_ACTIVATION
REACTOME_SIGNALING_BY_THE_B_CELL_RECEPTOR_BCR	166	116	0.65	1.84	0	0.043748	https://www.gsea-msigdb.org/gsea/msigdb/human/REACTOME_SIGNALING_BY_THE_B_CELL_RECEPTOR_BCR
REACTOME_AMINO_ACID_TRANSPORT_ACROSS_THE_PLASMA_MEMBRANE	33	32	0.58	1.84	0.0019531	0.044142	https://www.gsea-msigdb.org/gsea/msigdb/human/REACTOME_AMINO_ACID_TRANSPORT_ACROSS_THE_PLASMA_MEMBRANE
REACTOME_INTERLEUKIN_4_AND_INTERLEUKIN_13_SIGNALING	111	109	0.61	1.94	0	0.044249	https://www.gsea-msigdb.org/gsea/msigdb/human/REACTOME_INTERLEUKIN_4_AND_INTERLEUKIN_13_SIGNALING
REACTOME_RHO_GTPASES_ACTIVATE_NADPH_OXIDASES	24	24	0.69	1.95	0.0040404	0.046461	https://www.gsea-msigdb.org/gsea/msigdb/human/REACTOME_RHO_GTPASES_ACTIVATE_NADPH_OXIDASES
REACTOME_FCGR3A_MEDIATED_IL10_SYNTHESIS	95	45	0.56	1.83	0.0039063	0.048091	https://www.gsea-msigdb.org/gsea/msigdb/human/REACTOME_FCGR3A_MEDIATED_IL10_SYNTHESIS
REACTOME_NA_CL_DEPENDENT_NEUROTRANSMITTER_TRANSPORTERS	19	19	0.62	1.83	0.0038835	0.048309	https://www.gsea-msigdb.org/gsea/msigdb/human/REACTOME_NA_CL_DEPENDENT_NEUROTRANSMITTER_TRANSPORTERS
REACTOME_ANTIGEN_ACTIVATES_B_CELL_RECEPTOR_BCR_LEADING_TO_GENERATION_OF_SECOND_MESSENGERS	86	39	0.7	1.83	0.0019724	0.048991	https://www.gsea-msigdb.org/gsea/msigdb/human/REACTOME_ANTIGEN_ACTIVATES_B_CELL_RECEPTOR_BCR_LEADING_TO_GENERATION_OF_SECOND_MESSENGERS
REACTOME_CELL_SURFACE_INTERACTIONS_AT_THE_VASCULAR_WALL	194	143	0.55	1.96	0	0.04902	https://www.gsea-msigdb.org/gsea/msigdb/human/REACTOME_CELL_SURFACE_INTERACTIONS_AT_THE_VASCULAR_WALL
REACTOME_IRE1ALPHA_ACTIVATES_CHAPERONES	50	47	0.71	1.81	0.0020408	0.052718	https://www.gsea-msigdb.org/gsea/msigdb/human/REACTOME_IRE1ALPHA_ACTIVATES_CHAPERONES
REACTOME_C_TYPE_LECTIN_RECEPTORS_CLRS	140	133	0.57	1.81	0.0077973	0.052746	https://www.gsea-msigdb.org/gsea/msigdb/human/REACTOME_C_TYPE_LECTIN_RECEPTORS_CLRS
REACTOME_INTEGRIN_CELL_SURFACE_INTERACTIONS	85	84	0.65	1.82	0	0.053329	https://www.gsea-msigdb.org/gsea/msigdb/human/REACTOME_INTEGRIN_CELL_SURFACE_INTERACTIONS
REACTOME_COLLAGEN_DEGRADATION	64	64	0.65	1.81	0.0020534	0.055497	https://www.gsea-msigdb.org/gsea/msigdb/human/REACTOME_COLLAGEN_DEGRADATION
REACTOME_SIGNALING_BY_INTERLEUKINS	474	446	0.54	1.96	0	0.059928	https://www.gsea-msigdb.org/gsea/msigdb/human/REACTOME_SIGNALING_BY_INTERLEUKINS
REACTOME_INITIAL_TRIGGERING_OF_COMPLEMENT	80	28	0.77	1.98	0.0020161	0.063295	https://www.gsea-msigdb.org/gsea/msigdb/human/REACTOME_INITIAL_TRIGGERING_OF_COMPLEMENT
REACTOME_ASSEMBLY_OF_COLLAGEN_FIBRILS_AND_OTHER_MULTIMERIC_STRUCTURES	61	61	0.67	1.79	0.010309	0.064703	https://www.gsea-msigdb.org/gsea/msigdb/human/REACTOME_ASSEMBLY_OF_COLLAGEN_FIBRILS_AND_OTHER_MULTIMERIC_STRUCTURES
REACTOME_RESPONSE_TO_ELEVATED_PLATELET_CYTOSOLIC_CA2	132	125	0.51	2	0	0.070028	https://www.gsea-msigdb.org/gsea/msigdb/human/REACTOME_RESPONSE_TO_ELEVATED_PLATELET_CYTOSOLIC_CA2
REACTOME_ANTIGEN_PROCESSING_CROSS_PRESENTATION	106	102	0.66	1.78	0.001938	0.070365	https://www.gsea-msigdb.org/gsea/msigdb/human/REACTOME_ANTIGEN_PROCESSING_CROSS_PRESENTATION
REACTOME_SYNTHESIS_SECRETION_AND_DEACYLATION_OF_GHRELIN	19	18	0.61	1.78	0.002045	0.070831	https://www.gsea-msigdb.org/gsea/msigdb/human/REACTOME_SYNTHESIS_SECRETION_AND_DEACYLATION_OF_GHRELIN
REACTOME_PLATELET_AGGREGATION_PLUG_FORMATION	39	38	0.56	1.78	0	0.071016	https://www.gsea-msigdb.org/gsea/msigdb/human/REACTOME_PLATELET_AGGREGATION_PLUG_FORMATION
REACTOME_MATURATION_OF_SARS_COV_2_SPIKE_PROTEIN	37	37	0.61	1.78	0.0039216	0.071141	https://www.gsea-msigdb.org/gsea/msigdb/human/REACTOME_MATURATION_OF_SARS_COV_2_SPIKE_PROTEIN
REACTOME_COLLAGEN_BIOSYNTHESIS_AND_MODIFYING_ENZYMES	67	67	0.64	1.77	0.010225	0.074096	https://www.gsea-msigdb.org/gsea/msigdb/human/REACTOME_COLLAGEN_BIOSYNTHESIS_AND_MODIFYING_ENZYMES
REACTOME_CARGO_CONCENTRATION_IN_THE_ER	33	33	0.58	1.77	0.003992	0.077085	https://www.gsea-msigdb.org/gsea/msigdb/human/REACTOME_CARGO_CONCENTRATION_IN_THE_ER
REACTOME_ASPARAGINE_N_LINKED_GLYCOSYLATION	305	296	0.47	1.76	0.003937	0.08132	https://www.gsea-msigdb.org/gsea/msigdb/human/REACTOME_ASPARAGINE_N_LINKED_GLYCOSYLATION
REACTOME_DEFECTIVE_C1GALT1C1_CAUSES_TNPS	17	15	0.66	1.76	0.004008	0.081911	https://www.gsea-msigdb.org/gsea/msigdb/human/REACTOME_DEFECTIVE_C1GALT1C1_CAUSES_TNPS
REACTOME_INTERLEUKIN_1_SIGNALING	114	109	0.61	1.75	0.0019724	0.084817	https://www.gsea-msigdb.org/gsea/msigdb/human/REACTOME_INTERLEUKIN_1_SIGNALING
REACTOME_ANTI_INFLAMMATORY_RESPONSE_FAVOURING_LEISHMANIA_PARASITE_INFECTION	134	84	0.49	1.75	0.0059172	0.086264	https://www.gsea-msigdb.org/gsea/msigdb/human/REACTOME_ANTI_INFLAMMATORY_RESPONSE_FAVOURING_LEISHMANIA_PARASITE_INFECTION
REACTOME_FCERI_MEDIATED_MAPK_ACTIVATION	87	40	0.59	1.73	0.0080645	0.08681	https://www.gsea-msigdb.org/gsea/msigdb/human/REACTOME_FCERI_MEDIATED_MAPK_ACTIVATION
REACTOME_LAMININ_INTERACTIONS	30	30	0.7	1.73	0.0099404	0.087346	https://www.gsea-msigdb.org/gsea/msigdb/human/REACTOME_LAMININ_INTERACTIONS
REACTOME_FC_EPSILON_RECEPTOR_FCERI_SIGNALING	186	135	0.56	1.73	0.0078431	0.08736	https://www.gsea-msigdb.org/gsea/msigdb/human/REACTOME_FC_EPSILON_RECEPTOR_FCERI_SIGNALING
REACTOME_TNFS_BIND_THEIR_PHYSIOLOGICAL_RECEPTORS	29	28	0.68	1.74	0.0040733	0.087514	https://www.gsea-msigdb.org/gsea/msigdb/human/REACTOME_TNFS_BIND_THEIR_PHYSIOLOGICAL_RECEPTORS
REACTOME_HYALURONAN_METABOLISM	17	17	0.57	1.73	0.011673	0.087615	https://www.gsea-msigdb.org/gsea/msigdb/human/REACTOME_HYALURONAN_METABOLISM
REACTOME_TOLL_LIKE_RECEPTOR_CASCADES	166	161	0.48	1.73	0	0.088148	https://www.gsea-msigdb.org/gsea/msigdb/human/REACTOME_TOLL_LIKE_RECEPTOR_CASCADES
REACTOME_GASTRULATION	118	110	0.48	1.75	0.01306	0.088246	https://www.gsea-msigdb.org/gsea/msigdb/human/REACTOME_GASTRULATION
REACTOME_REGULATION_OF_SIGNALING_BY_CBL	22	22	0.61	1.74	0.0041237	0.088665	https://www.gsea-msigdb.org/gsea/msigdb/human/REACTOME_REGULATION_OF_SIGNALING_BY_CBL
REACTOME_ANTIMICROBIAL_PEPTIDES	99	67	0.53	1.74	0	0.088789	https://www.gsea-msigdb.org/gsea/msigdb/human/REACTOME_ANTIMICROBIAL_PEPTIDES
REACTOME_INTERFERON_GAMMA_SIGNALING	98	91	0.54	1.73	0.026104	0.088922	https://www.gsea-msigdb.org/gsea/msigdb/human/REACTOME_INTERFERON_GAMMA_SIGNALING
REACTOME_INTERFERON_SIGNALING	274	257	0.48	1.74	0.0057915	0.089544	https://www.gsea-msigdb.org/gsea/msigdb/human/REACTOME_INTERFERON_SIGNALING
REACTOME_INTERLEUKIN_10_SIGNALING	46	43	0.71	1.74	0.0081466	0.089709	https://www.gsea-msigdb.org/gsea/msigdb/human/REACTOME_INTERLEUKIN_10_SIGNALING
REACTOME_NON_INTEGRIN_MEMBRANE_ECM_INTERACTIONS	59	59	0.54	1.74	0.017647	0.089713	https://www.gsea-msigdb.org/gsea/msigdb/human/REACTOME_NON_INTEGRIN_MEMBRANE_ECM_INTERACTIONS
REACTOME_FORMATION_OF_PARAXIAL_MESODERM	69	64	0.64	1.74	0.01165	0.08982	https://www.gsea-msigdb.org/gsea/msigdb/human/REACTOME_FORMATION_OF_PARAXIAL_MESODERM
REACTOME_ABC_TRANSPORTER_DISORDERS	78	74	0.6	1.74	0.019455	0.090754	https://www.gsea-msigdb.org/gsea/msigdb/human/REACTOME_ABC_TRANSPORTER_DISORDERS
REACTOME_SIGNALING_BY_KIT_IN_DISEASE	20	20	0.62	1.71	0.021195	0.096757	https://www.gsea-msigdb.org/gsea/msigdb/human/REACTOME_SIGNALING_BY_KIT_IN_DISEASE
REACTOME_N_GLYCAN_TRIMMING_IN_THE_ER_AND_CALNEXIN_CALRETICULIN_CYCLE	35	34	0.57	1.71	0.006012	0.098025	https://www.gsea-msigdb.org/gsea/msigdb/human/REACTOME_N_GLYCAN_TRIMMING_IN_THE_ER_AND_CALNEXIN_CALRETICULIN_CYCLE
REACTOME_COLLAGEN_CHAIN_TRIMERIZATION	44	44	0.64	1.71	0.022449	0.098982	https://www.gsea-msigdb.org/gsea/msigdb/human/REACTOME_COLLAGEN_CHAIN_TRIMERIZATION
REACTOME_TERMINATION_OF_O_GLYCAN_BIOSYNTHESIS	23	21	0.62	1.71	0.025341	0.1029	https://www.gsea-msigdb.org/gsea/msigdb/human/REACTOME_TERMINATION_OF_O_GLYCAN_BIOSYNTHESIS
REACTOME_REGULATION_OF_TLR_BY_ENDOGENOUS_LIGAND	21	19	0.67	1.69	0.010204	0.10343	https://www.gsea-msigdb.org/gsea/msigdb/human/REACTOME_REGULATION_OF_TLR_BY_ENDOGENOUS_LIGAND
REACTOME_CTLA4_INHIBITORY_SIGNALING	21	21	0.55	1.7	0.015534	0.10345	https://www.gsea-msigdb.org/gsea/msigdb/human/REACTOME_CTLA4_INHIBITORY_SIGNALING
REACTOME_ACTIVATION_OF_MATRIX_METALLOPROTEINASES	33	32	0.61	1.7	0.013889	0.10373	https://www.gsea-msigdb.org/gsea/msigdb/human/REACTOME_ACTIVATION_OF_MATRIX_METALLOPROTEINASES
REACTOME_FCERI_MEDIATED_NF_KB_ACTIVATION	136	85	0.65	1.7	0.013619	0.10393	https://www.gsea-msigdb.org/gsea/msigdb/human/REACTOME_FCERI_MEDIATED_NF_KB_ACTIVATION
REACTOME_FCGAMMA_RECEPTOR_FCGR_DEPENDENT_PHAGOCYTOSIS	143	93	0.47	1.69	0.018182	0.10394	https://www.gsea-msigdb.org/gsea/msigdb/human/REACTOME_FCGAMMA_RECEPTOR_FCGR_DEPENDENT_PHAGOCYTOSIS
REACTOME_SOMITOGENESIS	55	52	0.71	1.7	0.015444	0.10441	https://www.gsea-msigdb.org/gsea/msigdb/human/REACTOME_SOMITOGENESIS
REACTOME_ER_TO_GOLGI_ANTEROGRADE_TRANSPORT	155	151	0.48	1.68	0.01006	0.10455	https://www.gsea-msigdb.org/gsea/msigdb/human/REACTOME_ER_TO_GOLGI_ANTEROGRADE_TRANSPORT
REACTOME_GLYCOSAMINOGLYCAN_METABOLISM	126	125	0.41	1.69	0.0019531	0.1046	https://www.gsea-msigdb.org/gsea/msigdb/human/REACTOME_GLYCOSAMINOGLYCAN_METABOLISM
REACTOME_TOLL_LIKE_RECEPTOR_TLR1_TLR2_CASCADE	115	112	0.47	1.7	0	0.10476	https://www.gsea-msigdb.org/gsea/msigdb/human/REACTOME_TOLL_LIKE_RECEPTOR_TLR1_TLR2_CASCADE
REACTOME_HEDGEHOG_OFF_STATE	113	110	0.5	1.69	0.039773	0.10496	https://www.gsea-msigdb.org/gsea/msigdb/human/REACTOME_HEDGEHOG_OFF_STATE
REACTOME_ANTIGEN_PRESENTATION_FOLDING_ASSEMBLY_AND_PEPTIDE_LOADING_OF_CLASS_I_MHC	29	29	0.65	1.7	0.015474	0.10511	https://www.gsea-msigdb.org/gsea/msigdb/human/REACTOME_ANTIGEN_PRESENTATION_FOLDING_ASSEMBLY_AND_PEPTIDE_LOADING_OF_CLASS_I_MHC
REACTOME_TRANSLATION_OF_SARS_COV_2_STRUCTURAL_PROTEINS	57	57	0.5	1.69	0.0097466	0.10518	https://www.gsea-msigdb.org/gsea/msigdb/human/REACTOME_TRANSLATION_OF_SARS_COV_2_STRUCTURAL_PROTEINS
REACTOME_NICOTINAMIDE_SALVAGING	19	17	0.58	1.68	0.01417	0.10518	https://www.gsea-msigdb.org/gsea/msigdb/human/REACTOME_NICOTINAMIDE_SALVAGING
REACTOME_CALNEXIN_CALRETICULIN_CYCLE	26	25	0.58	1.7	0.00818	0.10536	https://www.gsea-msigdb.org/gsea/msigdb/human/REACTOME_CALNEXIN_CALRETICULIN_CYCLE
REACTOME_COSTIMULATION_BY_THE_CD28_FAMILY	74	66	0.54	1.69	0.027132	0.10565	https://www.gsea-msigdb.org/gsea/msigdb/human/REACTOME_COSTIMULATION_BY_THE_CD28_FAMILY
REACTOME_PARASITE_INFECTION	116	66	0.53	1.7	0.027559	0.10583	https://www.gsea-msigdb.org/gsea/msigdb/human/REACTOME_PARASITE_INFECTION
REACTOME_IMMUNOREGULATORY_INTERACTIONS_BETWEEN_A_LYMPHOID_AND_A_NON_LYMPHOID_CELL	191	125	0.53	1.69	0.021869	0.10616	https://www.gsea-msigdb.org/gsea/msigdb/human/REACTOME_IMMUNOREGULATORY_INTERACTIONS_BETWEEN_A_LYMPHOID_AND_A_NON_LYMPHOID_CELL
REACTOME_SIGNALING_BY_MET	79	79	0.44	1.69	0.0018904	0.10668	https://www.gsea-msigdb.org/gsea/msigdb/human/REACTOME_SIGNALING_BY_MET
REACTOME_TRANSCRIPTIONAL_REGULATION_BY_RUNX2	120	115	0.53	1.68	0.023392	0.10685	https://www.gsea-msigdb.org/gsea/msigdb/human/REACTOME_TRANSCRIPTIONAL_REGULATION_BY_RUNX2
REACTOME_COPII_MEDIATED_VESICLE_TRANSPORT	68	67	0.53	1.67	0.0098232	0.10744	https://www.gsea-msigdb.org/gsea/msigdb/human/REACTOME_COPII_MEDIATED_VESICLE_TRANSPORT
REACTOME_DOWNSTREAM_SIGNALING_EVENTS_OF_B_CELL_RECEPTOR_BCR	81	78	0.64	1.68	0.011673	0.10746	https://www.gsea-msigdb.org/gsea/msigdb/human/REACTOME_DOWNSTREAM_SIGNALING_EVENTS_OF_B_CELL_RECEPTOR_BCR
REACTOME_ROLE_OF_PHOSPHOLIPIDS_IN_PHAGOCYTOSIS	82	32	0.56	1.68	0.029412	0.10761	https://www.gsea-msigdb.org/gsea/msigdb/human/REACTOME_ROLE_OF_PHOSPHOLIPIDS_IN_PHAGOCYTOSIS
REACTOME_TRANSPORT_TO_THE_GOLGI_AND_SUBSEQUENT_MODIFICATION	186	181	0.45	1.68	0.0078895	0.10782	https://www.gsea-msigdb.org/gsea/msigdb/human/REACTOME_TRANSPORT_TO_THE_GOLGI_AND_SUBSEQUENT_MODIFICATION
REACTOME_INTERLEUKIN_20_FAMILY_SIGNALING	26	25	0.58	1.68	0.01217	0.10846	https://www.gsea-msigdb.org/gsea/msigdb/human/REACTOME_INTERLEUKIN_20_FAMILY_SIGNALING
REACTOME_DETOXIFICATION_OF_REACTIVE_OXYGEN_SPECIES	37	36	0.57	1.67	0.010101	0.10963	https://www.gsea-msigdb.org/gsea/msigdb/human/REACTOME_DETOXIFICATION_OF_REACTIVE_OXYGEN_SPECIES
REACTOME_TRANSCRIPTIONAL_REGULATION_BY_RUNX3	96	92	0.54	1.67	0.028517	0.11071	https://www.gsea-msigdb.org/gsea/msigdb/human/REACTOME_TRANSCRIPTIONAL_REGULATION_BY_RUNX3
REACTOME_RUNX1_REGULATES_TRANSCRIPTION_OF_GENES_INVOLVED_IN_DIFFERENTIATION_OF_HSCS	129	66	0.65	1.67	0.036053	0.11115	https://www.gsea-msigdb.org/gsea/msigdb/human/REACTOME_RUNX1_REGULATES_TRANSCRIPTION_OF_GENES_INVOLVED_IN_DIFFERENTIATION_OF_HSCS
REACTOME_PCP_CE_PATHWAY	92	89	0.58	1.67	0.034682	0.11205	https://www.gsea-msigdb.org/gsea/msigdb/human/REACTOME_PCP_CE_PATHWAY
REACTOME_THE_ROLE_OF_NEF_IN_HIV_1_REPLICATION_AND_DISEASE_PATHOGENESIS	28	28	0.58	1.67	0.021611	0.11264	https://www.gsea-msigdb.org/gsea/msigdb/human/REACTOME_THE_ROLE_OF_NEF_IN_HIV_1_REPLICATION_AND_DISEASE_PATHOGENESIS
REACTOME_METABOLISM_OF_POLYAMINES	59	56	0.73	1.66	0.01165	0.11422	https://www.gsea-msigdb.org/gsea/msigdb/human/REACTOME_METABOLISM_OF_POLYAMINES
REACTOME_SYNDECAN_INTERACTIONS	27	27	0.59	1.66	0.024762	0.11756	https://www.gsea-msigdb.org/gsea/msigdb/human/REACTOME_SYNDECAN_INTERACTIONS
REACTOME_GLYCOLYSIS	74	72	0.54	1.65	0.023576	0.11811	https://www.gsea-msigdb.org/gsea/msigdb/human/REACTOME_GLYCOLYSIS
REACTOME_PEPTIDE_LIGAND_BINDING_RECEPTORS	198	186	0.43	1.64	0	0.11887	https://www.gsea-msigdb.org/gsea/msigdb/human/REACTOME_PEPTIDE_LIGAND_BINDING_RECEPTORS
REACTOME_SIGNALING_BY_CSF1_M_CSF_IN_MYELOID_CELLS	31	31	0.48	1.65	0.011364	0.11893	https://www.gsea-msigdb.org/gsea/msigdb/human/REACTOME_SIGNALING_BY_CSF1_M_CSF_IN_MYELOID_CELLS
REACTOME_SIGNALING_BY_HEDGEHOG	150	146	0.46	1.64	0.030829	0.11902	https://www.gsea-msigdb.org/gsea/msigdb/human/REACTOME_SIGNALING_BY_HEDGEHOG
REACTOME_ANCHORING_FIBRIL_FORMATION	15	15	0.72	1.64	0.018293	0.11921	https://www.gsea-msigdb.org/gsea/msigdb/human/REACTOME_ANCHORING_FIBRIL_FORMATION
REACTOME_LEISHMANIA_INFECTION	219	169	0.42	1.64	0.02004	0.11926	https://www.gsea-msigdb.org/gsea/msigdb/human/REACTOME_LEISHMANIA_INFECTION
REACTOME_ABC_FAMILY_PROTEINS_MEDIATED_TRANSPORT	103	98	0.49	1.64	0.038314	0.1195	https://www.gsea-msigdb.org/gsea/msigdb/human/REACTOME_ABC_FAMILY_PROTEINS_MEDIATED_TRANSPORT
REACTOME_TRANSCRIPTIONAL_REGULATION_BY_RUNX1	237	173	0.46	1.64	0.016886	0.11967	https://www.gsea-msigdb.org/gsea/msigdb/human/REACTOME_TRANSCRIPTIONAL_REGULATION_BY_RUNX1
REACTOME_INTERLEUKIN_12_FAMILY_SIGNALING	57	55	0.61	1.65	0.011742	0.1197	https://www.gsea-msigdb.org/gsea/msigdb/human/REACTOME_INTERLEUKIN_12_FAMILY_SIGNALING
REACTOME_CD28_CO_STIMULATION	33	33	0.55	1.64	0.027132	0.11983	https://www.gsea-msigdb.org/gsea/msigdb/human/REACTOME_CD28_CO_STIMULATION
REACTOME_GPVI_MEDIATED_ACTIVATION_CASCADE	35	34	0.57	1.65	0.043912	0.11995	https://www.gsea-msigdb.org/gsea/msigdb/human/REACTOME_GPVI_MEDIATED_ACTIVATION_CASCADE
REACTOME_LATE_SARS_COV_2_INFECTION_EVENTS	70	70	0.45	1.64	0.015656	0.12016	https://www.gsea-msigdb.org/gsea/msigdb/human/REACTOME_LATE_SARS_COV_2_INFECTION_EVENTS
REACTOME_MEIOSIS	118	56	0.48	1.65	0.010142	0.12038	https://www.gsea-msigdb.org/gsea/msigdb/human/REACTOME_MEIOSIS
REACTOME_BETA_CATENIN_INDEPENDENT_WNT_SIGNALING	146	143	0.47	1.65	0.020677	0.12047	https://www.gsea-msigdb.org/gsea/msigdb/human/REACTOME_BETA_CATENIN_INDEPENDENT_WNT_SIGNALING
REACTOME_GENERATION_OF_SECOND_MESSENGER_MOLECULES	39	30	0.65	1.65	0.033399	0.12057	https://www.gsea-msigdb.org/gsea/msigdb/human/REACTOME_GENERATION_OF_SECOND_MESSENGER_MOLECULES
REACTOME_CELL_JUNCTION_ORGANIZATION	117	107	0.41	1.64	0.013699	0.12061	https://www.gsea-msigdb.org/gsea/msigdb/human/REACTOME_CELL_JUNCTION_ORGANIZATION
REACTOME_INTERLEUKIN_3_INTERLEUKIN_5_AND_GM_CSF_SIGNALING	48	48	0.48	1.65	0.030303	0.12062	https://www.gsea-msigdb.org/gsea/msigdb/human/REACTOME_INTERLEUKIN_3_INTERLEUKIN_5_AND_GM_CSF_SIGNALING
REACTOME_MEIOTIC_RECOMBINATION	86	24	0.62	1.65	0.013861	0.12114	https://www.gsea-msigdb.org/gsea/msigdb/human/REACTOME_MEIOTIC_RECOMBINATION
REACTOME_CROSS_PRESENTATION_OF_SOLUBLE_EXOGENOUS_ANTIGENS_ENDOSOMES	50	46	0.76	1.65	0.015564	0.12151	https://www.gsea-msigdb.org/gsea/msigdb/human/REACTOME_CROSS_PRESENTATION_OF_SOLUBLE_EXOGENOUS_ANTIGENS_ENDOSOMES
REACTOME_G_ALPHA_I_SIGNALLING_EVENTS	314	294	0.38	1.65	0	0.12217	https://www.gsea-msigdb.org/gsea/msigdb/human/REACTOME_G_ALPHA_I_SIGNALLING_EVENTS
REACTOME_NCAM_SIGNALING_FOR_NEURITE_OUT_GROWTH	63	63	0.44	1.63	0.0059406	0.12218	https://www.gsea-msigdb.org/gsea/msigdb/human/REACTOME_NCAM_SIGNALING_FOR_NEURITE_OUT_GROWTH
REACTOME_HOST_INTERACTIONS_OF_HIV_FACTORS	131	125	0.6	1.63	0.03675	0.12226	https://www.gsea-msigdb.org/gsea/msigdb/human/REACTOME_HOST_INTERACTIONS_OF_HIV_FACTORS
REACTOME_BIOSYNTHESIS_OF_THE_N_GLYCAN_PRECURSOR_DOLICHOL_LIPID_LINKED_OLIGOSACCHARIDE_LLO_AND_TRANSFER_TO_A_NASCENT_PROTEIN	78	74	0.45	1.63	0.0080645	0.12362	https://www.gsea-msigdb.org/gsea/msigdb/human/REACTOME_BIOSYNTHESIS_OF_THE_N_GLYCAN_PRECURSOR_DOLICHOL_LIPID_LINKED_OLIGOSACCHARIDE_LLO_AND_TRANSFER_TO_A_NASCENT_PROTEIN
REACTOME_SIGNALING_BY_PDGF	58	58	0.5	1.63	0.034765	0.12561	https://www.gsea-msigdb.org/gsea/msigdb/human/REACTOME_SIGNALING_BY_PDGF
REACTOME_MAPK6_MAPK4_SIGNALING	93	87	0.53	1.63	0.051527	0.12659	https://www.gsea-msigdb.org/gsea/msigdb/human/REACTOME_MAPK6_MAPK4_SIGNALING
REACTOME_SYNTHESIS_OF_SUBSTRATES_IN_N_GLYCAN_BIOSYTHESIS	63	60	0.45	1.62	0.00818	0.12853	https://www.gsea-msigdb.org/gsea/msigdb/human/REACTOME_SYNTHESIS_OF_SUBSTRATES_IN_N_GLYCAN_BIOSYTHESIS
REACTOME_CLEC7A_DECTIN_1_SIGNALING	100	96	0.59	1.62	0.031809	0.1288	https://www.gsea-msigdb.org/gsea/msigdb/human/REACTOME_CLEC7A_DECTIN_1_SIGNALING
REACTOME_THE_ROLE_OF_GTSE1_IN_G2_M_PROGRESSION_AFTER_G2_CHECKPOINT	79	73	0.65	1.62	0.045802	0.1296	https://www.gsea-msigdb.org/gsea/msigdb/human/REACTOME_THE_ROLE_OF_GTSE1_IN_G2_M_PROGRESSION_AFTER_G2_CHECKPOINT
REACTOME_REGULATION_OF_RUNX2_EXPRESSION_AND_ACTIVITY	73	70	0.61	1.62	0.04466	0.13208	https://www.gsea-msigdb.org/gsea/msigdb/human/REACTOME_REGULATION_OF_RUNX2_EXPRESSION_AND_ACTIVITY
REACTOME_ELASTIC_FIBRE_FORMATION	44	43	0.55	1.62	0.023715	0.13304	https://www.gsea-msigdb.org/gsea/msigdb/human/REACTOME_ELASTIC_FIBRE_FORMATION
REACTOME_HEDGEHOG_LIGAND_BIOGENESIS	65	62	0.65	1.61	0.03876	0.13513	https://www.gsea-msigdb.org/gsea/msigdb/human/REACTOME_HEDGEHOG_LIGAND_BIOGENESIS
REACTOME_DISEASES_OF_IMMUNE_SYSTEM	31	31	0.58	1.61	0.040619	0.13623	https://www.gsea-msigdb.org/gsea/msigdb/human/REACTOME_DISEASES_OF_IMMUNE_SYSTEM
REACTOME_DISORDERS_OF_TRANSMEMBRANE_TRANSPORTERS	177	171	0.43	1.61	0.030476	0.14013	https://www.gsea-msigdb.org/gsea/msigdb/human/REACTOME_DISORDERS_OF_TRANSMEMBRANE_TRANSPORTERS
REACTOME_SIGNALING_BY_NOTCH4	82	80	0.56	1.6	0.03937	0.14469	https://www.gsea-msigdb.org/gsea/msigdb/human/REACTOME_SIGNALING_BY_NOTCH4
REACTOME_INTERLEUKIN_2_FAMILY_SIGNALING	44	44	0.53	1.6	0.045908	0.14511	https://www.gsea-msigdb.org/gsea/msigdb/human/REACTOME_INTERLEUKIN_2_FAMILY_SIGNALING
REACTOME_RESPONSE_OF_EIF2AK1_HRI_TO_HEME_DEFICIENCY	15	15	0.65	1.6	0.02947	0.14585	https://www.gsea-msigdb.org/gsea/msigdb/human/REACTOME_RESPONSE_OF_EIF2AK1_HRI_TO_HEME_DEFICIENCY
REACTOME_CONSTITUTIVE_SIGNALING_BY_ABERRANT_PI3K_IN_CANCER	78	77	0.4	1.6	0.0039063	0.14771	https://www.gsea-msigdb.org/gsea/msigdb/human/REACTOME_CONSTITUTIVE_SIGNALING_BY_ABERRANT_PI3K_IN_CANCER
REACTOME_MYD88_INDEPENDENT_TLR4_CASCADE	108	105	0.45	1.58	0.023529	0.15159	https://www.gsea-msigdb.org/gsea/msigdb/human/REACTOME_MYD88_INDEPENDENT_TLR4_CASCADE
REACTOME_DEGRADATION_OF_GLI1_BY_THE_PROTEASOME	60	57	0.63	1.59	0.061896	0.15212	https://www.gsea-msigdb.org/gsea/msigdb/human/REACTOME_DEGRADATION_OF_GLI1_BY_THE_PROTEASOME
REACTOME_IRAK4_DEFICIENCY_TLR2_4	18	18	0.67	1.59	0.031189	0.15226	https://www.gsea-msigdb.org/gsea/msigdb/human/REACTOME_IRAK4_DEFICIENCY_TLR2_4
REACTOME_COPI_MEDIATED_ANTEROGRADE_TRANSPORT	102	98	0.46	1.58	0.02454	0.15237	https://www.gsea-msigdb.org/gsea/msigdb/human/REACTOME_COPI_MEDIATED_ANTEROGRADE_TRANSPORT
REACTOME_ACYL_CHAIN_REMODELLING_OF_PG	18	17	0.51	1.59	0.030181	0.15239	https://www.gsea-msigdb.org/gsea/msigdb/human/REACTOME_ACYL_CHAIN_REMODELLING_OF_PG
REACTOME_CROSSLINKING_OF_COLLAGEN_FIBRILS	18	18	0.73	1.59	0.014523	0.15293	https://www.gsea-msigdb.org/gsea/msigdb/human/REACTOME_CROSSLINKING_OF_COLLAGEN_FIBRILS
REACTOME_REGULATION_OF_RUNX3_EXPRESSION_AND_ACTIVITY	55	53	0.67	1.59	0.047151	0.15296	https://www.gsea-msigdb.org/gsea/msigdb/human/REACTOME_REGULATION_OF_RUNX3_EXPRESSION_AND_ACTIVITY
REACTOME_TCR_SIGNALING	124	111	0.55	1.59	0.042969	0.1533	https://www.gsea-msigdb.org/gsea/msigdb/human/REACTOME_TCR_SIGNALING
REACTOME_SCAVENGING_BY_CLASS_A_RECEPTORS	19	19	0.6	1.59	0.039293	0.15339	https://www.gsea-msigdb.org/gsea/msigdb/human/REACTOME_SCAVENGING_BY_CLASS_A_RECEPTORS
REACTOME_ADHERENS_JUNCTIONS_INTERACTIONS	58	51	0.43	1.59	0.011628	0.15366	https://www.gsea-msigdb.org/gsea/msigdb/human/REACTOME_ADHERENS_JUNCTIONS_INTERACTIONS
REACTOME_REGULATION_OF_RAS_BY_GAPS	68	64	0.59	1.59	0.066163	0.15404	https://www.gsea-msigdb.org/gsea/msigdb/human/REACTOME_REGULATION_OF_RAS_BY_GAPS
REACTOME_PD_1_SIGNALING	28	20	0.71	1.59	0.026749	0.15457	https://www.gsea-msigdb.org/gsea/msigdb/human/REACTOME_PD_1_SIGNALING
REACTOME_SIGNALING_BY_NOTCH	246	173	0.43	1.58	0.027184	0.1551	https://www.gsea-msigdb.org/gsea/msigdb/human/REACTOME_SIGNALING_BY_NOTCH
REACTOME_AZATHIOPRINE_ADME	23	21	0.49	1.58	0.015936	0.15518	https://www.gsea-msigdb.org/gsea/msigdb/human/REACTOME_AZATHIOPRINE_ADME
REACTOME_UCH_PROTEINASES	102	82	0.58	1.58	0.054159	0.15651	https://www.gsea-msigdb.org/gsea/msigdb/human/REACTOME_UCH_PROTEINASES
REACTOME_GRB2_SOS_PROVIDES_LINKAGE_TO_MAPK_SIGNALING_FOR_INTEGRINS	15	15	0.61	1.58	0.042802	0.15744	https://www.gsea-msigdb.org/gsea/msigdb/human/REACTOME_GRB2_SOS_PROVIDES_LINKAGE_TO_MAPK_SIGNALING_FOR_INTEGRINS
REACTOME_TRANSLATION_OF_SARS_COV_1_STRUCTURAL_PROTEINS	29	29	0.52	1.58	0.037736	0.15745	https://www.gsea-msigdb.org/gsea/msigdb/human/REACTOME_TRANSLATION_OF_SARS_COV_1_STRUCTURAL_PROTEINS
REACTOME_DEGRADATION_OF_DVL	57	54	0.65	1.58	0.068571	0.15811	https://www.gsea-msigdb.org/gsea/msigdb/human/REACTOME_DEGRADATION_OF_DVL
REACTOME_DEFECTIVE_CFTR_CAUSES_CYSTIC_FIBROSIS	61	58	0.65	1.57	0.05501	0.15927	https://www.gsea-msigdb.org/gsea/msigdb/human/REACTOME_DEFECTIVE_CFTR_CAUSES_CYSTIC_FIBROSIS
REACTOME_INTERLEUKIN_6_FAMILY_SIGNALING	24	22	0.56	1.57	0.025591	0.15986	https://www.gsea-msigdb.org/gsea/msigdb/human/REACTOME_INTERLEUKIN_6_FAMILY_SIGNALING
REACTOME_PYROPTOSIS	27	25	0.54	1.57	0.02537	0.15999	https://www.gsea-msigdb.org/gsea/msigdb/human/REACTOME_PYROPTOSIS
REACTOME_METABOLISM_OF_CARBOHYDRATES	297	291	0.36	1.57	0.007619	0.16041	https://www.gsea-msigdb.org/gsea/msigdb/human/REACTOME_METABOLISM_OF_CARBOHYDRATES
REACTOME_CELL_CELL_COMMUNICATION	155	142	0.37	1.57	0.019724	0.16133	https://www.gsea-msigdb.org/gsea/msigdb/human/REACTOME_CELL_CELL_COMMUNICATION
REACTOME_CELL_EXTRACELLULAR_MATRIX_INTERACTIONS	18	18	0.63	1.57	0.058594	0.16171	https://www.gsea-msigdb.org/gsea/msigdb/human/REACTOME_CELL_EXTRACELLULAR_MATRIX_INTERACTIONS
REACTOME_DISEASES_OF_GLYCOSYLATION	143	137	0.37	1.57	0.0079365	0.1624	https://www.gsea-msigdb.org/gsea/msigdb/human/REACTOME_DISEASES_OF_GLYCOSYLATION
REACTOME_MAPK_FAMILY_SIGNALING_CASCADES	327	317	0.34	1.56	0.0038536	0.16256	https://www.gsea-msigdb.org/gsea/msigdb/human/REACTOME_MAPK_FAMILY_SIGNALING_CASCADES
REACTOME_NEGATIVE_REGULATION_OF_NOTCH4_SIGNALING	54	52	0.66	1.56	0.05642	0.16431	https://www.gsea-msigdb.org/gsea/msigdb/human/REACTOME_NEGATIVE_REGULATION_OF_NOTCH4_SIGNALING
REACTOME_DEGRADATION_OF_AXIN	55	52	0.66	1.56	0.058252	0.17041	https://www.gsea-msigdb.org/gsea/msigdb/human/REACTOME_DEGRADATION_OF_AXIN
REACTOME_ASYMMETRIC_LOCALIZATION_OF_PCP_PROTEINS	64	61	0.63	1.55	0.070175	0.17061	https://www.gsea-msigdb.org/gsea/msigdb/human/REACTOME_ASYMMETRIC_LOCALIZATION_OF_PCP_PROTEINS
REACTOME_STABILIZATION_OF_P53	57	53	0.66	1.55	0.06383	0.17063	https://www.gsea-msigdb.org/gsea/msigdb/human/REACTOME_STABILIZATION_OF_P53
REACTOME_CHONDROITIN_SULFATE_DERMATAN_SULFATE_METABOLISM	50	49	0.47	1.55	0.028226	0.17096	https://www.gsea-msigdb.org/gsea/msigdb/human/REACTOME_CHONDROITIN_SULFATE_DERMATAN_SULFATE_METABOLISM
REACTOME_INTERLEUKIN_12_SIGNALING	47	45	0.6	1.55	0.035225	0.17253	https://www.gsea-msigdb.org/gsea/msigdb/human/REACTOME_INTERLEUKIN_12_SIGNALING
REACTOME_NICOTINATE_METABOLISM	31	29	0.46	1.55	0.035363	0.17297	https://www.gsea-msigdb.org/gsea/msigdb/human/REACTOME_NICOTINATE_METABOLISM
REACTOME_NEF_MEDIATES_DOWN_MODULATION_OF_CELL_SURFACE_RECEPTORS_BY_RECRUITING_THEM_TO_CLATHRIN_ADAPTERS	21	21	0.52	1.55	0.033865	0.17298	https://www.gsea-msigdb.org/gsea/msigdb/human/REACTOME_NEF_MEDIATES_DOWN_MODULATION_OF_CELL_SURFACE_RECEPTORS_BY_RECRUITING_THEM_TO_CLATHRIN_ADAPTERS
REACTOME_SPHINGOLIPID_DE_NOVO_BIOSYNTHESIS	33	31	0.49	1.55	0.021318	0.17363	https://www.gsea-msigdb.org/gsea/msigdb/human/REACTOME_SPHINGOLIPID_DE_NOVO_BIOSYNTHESIS
REACTOME_NCAM1_INTERACTIONS	42	42	0.48	1.55	0.033597	0.1763	https://www.gsea-msigdb.org/gsea/msigdb/human/REACTOME_NCAM1_INTERACTIONS
REACTOME_G1_S_DNA_DAMAGE_CHECKPOINTS	68	64	0.62	1.54	0.072692	0.17663	https://www.gsea-msigdb.org/gsea/msigdb/human/REACTOME_G1_S_DNA_DAMAGE_CHECKPOINTS
REACTOME_DECTIN_1_MEDIATED_NONCANONICAL_NF_KB_SIGNALING	62	59	0.65	1.54	0.055336	0.17761	https://www.gsea-msigdb.org/gsea/msigdb/human/REACTOME_DECTIN_1_MEDIATED_NONCANONICAL_NF_KB_SIGNALING
REACTOME_DEFENSINS	54	24	0.51	1.54	0.038986	0.17817	https://www.gsea-msigdb.org/gsea/msigdb/human/REACTOME_DEFENSINS
REACTOME_REGULATION_OF_MRNA_STABILITY_BY_PROTEINS_THAT_BIND_AU_RICH_ELEMENTS	87	83	0.59	1.54	0.066148	0.17837	https://www.gsea-msigdb.org/gsea/msigdb/human/REACTOME_REGULATION_OF_MRNA_STABILITY_BY_PROTEINS_THAT_BIND_AU_RICH_ELEMENTS
REACTOME_HEDGEHOG_ON_STATE	86	82	0.52	1.54	0.085551	0.17849	https://www.gsea-msigdb.org/gsea/msigdb/human/REACTOME_HEDGEHOG_ON_STATE
REACTOME_APC_C_CDH1_MEDIATED_DEGRADATION_OF_CDC20_AND_OTHER_APC_C_CDH1_TARGETED_PROTEINS_IN_LATE_MITOSIS_EARLY_G1	74	71	0.65	1.54	0.071291	0.18088	https://www.gsea-msigdb.org/gsea/msigdb/human/REACTOME_APC_C_CDH1_MEDIATED_DEGRADATION_OF_CDC20_AND_OTHER_APC_C_CDH1_TARGETED_PROTEINS_IN_LATE_MITOSIS_EARLY_G1
REACTOME_SYNTHESIS_SECRETION_AND_INACTIVATION_OF_GLUCAGON_LIKE_PEPTIDE_1_GLP_1	21	20	0.49	1.53	0.044444	0.18629	https://www.gsea-msigdb.org/gsea/msigdb/human/REACTOME_SYNTHESIS_SECRETION_AND_INACTIVATION_OF_GLUCAGON_LIKE_PEPTIDE_1_GLP_1
REACTOME_SIGNALING_BY_VEGF	106	104	0.41	1.53	0.042553	0.18688	https://www.gsea-msigdb.org/gsea/msigdb/human/REACTOME_SIGNALING_BY_VEGF
REACTOME_CELLULAR_RESPONSE_TO_HYPOXIA	75	70	0.56	1.53	0.079696	0.18691	https://www.gsea-msigdb.org/gsea/msigdb/human/REACTOME_CELLULAR_RESPONSE_TO_HYPOXIA
REACTOME_P130CAS_LINKAGE_TO_MAPK_SIGNALING_FOR_INTEGRINS	15	15	0.58	1.53	0.05835	0.18699	https://www.gsea-msigdb.org/gsea/msigdb/human/REACTOME_P130CAS_LINKAGE_TO_MAPK_SIGNALING_FOR_INTEGRINS
REACTOME_REGULATION_OF_HSF1_MEDIATED_HEAT_SHOCK_RESPONSE	82	79	0.49	1.53	0.051383	0.18716	https://www.gsea-msigdb.org/gsea/msigdb/human/REACTOME_REGULATION_OF_HSF1_MEDIATED_HEAT_SHOCK_RESPONSE
REACTOME_COPI_DEPENDENT_GOLGI_TO_ER_RETROGRADE_TRAFFIC	100	95	0.45	1.53	0.072978	0.18958	https://www.gsea-msigdb.org/gsea/msigdb/human/REACTOME_COPI_DEPENDENT_GOLGI_TO_ER_RETROGRADE_TRAFFIC
REACTOME_RAF_INDEPENDENT_MAPK1_3_ACTIVATION	23	23	0.54	1.52	0.071154	0.19027	https://www.gsea-msigdb.org/gsea/msigdb/human/REACTOME_RAF_INDEPENDENT_MAPK1_3_ACTIVATION
REACTOME_BETA_DEFENSINS	44	17	0.53	1.52	0.039063	0.19275	https://www.gsea-msigdb.org/gsea/msigdb/human/REACTOME_BETA_DEFENSINS
REACTOME_DISEASES_OF_SIGNAL_TRANSDUCTION_BY_GROWTH_FACTOR_RECEPTORS_AND_SECOND_MESSENGERS	432	420	0.37	1.52	0.015686	0.19437	https://www.gsea-msigdb.org/gsea/msigdb/human/REACTOME_DISEASES_OF_SIGNAL_TRANSDUCTION_BY_GROWTH_FACTOR_RECEPTORS_AND_SECOND_MESSENGERS
REACTOME_PEPTIDE_HORMONE_METABOLISM	89	81	0.37	1.52	0.010331	0.19525	https://www.gsea-msigdb.org/gsea/msigdb/human/REACTOME_PEPTIDE_HORMONE_METABOLISM
REACTOME_REGULATION_OF_PTEN_STABILITY_AND_ACTIVITY	69	66	0.59	1.52	0.074951	0.19535	https://www.gsea-msigdb.org/gsea/msigdb/human/REACTOME_REGULATION_OF_PTEN_STABILITY_AND_ACTIVITY
REACTOME_GROWTH_HORMONE_RECEPTOR_SIGNALING	24	24	0.47	1.52	0.028571	0.19546	https://www.gsea-msigdb.org/gsea/msigdb/human/REACTOME_GROWTH_HORMONE_RECEPTOR_SIGNALING
REACTOME_AUF1_HNRNP_D0_BINDS_AND_DESTABILIZES_MRNA	55	51	0.67	1.52	0.068093	0.19616	https://www.gsea-msigdb.org/gsea/msigdb/human/REACTOME_AUF1_HNRNP_D0_BINDS_AND_DESTABILIZES_MRNA
REACTOME_METABOLISM_OF_FOLATE_AND_PTERINES	17	15	0.56	1.51	0.047525	0.19619	https://www.gsea-msigdb.org/gsea/msigdb/human/REACTOME_METABOLISM_OF_FOLATE_AND_PTERINES
REACTOME_DEFECTS_OF_CONTACT_ACTIVATION_SYSTEM_CAS_AND_KALLIKREIN_KININ_SYSTEM_KKS	16	15	0.62	1.51	0.058708	0.2057	https://www.gsea-msigdb.org/gsea/msigdb/human/REACTOME_DEFECTS_OF_CONTACT_ACTIVATION_SYSTEM_CAS_AND_KALLIKREIN_KININ_SYSTEM_KKS
REACTOME_MHC_CLASS_II_ANTIGEN_PRESENTATION	126	119	0.42	1.51	0.039139	0.20599	https://www.gsea-msigdb.org/gsea/msigdb/human/REACTOME_MHC_CLASS_II_ANTIGEN_PRESENTATION
IMMUNE SIGNATURE PATHWAYS
GSE29164_CD8_TCELL_VS_CD8_TCELL_AND_IL12_TREATED_MELANOMA_DAY7_DN	195	181	0.59	2.15	0	0.025563	https://www.gsea-msigdb.org/gsea/msigdb/human/geneset/GSE29164_CD8_TCELL_VS_CD8_TCELL_AND_IL12_TREATED_MELANOMA_DAY7_DN
GSE360_CTRL_VS_M_TUBERCULOSIS_DC_DN	200	190	0.61	2.1	0	0.03664	https://www.gsea-msigdb.org/gsea/msigdb/human/geneset/GSE360_CTRL_VS_M_TUBERCULOSIS_DC_DN
GSE18281_CORTICAL_VS_MEDULLARY_THYMOCYTE_UP	199	190	0.67	2.08	0	0.03238	https://www.gsea-msigdb.org/gsea/msigdb/human/geneset/GSE18281_CORTICAL_VS_MEDULLARY_THYMOCYTE_UP
GSE2405_0H_VS_3H_A_PHAGOCYTOPHILUM_STIM_NEUTROPHIL_UP	200	194	0.55	2.07	0.0018975	0.025137	https://www.gsea-msigdb.org/gsea/msigdb/human/geneset/GSE2405_0H_VS_3H_A_PHAGOCYTOPHILUM_STIM_NEUTROPHIL_UP
GSE36888_UNTREATED_VS_IL2_TREATED_STAT5_AB_KNOCKIN_TCELL_17H_UP	191	172	0.55	2.06	0	0.023859	https://www.gsea-msigdb.org/gsea/msigdb/human/geneset/GSE36888_UNTREATED_VS_IL2_TREATED_STAT5_AB_KNOCKIN_TCELL_17H_UP
GSE360_T_GONDII_VS_M_TUBERCULOSIS_DC_DN	199	191	0.54	2.05	0	0.023859	https://www.gsea-msigdb.org/gsea/msigdb/human/geneset/GSE360_T_GONDII_VS_M_TUBERCULOSIS_DC_DN
GSE29618_PDC_VS_MDC_DN	200	197	0.63	2.04	0	0.023615	https://www.gsea-msigdb.org/gsea/msigdb/human/geneset/GSE29618_PDC_VS_MDC_DN
GSE21546_UNSTIM_VS_ANTI_CD3_STIM_SAP1A_KO_AND_ELK1_KO_DP_THYMOCYTES_UP	189	172	0.5	2.03	0	0.023007	https://www.gsea-msigdb.org/gsea/msigdb/human/geneset/GSE21546_UNSTIM_VS_ANTI_CD3_STIM_SAP1A_KO_AND_ELK1_KO_DP_THYMOCYTES_UP
GSE22886_NAIVE_BCELL_VS_NEUTROPHIL_DN	200	186	0.64	2.03	0	0.02045	https://www.gsea-msigdb.org/gsea/msigdb/human/geneset/GSE22886_NAIVE_BCELL_VS_NEUTROPHIL_DN
GSE13411_IGM_MEMORY_BCELL_VS_PLASMA_CELL_DN	198	190	0.53	2.03	0	0.018746	https://www.gsea-msigdb.org/gsea/msigdb/human/geneset/GSE13411_IGM_MEMORY_BCELL_VS_PLASMA_CELL_DN
GSE42021_CD24HI_VS_CD24INT_TCONV_THYMUS_DN	200	195	0.53	2.03	0	0.019366	https://www.gsea-msigdb.org/gsea/msigdb/human/geneset/GSE42021_CD24HI_VS_CD24INT_TCONV_THYMUS_DN
GSE43863_NAIVE_VS_MEMORY_TH1_CD4_TCELL_D150_LCMV_UP	189	174	0.55	2.02	0	0.017894	https://www.gsea-msigdb.org/gsea/msigdb/human/geneset/GSE43863_NAIVE_VS_MEMORY_TH1_CD4_TCELL_D150_LCMV_UP
GSE12366_GC_BCELL_VS_PLASMA_CELL_DN	194	176	0.52	2.02	0	0.017173	https://www.gsea-msigdb.org/gsea/msigdb/human/geneset/GSE12366_GC_BCELL_VS_PLASMA_CELL_DN
GSE29618_PDC_VS_MDC_DAY7_FLU_VACCINE_DN	200	196	0.6	2.01	0	0.017164	https://www.gsea-msigdb.org/gsea/msigdb/human/geneset/GSE29618_PDC_VS_MDC_DAY7_FLU_VACCINE_DN
GSE2128_CTRL_VS_MIMETOPE_NEGATIVE_SELECTION_DP_THYMOCYTE_C57BL6_UP	191	181	0.47	2.01	0	0.016815	https://www.gsea-msigdb.org/gsea/msigdb/human/geneset/GSE2128_CTRL_VS_MIMETOPE_NEGATIVE_SELECTION_DP_THYMOCYTE_C57BL6_UP
GSE37533_UNTREATED_VS_PIOGLIZATONE_TREATED_CD4_TCELL_PPARG1_AND_FOXP3_TRASDUCED_UP	199	193	0.57	2.01	0	0.017788	https://www.gsea-msigdb.org/gsea/msigdb/human/geneset/GSE37533_UNTREATED_VS_PIOGLIZATONE_TREATED_CD4_TCELL_PPARG1_AND_FOXP3_TRASDUCED_UP
GSE46606_IRF4HIGH_VS_WT_CD40L_IL2_IL5_DAY3_STIMULATED_BCELL_DN	200	186	0.5	2	0	0.018345	https://www.gsea-msigdb.org/gsea/msigdb/human/geneset/GSE46606_IRF4HIGH_VS_WT_CD40L_IL2_IL5_DAY3_STIMULATED_BCELL_DN
GSE39864_WT_VS_GATA3_KO_TREG_UP	200	192	0.52	2	0	0.01761	https://www.gsea-msigdb.org/gsea/msigdb/human/geneset/GSE39864_WT_VS_GATA3_KO_TREG_UP
GSE36888_UNTREATED_VS_IL2_TREATED_TCELL_6H_UP	195	178	0.58	2	0	0.016773	https://www.gsea-msigdb.org/gsea/msigdb/human/geneset/GSE36888_UNTREATED_VS_IL2_TREATED_TCELL_6H_UP
GSE7509_DC_VS_MONOCYTE_DN	200	190	0.57	2	0	0.016445	https://www.gsea-msigdb.org/gsea/msigdb/human/geneset/GSE7509_DC_VS_MONOCYTE_DN
GSE360_L_DONOVANI_VS_M_TUBERCULOSIS_MAC_DN	199	196	0.57	1.99	0	0.016717	https://www.gsea-msigdb.org/gsea/msigdb/human/geneset/GSE360_L_DONOVANI_VS_M_TUBERCULOSIS_MAC_DN
GSE40273_EOS_KO_VS_WT_TREG_UP	200	188	0.56	1.99	0	0.018281	https://www.gsea-msigdb.org/gsea/msigdb/human/geneset/GSE40273_EOS_KO_VS_WT_TREG_UP
GSE1791_CTRL_VS_NEUROMEDINU_IN_T_CELL_LINE_3H_UP	188	172	0.52	1.99	0	0.017487	https://www.gsea-msigdb.org/gsea/msigdb/human/geneset/GSE1791_CTRL_VS_NEUROMEDINU_IN_T_CELL_LINE_3H_UP
GSE22886_NAIVE_CD4_TCELL_VS_NEUTROPHIL_DN	198	182	0.51	1.98	0	0.018959	https://www.gsea-msigdb.org/gsea/msigdb/human/geneset/GSE22886_NAIVE_CD4_TCELL_VS_NEUTROPHIL_DN
GSE3982_CTRL_VS_LPS_48H_DC_DN	200	185	0.57	1.98	0	0.018678	https://www.gsea-msigdb.org/gsea/msigdb/human/geneset/GSE3982_CTRL_VS_LPS_48H_DC_DN
GSE1740_UNSTIM_VS_IFNA_STIMULATED_MCSF_DERIVED_MACROPHAGE_DN	193	178	0.52	1.97	0	0.019402	https://www.gsea-msigdb.org/gsea/msigdb/human/geneset/GSE1740_UNSTIM_VS_IFNA_STIMULATED_MCSF_DERIVED_MACROPHAGE_DN
GSE360_HIGH_DOSE_B_MALAYI_VS_M_TUBERCULOSIS_DC_DN	200	192	0.6	1.97	0	0.020766	https://www.gsea-msigdb.org/gsea/msigdb/human/geneset/GSE360_HIGH_DOSE_B_MALAYI_VS_M_TUBERCULOSIS_DC_DN
GSE14000_UNSTIM_VS_4H_LPS_DC_TRANSLATED_RNA_DN	197	188	0.59	1.97	0.0019724	0.02045	https://www.gsea-msigdb.org/gsea/msigdb/human/geneset/GSE14000_UNSTIM_VS_4H_LPS_DC_TRANSLATED_RNA_DN
GSE22886_IGG_IGA_MEMORY_BCELL_VS_BM_PLASMA_CELL_DN	197	188	0.54	1.96	0	0.020098	https://www.gsea-msigdb.org/gsea/msigdb/human/geneset/GSE22886_IGG_IGA_MEMORY_BCELL_VS_BM_PLASMA_CELL_DN
GSE22935_WT_VS_MYD88_KO_MACROPHAGE_UP	200	196	0.58	1.96	0	0.020166	https://www.gsea-msigdb.org/gsea/msigdb/human/geneset/GSE22935_WT_VS_MYD88_KO_MACROPHAGE_UP
GSE43955_1H_VS_10H_ACT_CD4_TCELL_WITH_TGFB_IL6_DN	200	195	0.55	1.96	0	0.020121	https://www.gsea-msigdb.org/gsea/msigdb/human/geneset/GSE43955_1H_VS_10H_ACT_CD4_TCELL_WITH_TGFB_IL6_DN
GSE11961_FOLLICULAR_BCELL_VS_PLASMA_CELL_DAY7_UP	200	191	0.52	1.96	0	0.019918	https://www.gsea-msigdb.org/gsea/msigdb/human/geneset/GSE11961_FOLLICULAR_BCELL_VS_PLASMA_CELL_DAY7_UP
GSE29618_MONOCYTE_VS_PDC_DAY7_FLU_VACCINE_UP	200	194	0.57	1.96	0.0019763	0.020347	https://www.gsea-msigdb.org/gsea/msigdb/human/geneset/GSE29618_MONOCYTE_VS_PDC_DAY7_FLU_VACCINE_UP
GSE45365_NK_CELL_VS_CD11B_DC_DN	199	192	0.62	1.95	0	0.02015	https://www.gsea-msigdb.org/gsea/msigdb/human/geneset/GSE45365_NK_CELL_VS_CD11B_DC_DN
GSE36826_WT_VS_IL1R_KO_SKIN_STAPH_AUREUS_INF_DN	200	182	0.54	1.95	0	0.020353	https://www.gsea-msigdb.org/gsea/msigdb/human/geneset/GSE36826_WT_VS_IL1R_KO_SKIN_STAPH_AUREUS_INF_DN
GSE19888_CTRL_VS_TCELL_MEMBRANES_ACT_MAST_CELL_PRETREAT_A3R_INH_DN	200	188	0.61	1.95	0	0.020545	https://www.gsea-msigdb.org/gsea/msigdb/human/geneset/GSE19888_CTRL_VS_TCELL_MEMBRANES_ACT_MAST_CELL_PRETREAT_A3R_INH_DN
GSE19198_CTRL_VS_IL21_TREATED_TCELL_24H_UP	200	185	0.54	1.95	0	0.020635	https://www.gsea-msigdb.org/gsea/msigdb/human/geneset/GSE19198_CTRL_VS_IL21_TREATED_TCELL_24H_UP
GSE12366_PLASMA_CELL_VS_MEMORY_BCELL_UP	192	178	0.52	1.95	0	0.020271	https://www.gsea-msigdb.org/gsea/msigdb/human/geneset/GSE12366_PLASMA_CELL_VS_MEMORY_BCELL_UP
GSE7509_UNSTIM_VS_IFNA_STIM_IMMATURE_DC_DN	172	167	0.6	1.95	0	0.01997	https://www.gsea-msigdb.org/gsea/msigdb/human/geneset/GSE7509_UNSTIM_VS_IFNA_STIM_IMMATURE_DC_DN
GSE40685_TREG_VS_FOXP3_KO_TREG_PRECURSOR_UP	199	183	0.6	1.95	0	0.019598	https://www.gsea-msigdb.org/gsea/msigdb/human/geneset/GSE40685_TREG_VS_FOXP3_KO_TREG_PRECURSOR_UP
GSE22886_DAY0_VS_DAY1_MONOCYTE_IN_CULTURE_DN	200	193	0.64	1.95	0	0.019245	https://www.gsea-msigdb.org/gsea/msigdb/human/geneset/GSE22886_DAY0_VS_DAY1_MONOCYTE_IN_CULTURE_DN
GSE39382_IL3_VS_IL3_IL33_TREATED_MAST_CELL_DN	200	186	0.53	1.95	0.0019646	0.018949	https://www.gsea-msigdb.org/gsea/msigdb/human/geneset/GSE39382_IL3_VS_IL3_IL33_TREATED_MAST_CELL_DN
GSE29618_MONOCYTE_VS_PDC_UP	199	192	0.59	1.94	0.0039216	0.019182	https://www.gsea-msigdb.org/gsea/msigdb/human/geneset/GSE29618_MONOCYTE_VS_PDC_UP
GSE25123_WT_VS_PPARG_KO_MACROPHAGE_UP	199	186	0.56	1.94	0	0.019637	https://www.gsea-msigdb.org/gsea/msigdb/human/geneset/GSE25123_WT_VS_PPARG_KO_MACROPHAGE_UP
GSE29614_DAY3_VS_DAY7_TIV_FLU_VACCINE_PBMC_DN	191	174	0.64	1.94	0.0019763	0.019201	https://www.gsea-msigdb.org/gsea/msigdb/human/geneset/GSE29614_DAY3_VS_DAY7_TIV_FLU_VACCINE_PBMC_DN
GSE13411_PLASMA_CELL_VS_MEMORY_BCELL_UP	198	176	0.59	1.94	0.0019685	0.018894	https://www.gsea-msigdb.org/gsea/msigdb/human/geneset/GSE13411_PLASMA_CELL_VS_MEMORY_BCELL_UP
GSE360_HIGH_DOSE_B_MALAYI_VS_M_TUBERCULOSIS_MAC_DN	199	190	0.54	1.94	0	0.018674	https://www.gsea-msigdb.org/gsea/msigdb/human/geneset/GSE360_HIGH_DOSE_B_MALAYI_VS_M_TUBERCULOSIS_MAC_DN
GSE45365_NK_CELL_VS_CD8A_DC_UP	200	193	0.5	1.94	0	0.018711	https://www.gsea-msigdb.org/gsea/msigdb/human/geneset/GSE45365_NK_CELL_VS_CD8A_DC_UP
GSE8835_CD4_VS_CD8_TCELL_CLL_PATIENT_UP	200	190	0.53	1.94	0.0019305	0.018329	https://www.gsea-msigdb.org/gsea/msigdb/human/geneset/GSE8835_CD4_VS_CD8_TCELL_CLL_PATIENT_UP
GSE19888_ADENOSINE_A3R_INH_VS_ACT_WITH_INHIBITOR_PRETREATMENT_IN_MAST_CELL_UP	200	184	0.59	1.94	0	0.018473	https://www.gsea-msigdb.org/gsea/msigdb/human/geneset/GSE19888_ADENOSINE_A3R_INH_VS_ACT_WITH_INHIBITOR_PRETREATMENT_IN_MAST_CELL_UP
GSE24634_IL4_VS_CTRL_TREATED_NAIVE_CD4_TCELL_DAY3_DN	200	191	0.61	1.94	0	0.018646	https://www.gsea-msigdb.org/gsea/msigdb/human/geneset/GSE24634_IL4_VS_CTRL_TREATED_NAIVE_CD4_TCELL_DAY3_DN
GSE21379_WT_VS_SAP_KO_TFH_CD4_TCELL_UP	200	187	0.5	1.93	0	0.01855	https://www.gsea-msigdb.org/gsea/msigdb/human/geneset/GSE21379_WT_VS_SAP_KO_TFH_CD4_TCELL_UP
GSE22886_NAIVE_BCELL_VS_BM_PLASMA_CELL_DN	198	191	0.6	1.93	0	0.0191	https://www.gsea-msigdb.org/gsea/msigdb/human/geneset/GSE22886_NAIVE_BCELL_VS_BM_PLASMA_CELL_DN
GSE19198_6H_VS_24H_IL21_TREATED_TCELL_UP	199	189	0.51	1.93	0	0.018841	https://www.gsea-msigdb.org/gsea/msigdb/human/geneset/GSE19198_6H_VS_24H_IL21_TREATED_TCELL_UP
GSE34156_NOD2_LIGAND_VS_TLR1_TLR2_LIGAND_6H_TREATED_MONOCYTE_DN	197	188	0.53	1.93	0.0018553	0.018808	https://www.gsea-msigdb.org/gsea/msigdb/human/geneset/GSE34156_NOD2_LIGAND_VS_TLR1_TLR2_LIGAND_6H_TREATED_MONOCYTE_DN
GSE32034_LY6C_HIGH_VS_LOW_MONOCYTE_UP	200	193	0.46	1.93	0	0.019111	https://www.gsea-msigdb.org/gsea/msigdb/human/geneset/GSE32034_LY6C_HIGH_VS_LOW_MONOCYTE_UP
GSE41176_UNSTIM_VS_ANTI_IGM_STIM_BCELL_1H_UP	197	195	0.58	1.93	0	0.019195	https://www.gsea-msigdb.org/gsea/msigdb/human/geneset/GSE41176_UNSTIM_VS_ANTI_IGM_STIM_BCELL_1H_UP
GSE42021_TREG_PLN_VS_CD24INT_TREG_THYMUS_DN	200	191	0.65	1.93	0.0019417	0.019246	https://www.gsea-msigdb.org/gsea/msigdb/human/geneset/GSE42021_TREG_PLN_VS_CD24INT_TREG_THYMUS_DN
GSE360_DC_VS_MAC_M_TUBERCULOSIS_UP	196	193	0.53	1.92	0	0.019295	https://www.gsea-msigdb.org/gsea/msigdb/human/geneset/GSE360_DC_VS_MAC_M_TUBERCULOSIS_UP
GSE360_L_DONOVANI_VS_M_TUBERCULOSIS_DC_DN	199	189	0.57	1.92	0	0.019683	https://www.gsea-msigdb.org/gsea/msigdb/human/geneset/GSE360_L_DONOVANI_VS_M_TUBERCULOSIS_DC_DN
GSE25088_ROSIGLITAZONE_VS_IL4_AND_ROSIGLITAZONE_STIM_STAT6_KO_MACROPHAGE_DAY10_DN	198	187	0.64	1.92	0	0.019528	https://www.gsea-msigdb.org/gsea/msigdb/human/geneset/GSE25088_ROSIGLITAZONE_VS_IL4_AND_ROSIGLITAZONE_STIM_STAT6_KO_MACROPHAGE_DAY10_DN
GSE19888_ADENOSINE_A3R_INH_PRETREAT_AND_ACT_BY_A3R_VS_TCELL_MEMBRANES_ACT_MAST_CELL_UP	200	185	0.68	1.92	0	0.019268	https://www.gsea-msigdb.org/gsea/msigdb/human/geneset/GSE19888_ADENOSINE_A3R_INH_PRETREAT_AND_ACT_BY_A3R_VS_TCELL_MEMBRANES_ACT_MAST_CELL_UP
GSE43863_TFH_VS_LY6C_INT_CXCR5POS_MEMORY_CD4_TCELL_UP	199	187	0.51	1.92	0	0.019017	https://www.gsea-msigdb.org/gsea/msigdb/human/geneset/GSE43863_TFH_VS_LY6C_INT_CXCR5POS_MEMORY_CD4_TCELL_UP
GSE25088_IL4_VS_IL4_AND_ROSIGLITAZONE_STIM_STAT6_KO_MACROPHAGE_DAY10_DN	197	189	0.57	1.92	0	0.019598	https://www.gsea-msigdb.org/gsea/msigdb/human/geneset/GSE25088_IL4_VS_IL4_AND_ROSIGLITAZONE_STIM_STAT6_KO_MACROPHAGE_DAY10_DN
GSE2706_UNSTIM_VS_8H_R848_DC_DN	197	184	0.54	1.92	0.0019342	0.019297	https://www.gsea-msigdb.org/gsea/msigdb/human/geneset/GSE2706_UNSTIM_VS_8H_R848_DC_DN
GSE28737_FOLLICULAR_VS_MARGINAL_ZONE_BCELL_BCL6_HET_DN	200	182	0.45	1.92	0	0.019443	https://www.gsea-msigdb.org/gsea/msigdb/human/geneset/GSE28737_FOLLICULAR_VS_MARGINAL_ZONE_BCELL_BCL6_HET_DN
GSE7218_UNSTIM_VS_ANTIGEN_STIM_THROUGH_IGG_BCELL_DN	170	160	0.61	1.92	0	0.019306	https://www.gsea-msigdb.org/gsea/msigdb/human/geneset/GSE7218_UNSTIM_VS_ANTIGEN_STIM_THROUGH_IGG_BCELL_DN
GSE42088_UNINF_VS_LEISHMANIA_INF_DC_24H_DN	199	195	0.6	1.92	0	0.019373	https://www.gsea-msigdb.org/gsea/msigdb/human/geneset/GSE42088_UNINF_VS_LEISHMANIA_INF_DC_24H_DN
GSE35825_UNTREATED_VS_IFNA_STIM_MACROPHAGE_DN	169	159	0.51	1.92	0	0.019141	https://www.gsea-msigdb.org/gsea/msigdb/human/geneset/GSE35825_UNTREATED_VS_IFNA_STIM_MACROPHAGE_DN
GSE34156_UNTREATED_VS_24H_NOD2_LIGAND_TREATED_MONOCYTE_DN	200	192	0.52	1.92	0	0.018892	https://www.gsea-msigdb.org/gsea/msigdb/human/geneset/GSE34156_UNTREATED_VS_24H_NOD2_LIGAND_TREATED_MONOCYTE_DN
GSE9960_GRAM_NEG_VS_GRAM_POS_SEPSIS_PBMC_UP	198	185	0.59	1.92	0	0.018818	https://www.gsea-msigdb.org/gsea/msigdb/human/geneset/GSE9960_GRAM_NEG_VS_GRAM_POS_SEPSIS_PBMC_UP
GSE25123_IL4_VS_IL4_AND_ROSIGLITAZONE_STIM_PPARG_KO_MACROPHAGE_DAY10_DN	195	187	0.55	1.91	0	0.018699	https://www.gsea-msigdb.org/gsea/msigdb/human/geneset/GSE25123_IL4_VS_IL4_AND_ROSIGLITAZONE_STIM_PPARG_KO_MACROPHAGE_DAY10_DN
GSE2706_2H_VS_8H_R848_AND_LPS_STIM_DC_DN	198	185	0.55	1.91	0.002004	0.019633	https://www.gsea-msigdb.org/gsea/msigdb/human/geneset/GSE2706_2H_VS_8H_R848_AND_LPS_STIM_DC_DN
GSE26030_TH1_VS_TH17_DAY5_POST_POLARIZATION_UP	200	183	0.56	1.91	0.0019685	0.019921	https://www.gsea-msigdb.org/gsea/msigdb/human/geneset/GSE26030_TH1_VS_TH17_DAY5_POST_POLARIZATION_UP
GSE42021_TCONV_PLN_VS_CD24HI_TCONV_THYMUS_UP	200	191	0.6	1.91	0	0.019723	https://www.gsea-msigdb.org/gsea/msigdb/human/geneset/GSE42021_TCONV_PLN_VS_CD24HI_TCONV_THYMUS_UP
GSE45365_WT_VS_IFNAR_KO_CD8A_DC_DN	199	190	0.56	1.91	0	0.019621	https://www.gsea-msigdb.org/gsea/msigdb/human/geneset/GSE45365_WT_VS_IFNAR_KO_CD8A_DC_DN
GSE17301_ACD3_ACD28_VS_ACD3_ACD28_AND_IFNA5_STIM_CD8_TCELL_DN	200	188	0.59	1.91	0.001938	0.019565	https://www.gsea-msigdb.org/gsea/msigdb/human/geneset/GSE17301_ACD3_ACD28_VS_ACD3_ACD28_AND_IFNA5_STIM_CD8_TCELL_DN
GSE19888_ADENOSINE_A3R_ACT_VS_TCELL_MEMBRANES_ACT_IN_MAST_CELL_UP	200	187	0.56	1.91	0.0019084	0.019598	https://www.gsea-msigdb.org/gsea/msigdb/human/geneset/GSE19888_ADENOSINE_A3R_ACT_VS_TCELL_MEMBRANES_ACT_IN_MAST_CELL_UP
GSE10325_LUPUS_CD4_TCELL_VS_LUPUS_MYELOID_DN	200	191	0.57	1.9	0.0038314	0.019652	https://www.gsea-msigdb.org/gsea/msigdb/human/geneset/GSE10325_LUPUS_CD4_TCELL_VS_LUPUS_MYELOID_DN
GSE19888_ADENOSINE_A3R_INH_VS_TCELL_MEMBRANES_ACT_MAST_CELL_UP	200	184	0.52	1.9	0.0019455	0.019577	https://www.gsea-msigdb.org/gsea/msigdb/human/geneset/GSE19888_ADENOSINE_A3R_INH_VS_TCELL_MEMBRANES_ACT_MAST_CELL_UP
GSE7218_IGM_VS_IGG_SIGNAL_THGOUGH_ANTIGEN_BCELL_DN	170	162	0.58	1.9	0	0.020051	https://www.gsea-msigdb.org/gsea/msigdb/human/geneset/GSE7218_IGM_VS_IGG_SIGNAL_THGOUGH_ANTIGEN_BCELL_DN
GSE22886_NAIVE_CD8_TCELL_VS_MONOCYTE_DN	200	193	0.58	1.9	0.0039063	0.020014	https://www.gsea-msigdb.org/gsea/msigdb/human/geneset/GSE22886_NAIVE_CD8_TCELL_VS_MONOCYTE_DN
GSE1112_HY_CD8AB_VS_HY_CD8AA_THYMOCYTE_RTOC_CULTURE_UP	193	177	0.48	1.9	0	0.020163	https://www.gsea-msigdb.org/gsea/msigdb/human/geneset/GSE1112_HY_CD8AB_VS_HY_CD8AA_THYMOCYTE_RTOC_CULTURE_UP
GSE13484_UNSTIM_VS_YF17D_VACCINE_STIM_PBMC_DN	200	193	0.6	1.9	0	0.019943	https://www.gsea-msigdb.org/gsea/msigdb/human/geneset/GSE13484_UNSTIM_VS_YF17D_VACCINE_STIM_PBMC_DN
GSE21670_STAT3_KO_VS_WT_CD4_TCELL_UP	197	192	0.54	1.9	0	0.019909	https://www.gsea-msigdb.org/gsea/msigdb/human/geneset/GSE21670_STAT3_KO_VS_WT_CD4_TCELL_UP
GSE2405_S_AUREUS_VS_A_PHAGOCYTOPHILUM_NEUTROPHIL_UP	200	187	0.48	1.9	0.0018657	0.020906	https://www.gsea-msigdb.org/gsea/msigdb/human/geneset/GSE2405_S_AUREUS_VS_A_PHAGOCYTOPHILUM_NEUTROPHIL_UP
GSE17721_0.5H_VS_24H_CPG_BMDC_DN	200	188	0.5	1.89	0	0.02096	https://www.gsea-msigdb.org/gsea/msigdb/human/geneset/GSE17721_0.5H_VS_24H_CPG_BMDC_DN
GSE42088_UNINF_VS_LEISHMANIA_INF_DC_2H_UP	200	193	0.58	1.89	0	0.02167	https://www.gsea-msigdb.org/gsea/msigdb/human/geneset/GSE42088_UNINF_VS_LEISHMANIA_INF_DC_2H_UP
GSE9601_NFKB_INHIBITOR_VS_PI3K_INHIBITOR_TREATED_HCMV_INF_MONOCYTE_DN	200	191	0.52	1.89	0.0019569	0.021504	https://www.gsea-msigdb.org/gsea/msigdb/human/geneset/GSE9601_NFKB_INHIBITOR_VS_PI3K_INHIBITOR_TREATED_HCMV_INF_MONOCYTE_DN
GSE360_LOW_DOSE_B_MALAYI_VS_M_TUBERCULOSIS_DC_DN	199	191	0.58	1.89	0	0.021511	https://www.gsea-msigdb.org/gsea/msigdb/human/geneset/GSE360_LOW_DOSE_B_MALAYI_VS_M_TUBERCULOSIS_DC_DN
GSE21774_CD62L_POS_CD56_BRIGHT_VS_CD62L_NEG_CD56_DIM_NK_CELL_UP	200	186	0.52	1.89	0	0.021349	https://www.gsea-msigdb.org/gsea/msigdb/human/geneset/GSE21774_CD62L_POS_CD56_BRIGHT_VS_CD62L_NEG_CD56_DIM_NK_CELL_UP
GSE22025_UNTREATED_VS_TGFB1_TREATED_CD4_TCELL_UP	199	194	0.48	1.89	0	0.021154	https://www.gsea-msigdb.org/gsea/msigdb/human/geneset/GSE22025_UNTREATED_VS_TGFB1_TREATED_CD4_TCELL_UP
GSE22886_IGM_MEMORY_BCELL_VS_BM_PLASMA_CELL_DN	199	192	0.51	1.89	0	0.021513	https://www.gsea-msigdb.org/gsea/msigdb/human/geneset/GSE22886_IGM_MEMORY_BCELL_VS_BM_PLASMA_CELL_DN
GSE18791_CTRL_VS_NEWCASTLE_VIRUS_DC_8H_DN	196	186	0.58	1.89	0.0019268	0.021429	https://www.gsea-msigdb.org/gsea/msigdb/human/geneset/GSE18791_CTRL_VS_NEWCASTLE_VIRUS_DC_8H_DN
GSE6269_FLU_VS_STAPH_AUREUS_INF_PBMC_DN	167	157	0.54	1.89	0.0019646	0.021311	https://www.gsea-msigdb.org/gsea/msigdb/human/geneset/GSE6269_FLU_VS_STAPH_AUREUS_INF_PBMC_DN
GSE17721_CTRL_VS_LPS_2H_BMDC_DN	200	193	0.45	1.89	0	0.021196	https://www.gsea-msigdb.org/gsea/msigdb/human/geneset/GSE17721_CTRL_VS_LPS_2H_BMDC_DN
GSE46606_IRF4_KO_VS_WT_UNSTIM_BCELL_DN	200	186	0.52	1.89	0	0.021013	https://www.gsea-msigdb.org/gsea/msigdb/human/geneset/GSE46606_IRF4_KO_VS_WT_UNSTIM_BCELL_DN
GSE2197_CPG_DNA_VS_UNTREATED_IN_DC_UP	200	185	0.49	1.89	0	0.020868	https://www.gsea-msigdb.org/gsea/msigdb/human/geneset/GSE2197_CPG_DNA_VS_UNTREATED_IN_DC_UP
GSE21360_TERTIARY_VS_QUATERNARY_MEMORY_CD8_TCELL_DN	177	168	0.56	1.88	0	0.021225	https://www.gsea-msigdb.org/gsea/msigdb/human/geneset/GSE21360_TERTIARY_VS_QUATERNARY_MEMORY_CD8_TCELL_DN
GSE29618_BCELL_VS_PDC_DN	198	189	0.52	1.88	0	0.021388	https://www.gsea-msigdb.org/gsea/msigdb/human/geneset/GSE29618_BCELL_VS_PDC_DN
GSE7509_UNSTIM_VS_FCGRIIB_STIM_DC_DN	175	167	0.58	1.88	0.0019724	0.02175	https://www.gsea-msigdb.org/gsea/msigdb/human/geneset/GSE7509_UNSTIM_VS_FCGRIIB_STIM_DC_DN
KAECH_DAY15_EFF_VS_MEMORY_CD8_TCELL_UP	200	193	0.47	1.88	0	0.021536	https://www.gsea-msigdb.org/gsea/msigdb/human/geneset/KAECH_DAY15_EFF_VS_MEMORY_CD8_TCELL_UP
GSE24142_EARLY_THYMIC_PROGENITOR_VS_DN2_THYMOCYTE_FETAL_UP	200	190	0.45	1.88	0.0019048	0.021377	https://www.gsea-msigdb.org/gsea/msigdb/human/geneset/GSE24142_EARLY_THYMIC_PROGENITOR_VS_DN2_THYMOCYTE_FETAL_UP
GSE22886_NAIVE_CD4_TCELL_VS_MONOCYTE_DN	200	193	0.57	1.88	0.0039063	0.021204	https://www.gsea-msigdb.org/gsea/msigdb/human/geneset/GSE22886_NAIVE_CD4_TCELL_VS_MONOCYTE_DN
GSE22886_CTRL_VS_LPS_24H_DC_DN	200	179	0.62	1.88	0	0.021197	https://www.gsea-msigdb.org/gsea/msigdb/human/geneset/GSE22886_CTRL_VS_LPS_24H_DC_DN
GSE3982_NEUTROPHIL_VS_BCELL_UP	200	191	0.46	1.88	0	0.021222	https://www.gsea-msigdb.org/gsea/msigdb/human/geneset/GSE3982_NEUTROPHIL_VS_BCELL_UP
GSE42021_CD24HI_VS_CD24LOW_TCONV_THYMUS_DN	199	190	0.63	1.88	0.0020202	0.021135	https://www.gsea-msigdb.org/gsea/msigdb/human/geneset/GSE42021_CD24HI_VS_CD24LOW_TCONV_THYMUS_DN
GSE6259_FLT3L_INDUCED_DEC205_POS_DC_VS_CD8_TCELL_DN	174	164	0.61	1.88	0	0.020987	https://www.gsea-msigdb.org/gsea/msigdb/human/geneset/GSE6259_FLT3L_INDUCED_DEC205_POS_DC_VS_CD8_TCELL_DN
GSE27859_MACROPHAGE_VS_DC_UP	168	158	0.52	1.88	0	0.02081	https://www.gsea-msigdb.org/gsea/msigdb/human/geneset/GSE27859_MACROPHAGE_VS_DC_UP
GSE7460_FOXP3_MUT_VS_WT_ACT_TCONV_UP	200	194	0.5	1.88	0	0.020869	https://www.gsea-msigdb.org/gsea/msigdb/human/geneset/GSE7460_FOXP3_MUT_VS_WT_ACT_TCONV_UP
GSE12845_IGD_NEG_BLOOD_VS_DARKZONE_GC_TONSIL_BCELL_UP	197	188	0.51	1.88	0	0.021018	https://www.gsea-msigdb.org/gsea/msigdb/human/geneset/GSE12845_IGD_NEG_BLOOD_VS_DARKZONE_GC_TONSIL_BCELL_UP
GSE29614_CTRL_VS_TIV_FLU_VACCINE_PBMC_2007_DN	187	169	0.49	1.88	0.0020534	0.021044	https://www.gsea-msigdb.org/gsea/msigdb/human/geneset/GSE29614_CTRL_VS_TIV_FLU_VACCINE_PBMC_2007_DN
GSE18281_SUBCAPSULAR_VS_CENTRAL_CORTICAL_REGION_OF_THYMUS_DN	200	185	0.63	1.88	0	0.021144	https://www.gsea-msigdb.org/gsea/msigdb/human/geneset/GSE18281_SUBCAPSULAR_VS_CENTRAL_CORTICAL_REGION_OF_THYMUS_DN
GSE17974_IL4_AND_ANTI_IL12_VS_UNTREATED_72H_ACT_CD4_TCELL_DN	195	187	0.53	1.87	0	0.021183	https://www.gsea-msigdb.org/gsea/msigdb/human/geneset/GSE17974_IL4_AND_ANTI_IL12_VS_UNTREATED_72H_ACT_CD4_TCELL_DN
GSE29618_BCELL_VS_MDC_DN	200	192	0.53	1.87	0	0.021325	https://www.gsea-msigdb.org/gsea/msigdb/human/geneset/GSE29618_BCELL_VS_MDC_DN
GSE37301_MULTIPOTENT_PROGENITOR_VS_GRAN_MONO_PROGENITOR_DN	200	190	0.56	1.87	0	0.021288	https://www.gsea-msigdb.org/gsea/msigdb/human/geneset/GSE37301_MULTIPOTENT_PROGENITOR_VS_GRAN_MONO_PROGENITOR_DN
GSE37534_UNTREATED_VS_PIOGLITAZONE_TREATED_CD4_TCELL_PPARG1_AND_FOXP3_TRASDUCED_DN	200	191	0.57	1.87	0.0038986	0.021164	https://www.gsea-msigdb.org/gsea/msigdb/human/geneset/GSE37534_UNTREATED_VS_PIOGLITAZONE_TREATED_CD4_TCELL_PPARG1_AND_FOXP3_TRASDUCED_DN
GSE9316_IL6_KO_VS_IFNG_KO_INVIVO_EXPANDED_CD4_TCELL_DN	200	187	0.6	1.87	0	0.021028	https://www.gsea-msigdb.org/gsea/msigdb/human/geneset/GSE9316_IL6_KO_VS_IFNG_KO_INVIVO_EXPANDED_CD4_TCELL_DN
GSE13411_NAIVE_BCELL_VS_PLASMA_CELL_DN	199	189	0.49	1.87	0	0.020995	https://www.gsea-msigdb.org/gsea/msigdb/human/geneset/GSE13411_NAIVE_BCELL_VS_PLASMA_CELL_DN
GSE5589_IL6_KO_VS_IL10_KO_LPS_AND_IL10_STIM_MACROPHAGE_45MIN_UP	200	192	0.46	1.87	0	0.020962	https://www.gsea-msigdb.org/gsea/msigdb/human/geneset/GSE5589_IL6_KO_VS_IL10_KO_LPS_AND_IL10_STIM_MACROPHAGE_45MIN_UP
GSE21360_NAIVE_VS_SECONDARY_MEMORY_CD8_TCELL_UP	183	177	0.54	1.87	0.0019724	0.020873	https://www.gsea-msigdb.org/gsea/msigdb/human/geneset/GSE21360_NAIVE_VS_SECONDARY_MEMORY_CD8_TCELL_UP
GSE36826_WT_VS_IL1R_KO_SKIN_DN	198	186	0.56	1.87	0	0.020981	https://www.gsea-msigdb.org/gsea/msigdb/human/geneset/GSE36826_WT_VS_IL1R_KO_SKIN_DN
GSE14000_UNSTIM_VS_16H_LPS_DC_TRANSLATED_RNA_DN	197	184	0.54	1.87	0	0.020811	https://www.gsea-msigdb.org/gsea/msigdb/human/geneset/GSE14000_UNSTIM_VS_16H_LPS_DC_TRANSLATED_RNA_DN
GSE13411_SWITCHED_MEMORY_BCELL_VS_PLASMA_CELL_DN	195	182	0.45	1.87	0	0.021316	https://www.gsea-msigdb.org/gsea/msigdb/human/geneset/GSE13411_SWITCHED_MEMORY_BCELL_VS_PLASMA_CELL_DN
GSE2706_2H_VS_8H_R848_STIM_DC_DN	196	182	0.49	1.87	0	0.021268	https://www.gsea-msigdb.org/gsea/msigdb/human/geneset/GSE2706_2H_VS_8H_R848_STIM_DC_DN
GSE19401_NAIVE_VS_IMMUNIZED_MOUSE_PLN_FOLLICULAR_DC_UP	199	197	0.56	1.87	0	0.021384	https://www.gsea-msigdb.org/gsea/msigdb/human/geneset/GSE19401_NAIVE_VS_IMMUNIZED_MOUSE_PLN_FOLLICULAR_DC_UP
GSE2770_IL12_AND_TGFB_VS_IL4_TREATED_ACT_CD4_TCELL_48H_DN	196	178	0.45	1.87	0.0019048	0.021336	https://www.gsea-msigdb.org/gsea/msigdb/human/geneset/GSE2770_IL12_AND_TGFB_VS_IL4_TREATED_ACT_CD4_TCELL_48H_DN
GSE22140_GERMFREE_VS_SPF_MOUSE_CD4_TCELL_UP	199	193	0.59	1.87	0	0.021263	https://www.gsea-msigdb.org/gsea/msigdb/human/geneset/GSE22140_GERMFREE_VS_SPF_MOUSE_CD4_TCELL_UP
GSE3982_BCELL_VS_CENT_MEMORY_CD4_TCELL_UP	198	189	0.55	1.87	0	0.021098	https://www.gsea-msigdb.org/gsea/msigdb/human/geneset/GSE3982_BCELL_VS_CENT_MEMORY_CD4_TCELL_UP
GSE25123_CTRL_VS_ROSIGLITAZONE_STIM_PPARG_KO_MACROPHAGE_UP	197	188	0.54	1.87	0	0.020935	https://www.gsea-msigdb.org/gsea/msigdb/human/geneset/GSE25123_CTRL_VS_ROSIGLITAZONE_STIM_PPARG_KO_MACROPHAGE_UP
GSE6269_HEALTHY_VS_FLU_INF_PBMC_DN	162	151	0.59	1.87	0.003937	0.020854	https://www.gsea-msigdb.org/gsea/msigdb/human/geneset/GSE6269_HEALTHY_VS_FLU_INF_PBMC_DN
GSE41176_UNSTIM_VS_ANTI_IGM_STIM_BCELL_3H_UP	199	190	0.53	1.87	0.0019724	0.020838	https://www.gsea-msigdb.org/gsea/msigdb/human/geneset/GSE41176_UNSTIM_VS_ANTI_IGM_STIM_BCELL_3H_UP
GSE42021_CD24HI_VS_CD24INT_TREG_THYMUS_DN	200	189	0.65	1.87	0.005848	0.020732	https://www.gsea-msigdb.org/gsea/msigdb/human/geneset/GSE42021_CD24HI_VS_CD24INT_TREG_THYMUS_DN
GSE36888_UNTREATED_VS_IL2_TREATED_STAT5_AB_KNOCKIN_TCELL_2H_UP	200	193	0.58	1.86	0	0.020946	https://www.gsea-msigdb.org/gsea/msigdb/human/geneset/GSE36888_UNTREATED_VS_IL2_TREATED_STAT5_AB_KNOCKIN_TCELL_2H_UP
GSE34156_UNTREATED_VS_24H_NOD2_AND_TLR1_TLR2_LIGAND_TREATED_MONOCYTE_UP	194	179	0.46	1.86	0	0.020892	https://www.gsea-msigdb.org/gsea/msigdb/human/geneset/GSE34156_UNTREATED_VS_24H_NOD2_AND_TLR1_TLR2_LIGAND_TREATED_MONOCYTE_UP
GSE19198_1H_VS_6H_IL21_TREATED_TCELL_DN	200	189	0.56	1.86	0	0.020851	https://www.gsea-msigdb.org/gsea/msigdb/human/geneset/GSE19198_1H_VS_6H_IL21_TREATED_TCELL_DN
GSE360_L_DONOVANI_VS_B_MALAYI_HIGH_DOSE_MAC_UP	199	189	0.46	1.86	0	0.021023	https://www.gsea-msigdb.org/gsea/msigdb/human/geneset/GSE360_L_DONOVANI_VS_B_MALAYI_HIGH_DOSE_MAC_UP
GSE21063_WT_VS_NFATC1_KO_BCELL_UP	200	183	0.44	1.86	0	0.020932	https://www.gsea-msigdb.org/gsea/msigdb/human/geneset/GSE21063_WT_VS_NFATC1_KO_BCELL_UP
GSE43955_1H_VS_20H_ACT_CD4_TCELL_WITH_TGFB_IL6_DN	200	198	0.47	1.86	0.001912	0.020818	https://www.gsea-msigdb.org/gsea/msigdb/human/geneset/GSE43955_1H_VS_20H_ACT_CD4_TCELL_WITH_TGFB_IL6_DN
GSE14000_UNSTIM_VS_4H_LPS_DC_DN	199	183	0.63	1.86	0.0020202	0.02112	https://www.gsea-msigdb.org/gsea/msigdb/human/geneset/GSE14000_UNSTIM_VS_4H_LPS_DC_DN
GSE5679_CTRL_VS_PPARG_LIGAND_ROSIGLITAZONE_AND_RARA_AGONIST_AM580_TREATED_DC_UP	200	189	0.5	1.86	0	0.021031	https://www.gsea-msigdb.org/gsea/msigdb/human/geneset/GSE5679_CTRL_VS_PPARG_LIGAND_ROSIGLITAZONE_AND_RARA_AGONIST_AM580_TREATED_DC_UP
GSE2405_0H_VS_1.5H_A_PHAGOCYTOPHILUM_STIM_NEUTROPHIL_UP	200	191	0.44	1.86	0	0.021266	https://www.gsea-msigdb.org/gsea/msigdb/human/geneset/GSE2405_0H_VS_1.5H_A_PHAGOCYTOPHILUM_STIM_NEUTROPHIL_UP
GSE5589_LPS_AND_IL10_VS_LPS_AND_IL6_STIM_IL6_KO_MACROPHAGE_45MIN_UP	200	187	0.58	1.86	0	0.021499	https://www.gsea-msigdb.org/gsea/msigdb/human/geneset/GSE5589_LPS_AND_IL10_VS_LPS_AND_IL6_STIM_IL6_KO_MACROPHAGE_45MIN_UP
GSE24026_PD1_LIGATION_VS_CTRL_IN_ACT_TCELL_LINE_UP	198	186	0.54	1.86	0.0018832	0.02135	https://www.gsea-msigdb.org/gsea/msigdb/human/geneset/GSE24026_PD1_LIGATION_VS_CTRL_IN_ACT_TCELL_LINE_UP
GSE34205_HEALTHY_VS_FLU_INF_INFANT_PBMC_DN	200	182	0.55	1.86	0.0019763	0.021238	https://www.gsea-msigdb.org/gsea/msigdb/human/geneset/GSE34205_HEALTHY_VS_FLU_INF_INFANT_PBMC_DN
GSE13485_DAY3_VS_DAY7_YF17D_VACCINE_PBMC_DN	198	183	0.59	1.86	0.0020243	0.021361	https://www.gsea-msigdb.org/gsea/msigdb/human/geneset/GSE13485_DAY3_VS_DAY7_YF17D_VACCINE_PBMC_DN
GSE42724_MEMORY_VS_B1_BCELL_DN	197	179	0.54	1.86	0	0.02154	https://www.gsea-msigdb.org/gsea/msigdb/human/geneset/GSE42724_MEMORY_VS_B1_BCELL_DN
GSE11864_CSF1_VS_CSF1_PAM3CYS_IN_MAC_DN	193	180	0.48	1.86	0	0.021475	https://www.gsea-msigdb.org/gsea/msigdb/human/geneset/GSE11864_CSF1_VS_CSF1_PAM3CYS_IN_MAC_DN
GSE9960_HEALTHY_VS_GRAM_NEG_SEPSIS_PBMC_DN	199	190	0.58	1.86	0	0.021445	https://www.gsea-msigdb.org/gsea/msigdb/human/geneset/GSE9960_HEALTHY_VS_GRAM_NEG_SEPSIS_PBMC_DN
GSE2706_R848_VS_R848_AND_LPS_8H_STIM_DC_UP	189	174	0.41	1.86	0	0.021359	https://www.gsea-msigdb.org/gsea/msigdb/human/geneset/GSE2706_R848_VS_R848_AND_LPS_8H_STIM_DC_UP
GSE5542_UNTREATED_VS_IFNG_TREATED_EPITHELIAL_CELLS_24H_UP	198	188	0.45	1.85	0	0.021477	https://www.gsea-msigdb.org/gsea/msigdb/human/geneset/GSE5542_UNTREATED_VS_IFNG_TREATED_EPITHELIAL_CELLS_24H_UP
GSE5679_PPARG_LIGAND_ROSIGLITAZONE_VS_ROSIGLITAZONE_AND_RARA_AGONIST_AM580_TREATED_DC_UP	200	187	0.49	1.85	0	0.021504	https://www.gsea-msigdb.org/gsea/msigdb/human/geneset/GSE5679_PPARG_LIGAND_ROSIGLITAZONE_VS_ROSIGLITAZONE_AND_RARA_AGONIST_AM580_TREATED_DC_UP
GSE21774_CD62L_POS_CD56_DIM_VS_CD62L_NEG_CD56_DIM_NK_CELL_DN	199	190	0.5	1.85	0	0.021453	https://www.gsea-msigdb.org/gsea/msigdb/human/geneset/GSE21774_CD62L_POS_CD56_DIM_VS_CD62L_NEG_CD56_DIM_NK_CELL_DN
GSE36888_UNTREATED_VS_IL2_TREATED_TCELL_17H_DN	200	191	0.58	1.85	0.0020576	0.021468	https://www.gsea-msigdb.org/gsea/msigdb/human/geneset/GSE36888_UNTREATED_VS_IL2_TREATED_TCELL_17H_DN
GSE10325_CD4_TCELL_VS_MYELOID_DN	200	191	0.53	1.85	0.0038986	0.021682	https://www.gsea-msigdb.org/gsea/msigdb/human/geneset/GSE10325_CD4_TCELL_VS_MYELOID_DN
GSE22886_NAIVE_CD8_TCELL_VS_NEUTROPHIL_DN	197	189	0.48	1.85	0.001912	0.021565	https://www.gsea-msigdb.org/gsea/msigdb/human/geneset/GSE22886_NAIVE_CD8_TCELL_VS_NEUTROPHIL_DN
GSE34156_TLR1_TLR2_LIGAND_VS_NOD2_AND_TLR1_TLR2_LIGAND_24H_TREATED_MONOCYTE_UP	197	189	0.49	1.85	0.0037453	0.021547	https://www.gsea-msigdb.org/gsea/msigdb/human/geneset/GSE34156_TLR1_TLR2_LIGAND_VS_NOD2_AND_TLR1_TLR2_LIGAND_24H_TREATED_MONOCYTE_UP
GSE21546_UNSTIM_VS_ANTI_CD3_STIM_ELK1_KO_DP_THYMOCYTES_UP	190	175	0.49	1.85	0.0057361	0.021475	https://www.gsea-msigdb.org/gsea/msigdb/human/geneset/GSE21546_UNSTIM_VS_ANTI_CD3_STIM_ELK1_KO_DP_THYMOCYTES_UP
GSE1432_CTRL_VS_IFNG_6H_MICROGLIA_DN	200	188	0.61	1.85	0.004008	0.021758	https://www.gsea-msigdb.org/gsea/msigdb/human/geneset/GSE1432_CTRL_VS_IFNG_6H_MICROGLIA_DN
GSE29614_CTRL_VS_DAY7_TIV_FLU_VACCINE_PBMC_DN	194	174	0.68	1.85	0.002008	0.021814	https://www.gsea-msigdb.org/gsea/msigdb/human/geneset/GSE29614_CTRL_VS_DAY7_TIV_FLU_VACCINE_PBMC_DN
GSE12845_IGD_POS_VS_NEG_BLOOD_BCELL_DN	196	187	0.61	1.85	0.0059055	0.022165	https://www.gsea-msigdb.org/gsea/msigdb/human/geneset/GSE12845_IGD_POS_VS_NEG_BLOOD_BCELL_DN
GSE22935_WT_VS_MYD88_KO_MACROPHAGE_12H_MBOVIS_BCG_STIM_DN	200	192	0.47	1.85	0	0.022123	https://www.gsea-msigdb.org/gsea/msigdb/human/geneset/GSE22935_WT_VS_MYD88_KO_MACROPHAGE_12H_MBOVIS_BCG_STIM_DN
GSE22886_NAIVE_BCELL_VS_MONOCYTE_DN	200	193	0.57	1.85	0.0057471	0.022165	https://www.gsea-msigdb.org/gsea/msigdb/human/geneset/GSE22886_NAIVE_BCELL_VS_MONOCYTE_DN
GSE5542_IFNA_VS_IFNA_AND_IFNG_TREATED_EPITHELIAL_CELLS_24H_UP	200	194	0.45	1.85	0	0.02229	https://www.gsea-msigdb.org/gsea/msigdb/human/geneset/GSE5542_IFNA_VS_IFNA_AND_IFNG_TREATED_EPITHELIAL_CELLS_24H_UP
GSE13484_12H_UNSTIM_VS_YF17D_VACCINE_STIM_PBMC_DN	198	190	0.52	1.85	0	0.022268	https://www.gsea-msigdb.org/gsea/msigdb/human/geneset/GSE13484_12H_UNSTIM_VS_YF17D_VACCINE_STIM_PBMC_DN
GSE26912_TUMORICIDAL_VS_CTRL_MACROPHAGE_DN	200	191	0.48	1.84	0	0.022144	https://www.gsea-msigdb.org/gsea/msigdb/human/geneset/GSE26912_TUMORICIDAL_VS_CTRL_MACROPHAGE_DN
GSE25085_FETAL_BM_VS_ADULT_BM_SP4_THYMIC_IMPLANT_DN	199	188	0.49	1.84	0	0.022206	https://www.gsea-msigdb.org/gsea/msigdb/human/geneset/GSE25085_FETAL_BM_VS_ADULT_BM_SP4_THYMIC_IMPLANT_DN
GSE2706_UNSTIM_VS_2H_LPS_AND_R848_DC_DN	192	178	0.58	1.84	0.0019724	0.022733	https://www.gsea-msigdb.org/gsea/msigdb/human/geneset/GSE2706_UNSTIM_VS_2H_LPS_AND_R848_DC_DN
GSE43955_1H_VS_42H_ACT_CD4_TCELL_WITH_TGFB_IL6_DN	200	194	0.44	1.84	0	0.022639	https://www.gsea-msigdb.org/gsea/msigdb/human/geneset/GSE43955_1H_VS_42H_ACT_CD4_TCELL_WITH_TGFB_IL6_DN
GSE2706_UNSTIM_VS_8H_LPS_AND_R848_DC_DN	197	184	0.49	1.84	0.0020161	0.022566	https://www.gsea-msigdb.org/gsea/msigdb/human/geneset/GSE2706_UNSTIM_VS_8H_LPS_AND_R848_DC_DN
GSE21360_PRIMARY_VS_TERTIARY_MEMORY_CD8_TCELL_DN	200	194	0.59	1.84	0	0.022444	https://www.gsea-msigdb.org/gsea/msigdb/human/geneset/GSE21360_PRIMARY_VS_TERTIARY_MEMORY_CD8_TCELL_DN
GSE41867_DAY6_VS_DAY15_LCMV_ARMSTRONG_EFFECTOR_CD8_TCELL_UP	196	179	0.46	1.84	0.0018248	0.022491	https://www.gsea-msigdb.org/gsea/msigdb/human/geneset/GSE41867_DAY6_VS_DAY15_LCMV_ARMSTRONG_EFFECTOR_CD8_TCELL_UP
GSE32986_UNSTIM_VS_GMCSF_STIM_DC_DN	199	183	0.5	1.84	0	0.022421	https://www.gsea-msigdb.org/gsea/msigdb/human/geneset/GSE32986_UNSTIM_VS_GMCSF_STIM_DC_DN
GSE46606_DAY1_VS_DAY3_CD40L_IL2_IL5_STIMULATED_BCELL_DN	199	189	0.52	1.84	0	0.022419	https://www.gsea-msigdb.org/gsea/msigdb/human/geneset/GSE46606_DAY1_VS_DAY3_CD40L_IL2_IL5_STIMULATED_BCELL_DN
GSE43863_TFH_VS_LY6C_INT_CXCR5POS_EFFECTOR_CD4_TCELL_DN	199	185	0.42	1.84	0	0.02231	https://www.gsea-msigdb.org/gsea/msigdb/human/geneset/GSE43863_TFH_VS_LY6C_INT_CXCR5POS_EFFECTOR_CD4_TCELL_DN
GSE42021_TREG_VS_TCONV_PLN_UP	200	194	0.62	1.84	0.0077369	0.022184	https://www.gsea-msigdb.org/gsea/msigdb/human/geneset/GSE42021_TREG_VS_TCONV_PLN_UP
GSE17721_CTRL_VS_LPS_12H_BMDC_DN	199	186	0.47	1.84	0	0.022058	https://www.gsea-msigdb.org/gsea/msigdb/human/geneset/GSE17721_CTRL_VS_LPS_12H_BMDC_DN
GSE5542_UNTREATED_VS_IFNA_TREATED_EPITHELIAL_CELLS_6H_UP	199	181	0.45	1.84	0	0.021953	https://www.gsea-msigdb.org/gsea/msigdb/human/geneset/GSE5542_UNTREATED_VS_IFNA_TREATED_EPITHELIAL_CELLS_6H_UP
GSE15930_STIM_VS_STIM_AND_IFNAB_48H_CD8_T_CELL_DN	200	193	0.54	1.84	0.0019841	0.021955	https://www.gsea-msigdb.org/gsea/msigdb/human/geneset/GSE15930_STIM_VS_STIM_AND_IFNAB_48H_CD8_T_CELL_DN
GSE3982_NEUTROPHIL_VS_TH2_UP	200	192	0.41	1.84	0	0.022041	https://www.gsea-msigdb.org/gsea/msigdb/human/geneset/GSE3982_NEUTROPHIL_VS_TH2_UP
GSE22140_HEALTHY_VS_ARTHRITIC_GERMFREE_MOUSE_CD4_TCELL_DN	200	194	0.55	1.84	0.0019417	0.021938	https://www.gsea-msigdb.org/gsea/msigdb/human/geneset/GSE22140_HEALTHY_VS_ARTHRITIC_GERMFREE_MOUSE_CD4_TCELL_DN
GSE42021_CD24INT_VS_CD24LOW_TREG_THYMUS_DN	196	184	0.48	1.84	0.0019305	0.02237	https://www.gsea-msigdb.org/gsea/msigdb/human/geneset/GSE42021_CD24INT_VS_CD24LOW_TREG_THYMUS_DN
GSE41176_UNSTIM_VS_ANTI_IGM_STIM_TAK1_KO_BCELL_24H_DN	199	194	0.46	1.84	0.001992	0.022248	https://www.gsea-msigdb.org/gsea/msigdb/human/geneset/GSE41176_UNSTIM_VS_ANTI_IGM_STIM_TAK1_KO_BCELL_24H_DN
GSE40274_CTRL_VS_FOXP3_AND_GATA1_TRANSDUCED_ACTIVATED_CD4_TCELL_UP	141	126	0.49	1.84	0	0.022571	https://www.gsea-msigdb.org/gsea/msigdb/human/geneset/GSE40274_CTRL_VS_FOXP3_AND_GATA1_TRANSDUCED_ACTIVATED_CD4_TCELL_UP
GSE35685_CD34POS_CD10NEG_CD62LPOS_VS_CD34POS_CD10POS_BONE_MARROW_DN	200	195	0.54	1.84	0	0.022505	https://www.gsea-msigdb.org/gsea/msigdb/human/geneset/GSE35685_CD34POS_CD10NEG_CD62LPOS_VS_CD34POS_CD10POS_BONE_MARROW_DN
GSE2770_UNTREATED_VS_TGFB_AND_IL4_TREATED_ACT_CD4_TCELL_48H_UP	154	141	0.39	1.84	0	0.022411	https://www.gsea-msigdb.org/gsea/msigdb/human/geneset/GSE2770_UNTREATED_VS_TGFB_AND_IL4_TREATED_ACT_CD4_TCELL_48H_UP
GSE13485_CTRL_VS_DAY7_YF17D_VACCINE_PBMC_DN	200	194	0.63	1.84	0.0039448	0.022364	https://www.gsea-msigdb.org/gsea/msigdb/human/geneset/GSE13485_CTRL_VS_DAY7_YF17D_VACCINE_PBMC_DN
GSE360_L_MAJOR_VS_B_MALAYI_HIGH_DOSE_MAC_UP	200	193	0.42	1.84	0	0.022417	https://www.gsea-msigdb.org/gsea/msigdb/human/geneset/GSE360_L_MAJOR_VS_B_MALAYI_HIGH_DOSE_MAC_UP
GSE9006_HEALTHY_VS_TYPE_1_DIABETES_PBMC_AT_DX_DN	198	188	0.51	1.84	0.002008	0.022326	https://www.gsea-msigdb.org/gsea/msigdb/human/geneset/GSE9006_HEALTHY_VS_TYPE_1_DIABETES_PBMC_AT_DX_DN
GSE21360_SECONDARY_VS_QUATERNARY_MEMORY_CD8_TCELL_UP	182	174	0.53	1.84	0.003876	0.022235	https://www.gsea-msigdb.org/gsea/msigdb/human/geneset/GSE21360_SECONDARY_VS_QUATERNARY_MEMORY_CD8_TCELL_UP
GSE35825_UNTREATED_VS_IFNG_STIM_MACROPHAGE_UP	200	189	0.55	1.83	0	0.022752	https://www.gsea-msigdb.org/gsea/msigdb/human/geneset/GSE35825_UNTREATED_VS_IFNG_STIM_MACROPHAGE_UP
GSE360_T_GONDII_VS_M_TUBERCULOSIS_MAC_DN	198	183	0.42	1.83	0	0.022696	https://www.gsea-msigdb.org/gsea/msigdb/human/geneset/GSE360_T_GONDII_VS_M_TUBERCULOSIS_MAC_DN
GSE14699_DELETIONAL_TOLERANCE_VS_ACTIVATED_CD8_TCELL_UP	180	173	0.5	1.83	0.0019724	0.023099	https://www.gsea-msigdb.org/gsea/msigdb/human/geneset/GSE14699_DELETIONAL_TOLERANCE_VS_ACTIVATED_CD8_TCELL_UP
GSE24634_TEFF_VS_TCONV_DAY7_IN_CULTURE_DN	200	195	0.51	1.83	0.007722	0.023578	https://www.gsea-msigdb.org/gsea/msigdb/human/geneset/GSE24634_TEFF_VS_TCONV_DAY7_IN_CULTURE_DN
GSE40274_CTRL_VS_FOXP3_AND_LEF1_TRANSDUCED_ACTIVATED_CD4_TCELL_UP	165	158	0.5	1.83	0	0.023527	https://www.gsea-msigdb.org/gsea/msigdb/human/geneset/GSE40274_CTRL_VS_FOXP3_AND_LEF1_TRANSDUCED_ACTIVATED_CD4_TCELL_UP
GSE18791_UNSTIM_VS_NEWCATSLE_VIRUS_DC_6H_DN	195	180	0.58	1.83	0.0039604	0.023615	https://www.gsea-msigdb.org/gsea/msigdb/human/geneset/GSE18791_UNSTIM_VS_NEWCATSLE_VIRUS_DC_6H_DN
GSE42021_TREG_PLN_VS_CD24LO_TREG_THYMUS_DN	197	188	0.53	1.83	0.009901	0.023755	https://www.gsea-msigdb.org/gsea/msigdb/human/geneset/GSE42021_TREG_PLN_VS_CD24LO_TREG_THYMUS_DN
GSE15330_MEGAKARYOCYTE_ERYTHROID_VS_GRANULOCYTE_MONOCYTE_PROGENITOR_UP	178	169	0.49	1.83	0.0039448	0.023644	https://www.gsea-msigdb.org/gsea/msigdb/human/geneset/GSE15330_MEGAKARYOCYTE_ERYTHROID_VS_GRANULOCYTE_MONOCYTE_PROGENITOR_UP
GSE24142_DN2_VS_DN3_THYMOCYTE_FETAL_UP	200	189	0.46	1.83	0	0.023696	https://www.gsea-msigdb.org/gsea/msigdb/human/geneset/GSE24142_DN2_VS_DN3_THYMOCYTE_FETAL_UP
GSE13522_CTRL_VS_T_CRUZI_Y_STRAIN_INF_SKIN_IFNAR_KO_DN	200	188	0.43	1.83	0	0.023825	https://www.gsea-msigdb.org/gsea/msigdb/human/geneset/GSE13522_CTRL_VS_T_CRUZI_Y_STRAIN_INF_SKIN_IFNAR_KO_DN
GSE22935_WT_VS_MYD88_KO_MACROPHAGE_48H_MBOVIS_BCG_STIM_DN	200	189	0.51	1.83	0.001992	0.023867	https://www.gsea-msigdb.org/gsea/msigdb/human/geneset/GSE22935_WT_VS_MYD88_KO_MACROPHAGE_48H_MBOVIS_BCG_STIM_DN
GSE3039_NKT_CELL_VS_B2_BCELL_DN	200	183	0.48	1.83	0	0.023825	https://www.gsea-msigdb.org/gsea/msigdb/human/geneset/GSE3039_NKT_CELL_VS_B2_BCELL_DN
GSE29617_CTRL_VS_DAY7_TIV_FLU_VACCINE_PBMC_2008_DN	194	173	0.56	1.83	0.001992	0.023842	https://www.gsea-msigdb.org/gsea/msigdb/human/geneset/GSE29617_CTRL_VS_DAY7_TIV_FLU_VACCINE_PBMC_2008_DN
GSE22886_DAY1_VS_DAY7_MONOCYTE_IN_CULTURE_UP	198	191	0.56	1.83	0	0.024009	https://www.gsea-msigdb.org/gsea/msigdb/human/geneset/GSE22886_DAY1_VS_DAY7_MONOCYTE_IN_CULTURE_UP
GSE11864_CSF1_VS_CSF1_IFNG_PAM3CYS_IN_MAC_DN	198	184	0.46	1.83	0.0019763	0.023925	https://www.gsea-msigdb.org/gsea/msigdb/human/geneset/GSE11864_CSF1_VS_CSF1_IFNG_PAM3CYS_IN_MAC_DN
GSE21546_WT_VS_SAP1A_KO_ANTI_CD3_STIM_DP_THYMOCYTES_UP	200	188	0.47	1.83	0.001912	0.023925	https://www.gsea-msigdb.org/gsea/msigdb/human/geneset/GSE21546_WT_VS_SAP1A_KO_ANTI_CD3_STIM_DP_THYMOCYTES_UP
GSE32986_GMCSF_VS_GMCSF_AND_CURDLAN_LOWDOSE_STIM_DC_UP	200	182	0.52	1.82	0	0.024229	https://www.gsea-msigdb.org/gsea/msigdb/human/geneset/GSE32986_GMCSF_VS_GMCSF_AND_CURDLAN_LOWDOSE_STIM_DC_UP
GSE22886_DC_VS_MONOCYTE_DN	200	186	0.53	1.82	0.0039604	0.024211	https://www.gsea-msigdb.org/gsea/msigdb/human/geneset/GSE22886_DC_VS_MONOCYTE_DN
GSE21360_SECONDARY_VS_QUATERNARY_MEMORY_CD8_TCELL_DN	164	155	0.51	1.82	0.0079681	0.024095	https://www.gsea-msigdb.org/gsea/msigdb/human/geneset/GSE21360_SECONDARY_VS_QUATERNARY_MEMORY_CD8_TCELL_DN
GSE1740_MCSF_VS_MCSF_AND_IFNG_DAY2_DERIVED_MACROPHAGE_UP	195	178	0.45	1.82	0.0038023	0.024508	https://www.gsea-msigdb.org/gsea/msigdb/human/geneset/GSE1740_MCSF_VS_MCSF_AND_IFNG_DAY2_DERIVED_MACROPHAGE_UP
GSE11961_GERMINAL_CENTER_BCELL_DAY7_VS_PLASMA_CELL_DAY7_UP	200	189	0.48	1.82	0	0.024424	https://www.gsea-msigdb.org/gsea/msigdb/human/geneset/GSE11961_GERMINAL_CENTER_BCELL_DAY7_VS_PLASMA_CELL_DAY7_UP
GSE10325_LUPUS_CD4_TCELL_VS_LUPUS_BCELL_DN	196	183	0.56	1.82	0.011788	0.024325	https://www.gsea-msigdb.org/gsea/msigdb/human/geneset/GSE10325_LUPUS_CD4_TCELL_VS_LUPUS_BCELL_DN
GSE22601_IMMATURE_CD4_SINGLE_POSITIVE_VS_CD4_SINGLE_POSITIVE_THYMOCYTE_DN	200	181	0.41	1.82	0	0.024243	https://www.gsea-msigdb.org/gsea/msigdb/human/geneset/GSE22601_IMMATURE_CD4_SINGLE_POSITIVE_VS_CD4_SINGLE_POSITIVE_THYMOCYTE_DN
GSE13485_CTRL_VS_DAY3_YF17D_VACCINE_PBMC_DN	199	190	0.57	1.82	0.0078585	0.024185	https://www.gsea-msigdb.org/gsea/msigdb/human/geneset/GSE13485_CTRL_VS_DAY3_YF17D_VACCINE_PBMC_DN
GSE360_CTRL_VS_L_MAJOR_DC_DN	199	193	0.49	1.82	0	0.024477	https://www.gsea-msigdb.org/gsea/msigdb/human/geneset/GSE360_CTRL_VS_L_MAJOR_DC_DN
GSE1432_CTRL_VS_IFNG_24H_MICROGLIA_DN	200	190	0.63	1.82	0.0040161	0.024569	https://www.gsea-msigdb.org/gsea/msigdb/human/geneset/GSE1432_CTRL_VS_IFNG_24H_MICROGLIA_DN
GSE43955_10H_VS_30H_ACT_CD4_TCELL_UP	200	192	0.46	1.82	0	0.024573	https://www.gsea-msigdb.org/gsea/msigdb/human/geneset/GSE43955_10H_VS_30H_ACT_CD4_TCELL_UP
GSE12845_PRE_GC_VS_DARKZONE_GC_TONSIL_BCELL_UP	196	189	0.55	1.82	0.0038168	0.024601	https://www.gsea-msigdb.org/gsea/msigdb/human/geneset/GSE12845_PRE_GC_VS_DARKZONE_GC_TONSIL_BCELL_UP
GSE29617_DAY3_VS_DAY7_TIV_FLU_VACCINE_PBMC_2008_DN	191	170	0.52	1.82	0.0039604	0.02501	https://www.gsea-msigdb.org/gsea/msigdb/human/geneset/GSE29617_DAY3_VS_DAY7_TIV_FLU_VACCINE_PBMC_2008_DN
GSE2706_R848_VS_LPS_8H_STIM_DC_DN	190	180	0.44	1.82	0	0.025028	https://www.gsea-msigdb.org/gsea/msigdb/human/geneset/GSE2706_R848_VS_LPS_8H_STIM_DC_DN
GSE13484_3H_UNSTIM_VS_YF17D_VACCINE_STIM_PBMC_DN	198	191	0.52	1.82	0.0039841	0.025177	https://www.gsea-msigdb.org/gsea/msigdb/human/geneset/GSE13484_3H_UNSTIM_VS_YF17D_VACCINE_STIM_PBMC_DN
GSE5455_HEALTHY_VS_TUMOR_BEARING_MOUSE_SPLEEN_MONOCYTE_24H_INCUBATION_DN	198	182	0.46	1.82	0.0019342	0.025202	https://www.gsea-msigdb.org/gsea/msigdb/human/geneset/GSE5455_HEALTHY_VS_TUMOR_BEARING_MOUSE_SPLEEN_MONOCYTE_24H_INCUBATION_DN
GSE3982_MAC_VS_NEUTROPHIL_DN	195	188	0.45	1.82	0	0.025143	https://www.gsea-msigdb.org/gsea/msigdb/human/geneset/GSE3982_MAC_VS_NEUTROPHIL_DN
GSE17301_CTRL_VS_48H_ACD3_ACD28_STIM_CD8_TCELL_DN	200	186	0.5	1.82	0.003876	0.025198	https://www.gsea-msigdb.org/gsea/msigdb/human/geneset/GSE17301_CTRL_VS_48H_ACD3_ACD28_STIM_CD8_TCELL_DN
GSE21063_WT_VS_NFATC1_KO_3H_ANTI_IGM_STIM_BCELL_DN	200	190	0.45	1.82	0	0.025222	https://www.gsea-msigdb.org/gsea/msigdb/human/geneset/GSE21063_WT_VS_NFATC1_KO_3H_ANTI_IGM_STIM_BCELL_DN
GSE37533_PPARG1_FOXP3_VS_PPARG2_FOXP3_TRANSDUCED_CD4_TCELL_PIOGLITAZONE_TREATED_DN	199	193	0.63	1.82	0.0097656	0.025224	https://www.gsea-msigdb.org/gsea/msigdb/human/geneset/GSE37533_PPARG1_FOXP3_VS_PPARG2_FOXP3_TRANSDUCED_CD4_TCELL_PIOGLITAZONE_TREATED_DN
GSE6269_E_COLI_VS_STREP_PNEUMO_INF_PBMC_DN	169	162	0.51	1.81	0.0040404	0.025285	https://www.gsea-msigdb.org/gsea/msigdb/human/geneset/GSE6269_E_COLI_VS_STREP_PNEUMO_INF_PBMC_DN
GSE21360_NAIVE_VS_PRIMARY_MEMORY_CD8_TCELL_UP	173	163	0.48	1.81	0.0037736	0.025443	https://www.gsea-msigdb.org/gsea/msigdb/human/geneset/GSE21360_NAIVE_VS_PRIMARY_MEMORY_CD8_TCELL_UP
GSE35825_IFNA_VS_IFNG_STIM_MACROPHAGE_UP	163	158	0.52	1.81	0.002004	0.025474	https://www.gsea-msigdb.org/gsea/msigdb/human/geneset/GSE35825_IFNA_VS_IFNG_STIM_MACROPHAGE_UP
GSE41867_DAY6_EFFECTOR_VS_DAY30_EXHAUSTED_CD8_TCELL_LCMV_CLONE13_UP	200	186	0.5	1.81	0	0.025526	https://www.gsea-msigdb.org/gsea/msigdb/human/geneset/GSE41867_DAY6_EFFECTOR_VS_DAY30_EXHAUSTED_CD8_TCELL_LCMV_CLONE13_UP
GSE3400_UNTREATED_VS_IFNB_TREATED_MEF_DN	194	176	0.43	1.81	0.0017668	0.02546	https://www.gsea-msigdb.org/gsea/msigdb/human/geneset/GSE3400_UNTREATED_VS_IFNB_TREATED_MEF_DN
GSE7509_DC_VS_MONOCYTE_WITH_FCGRIIB_STIM_DN	197	192	0.57	1.81	0.0019763	0.025394	https://www.gsea-msigdb.org/gsea/msigdb/human/geneset/GSE7509_DC_VS_MONOCYTE_WITH_FCGRIIB_STIM_DN
GSE29618_MONOCYTE_VS_MDC_UP	200	192	0.54	1.81	0.0078585	0.025329	https://www.gsea-msigdb.org/gsea/msigdb/human/geneset/GSE29618_MONOCYTE_VS_MDC_UP
GSE37301_HEMATOPOIETIC_STEM_CELL_VS_CD4_TCELL_UP	176	166	0.55	1.81	0.001996	0.025352	https://www.gsea-msigdb.org/gsea/msigdb/human/geneset/GSE37301_HEMATOPOIETIC_STEM_CELL_VS_CD4_TCELL_UP
GSE22196_HEALTHY_VS_OBESE_MOUSE_SKIN_GAMMADELTA_TCELL_DN	200	196	0.51	1.81	0	0.026129	https://www.gsea-msigdb.org/gsea/msigdb/human/geneset/GSE22196_HEALTHY_VS_OBESE_MOUSE_SKIN_GAMMADELTA_TCELL_DN
GSE11057_NAIVE_VS_CENT_MEMORY_CD4_TCELL_DN	199	192	0.49	1.81	0	0.026047	https://www.gsea-msigdb.org/gsea/msigdb/human/geneset/GSE11057_NAIVE_VS_CENT_MEMORY_CD4_TCELL_DN
GSE18791_UNSTIM_VS_NEWCATSLE_VIRUS_DC_10H_DN	197	181	0.57	1.81	0.0060729	0.02644	https://www.gsea-msigdb.org/gsea/msigdb/human/geneset/GSE18791_UNSTIM_VS_NEWCATSLE_VIRUS_DC_10H_DN
GSE21360_PRIMARY_VS_QUATERNARY_MEMORY_CD8_TCELL_UP	175	169	0.48	1.81	0	0.026415	https://www.gsea-msigdb.org/gsea/msigdb/human/geneset/GSE21360_PRIMARY_VS_QUATERNARY_MEMORY_CD8_TCELL_UP
GSE9960_GRAM_POS_VS_GRAM_NEG_AND_POS_SEPSIS_PBMC_DN	200	189	0.4	1.81	0	0.026411	https://www.gsea-msigdb.org/gsea/msigdb/human/geneset/GSE9960_GRAM_POS_VS_GRAM_NEG_AND_POS_SEPSIS_PBMC_DN
GSE8835_HEALTHY_VS_CLL_CD4_TCELL_UP	199	183	0.43	1.81	0	0.02655	https://www.gsea-msigdb.org/gsea/msigdb/human/geneset/GSE8835_HEALTHY_VS_CLL_CD4_TCELL_UP
GSE3982_CENT_MEMORY_CD4_TCELL_VS_NKCELL_DN	199	186	0.43	1.81	0	0.026532	https://www.gsea-msigdb.org/gsea/msigdb/human/geneset/GSE3982_CENT_MEMORY_CD4_TCELL_VS_NKCELL_DN
GSE18791_CTRL_VS_NEWCASTLE_VIRUS_DC_4H_DN	189	174	0.52	1.81	0.0039683	0.026767	https://www.gsea-msigdb.org/gsea/msigdb/human/geneset/GSE18791_CTRL_VS_NEWCASTLE_VIRUS_DC_4H_DN
GSE6269_E_COLI_VS_STAPH_AUREUS_INF_PBMC_DN	175	165	0.53	1.81	0.0059055	0.026713	https://www.gsea-msigdb.org/gsea/msigdb/human/geneset/GSE6269_E_COLI_VS_STAPH_AUREUS_INF_PBMC_DN
GSE46606_UNSTIM_VS_CD40L_IL2_IL5_1DAY_STIMULATED_IRF4_KO_BCELL_UP	200	192	0.56	1.81	0	0.02682	https://www.gsea-msigdb.org/gsea/msigdb/human/geneset/GSE46606_UNSTIM_VS_CD40L_IL2_IL5_1DAY_STIMULATED_IRF4_KO_BCELL_UP
GSE42724_NAIVE_BCELL_VS_PLASMABLAST_UP	197	182	0.6	1.81	0.01004	0.026836	https://www.gsea-msigdb.org/gsea/msigdb/human/geneset/GSE42724_NAIVE_BCELL_VS_PLASMABLAST_UP
GSE40685_TREG_VS_FOXP3_KO_TREG_PRECURSOR_DN	199	191	0.52	1.8	0.0039526	0.0269	https://www.gsea-msigdb.org/gsea/msigdb/human/geneset/GSE40685_TREG_VS_FOXP3_KO_TREG_PRECURSOR_DN
GSE16755_CTRL_VS_IFNA_TREATED_MAC_DN	199	184	0.54	1.8	0.0019268	0.026964	https://www.gsea-msigdb.org/gsea/msigdb/human/geneset/GSE16755_CTRL_VS_IFNA_TREATED_MAC_DN
GSE17721_CTRL_VS_LPS_6H_BMDC_DN	199	187	0.44	1.8	0	0.026924	https://www.gsea-msigdb.org/gsea/msigdb/human/geneset/GSE17721_CTRL_VS_LPS_6H_BMDC_DN
GSE36826_NORMAL_VS_STAPH_AUREUS_INF_SKIN_UP	198	189	0.54	1.8	0	0.026898	https://www.gsea-msigdb.org/gsea/msigdb/human/geneset/GSE36826_NORMAL_VS_STAPH_AUREUS_INF_SKIN_UP
GSE10325_BCELL_VS_MYELOID_DN	200	194	0.53	1.8	0.0077071	0.02696	https://www.gsea-msigdb.org/gsea/msigdb/human/geneset/GSE10325_BCELL_VS_MYELOID_DN
GSE34156_NOD2_LIGAND_VS_TLR1_TLR2_LIGAND_6H_TREATED_MONOCYTE_UP	200	192	0.51	1.8	0.0060729	0.026982	https://www.gsea-msigdb.org/gsea/msigdb/human/geneset/GSE34156_NOD2_LIGAND_VS_TLR1_TLR2_LIGAND_6H_TREATED_MONOCYTE_UP
GSE6259_CD4_TCELL_VS_CD8_TCELL_UP	187	173	0.5	1.8	0.0058594	0.027159	https://www.gsea-msigdb.org/gsea/msigdb/human/geneset/GSE6259_CD4_TCELL_VS_CD8_TCELL_UP
GSE360_L_DONOVANI_VS_B_MALAYI_HIGH_DOSE_DC_UP	199	190	0.49	1.8	0.0018975	0.027314	https://www.gsea-msigdb.org/gsea/msigdb/human/geneset/GSE360_L_DONOVANI_VS_B_MALAYI_HIGH_DOSE_DC_UP
GSE26495_NAIVE_VS_PD1HIGH_CD8_TCELL_DN	200	189	0.47	1.8	0	0.027307	https://www.gsea-msigdb.org/gsea/msigdb/human/geneset/GSE26495_NAIVE_VS_PD1HIGH_CD8_TCELL_DN
GSE28130_ACTIVATED_VS_INDUCEED_TREG_UP	197	188	0.41	1.8	0	0.027207	https://www.gsea-msigdb.org/gsea/msigdb/human/geneset/GSE28130_ACTIVATED_VS_INDUCEED_TREG_UP
GSE41978_ID2_KO_VS_BIM_KO_KLRG1_LOW_EFFECTOR_CD8_TCELL_UP	199	191	0.6	1.8	0.013834	0.027553	https://www.gsea-msigdb.org/gsea/msigdb/human/geneset/GSE41978_ID2_KO_VS_BIM_KO_KLRG1_LOW_EFFECTOR_CD8_TCELL_UP
GSE30971_WBP7_HET_VS_KO_MACROPHAGE_4H_LPS_STIM_UP	199	185	0.57	1.8	0.0020325	0.027705	https://www.gsea-msigdb.org/gsea/msigdb/human/geneset/GSE30971_WBP7_HET_VS_KO_MACROPHAGE_4H_LPS_STIM_UP
GSE41176_WT_VS_TAK1_KO_ANTI_IGM_STIM_BCELL_3H_DN	200	195	0.58	1.8	0.0038835	0.027895	https://www.gsea-msigdb.org/gsea/msigdb/human/geneset/GSE41176_WT_VS_TAK1_KO_ANTI_IGM_STIM_BCELL_3H_DN
GSE6269_HEALTHY_VS_STAPH_PNEUMO_INF_PBMC_DN	170	159	0.51	1.8	0.0020367	0.027984	https://www.gsea-msigdb.org/gsea/msigdb/human/geneset/GSE6269_HEALTHY_VS_STAPH_PNEUMO_INF_PBMC_DN
GSE17721_POLYIC_VS_PAM3CSK4_1H_BMDC_DN	200	187	0.42	1.8	0	0.028067	https://www.gsea-msigdb.org/gsea/msigdb/human/geneset/GSE17721_POLYIC_VS_PAM3CSK4_1H_BMDC_DN
GSE2706_R848_VS_R848_AND_LPS_2H_STIM_DC_DN	191	180	0.47	1.8	0.0019685	0.028599	https://www.gsea-msigdb.org/gsea/msigdb/human/geneset/GSE2706_R848_VS_R848_AND_LPS_2H_STIM_DC_DN
GSE17721_CTRL_VS_GARDIQUIMOD_12H_BMDC_DN	198	187	0.46	1.79	0.0019763	0.029219	https://www.gsea-msigdb.org/gsea/msigdb/human/geneset/GSE17721_CTRL_VS_GARDIQUIMOD_12H_BMDC_DN
GSE1460_DP_VS_CD4_THYMOCYTE_DN	200	193	0.47	1.79	0	0.029295	https://www.gsea-msigdb.org/gsea/msigdb/human/geneset/GSE1460_DP_VS_CD4_THYMOCYTE_DN
GSE8515_CTRL_VS_IL1_4H_STIM_MAC_DN	197	189	0.48	1.79	0.0018904	0.029378	https://www.gsea-msigdb.org/gsea/msigdb/human/geneset/GSE8515_CTRL_VS_IL1_4H_STIM_MAC_DN
GSE17974_IL4_AND_ANTI_IL12_VS_UNTREATED_48H_ACT_CD4_TCELL_DN	196	182	0.42	1.79	0	0.029531	https://www.gsea-msigdb.org/gsea/msigdb/human/geneset/GSE17974_IL4_AND_ANTI_IL12_VS_UNTREATED_48H_ACT_CD4_TCELL_DN
GSE3982_DC_VS_NEUTROPHIL_DN	197	188	0.43	1.79	0	0.029548	https://www.gsea-msigdb.org/gsea/msigdb/human/geneset/GSE3982_DC_VS_NEUTROPHIL_DN
GSE45365_HEALTHY_VS_MCMV_INFECTION_CD8A_DC_DN	200	192	0.52	1.79	0	0.029533	https://www.gsea-msigdb.org/gsea/msigdb/human/geneset/GSE45365_HEALTHY_VS_MCMV_INFECTION_CD8A_DC_DN
GSE8515_IL1_VS_IL6_4H_STIM_MAC_UP	200	193	0.52	1.79	0.004008	0.029474	https://www.gsea-msigdb.org/gsea/msigdb/human/geneset/GSE8515_IL1_VS_IL6_4H_STIM_MAC_UP
GSE22886_NAIVE_TCELL_VS_MONOCYTE_DN	200	191	0.54	1.79	0.013861	0.02951	https://www.gsea-msigdb.org/gsea/msigdb/human/geneset/GSE22886_NAIVE_TCELL_VS_MONOCYTE_DN
GSE32533_MIR17_KO_VS_MIR17_OVEREXPRESS_ACT_CD4_TCELL_UP	200	189	0.43	1.79	0.0019231	0.029571	https://www.gsea-msigdb.org/gsea/msigdb/human/geneset/GSE32533_MIR17_KO_VS_MIR17_OVEREXPRESS_ACT_CD4_TCELL_UP
GSE2706_UNSTIM_VS_2H_LPS_DC_DN	194	182	0.53	1.79	0.0057471	0.029606	https://www.gsea-msigdb.org/gsea/msigdb/human/geneset/GSE2706_UNSTIM_VS_2H_LPS_DC_DN
GSE2706_UNSTIM_VS_8H_LPS_DC_DN	198	186	0.47	1.79	0.0019455	0.029811	https://www.gsea-msigdb.org/gsea/msigdb/human/geneset/GSE2706_UNSTIM_VS_8H_LPS_DC_DN
GSE33424_CD161_INT_VS_NEG_CD8_TCELL_UP	200	185	0.55	1.79	0.0059289	0.029714	https://www.gsea-msigdb.org/gsea/msigdb/human/geneset/GSE33424_CD161_INT_VS_NEG_CD8_TCELL_UP
GSE2770_TGFB_AND_IL4_ACT_VS_ACT_CD4_TCELL_2H_DN	194	184	0.57	1.79	0.0077369	0.030153	https://www.gsea-msigdb.org/gsea/msigdb/human/geneset/GSE2770_TGFB_AND_IL4_ACT_VS_ACT_CD4_TCELL_2H_DN
GSE36527_CD69_NEG_VS_POS_TREG_CD62L_LOS_KLRG1_NEG_UP	200	189	0.55	1.79	0.0039761	0.030074	https://www.gsea-msigdb.org/gsea/msigdb/human/geneset/GSE36527_CD69_NEG_VS_POS_TREG_CD62L_LOS_KLRG1_NEG_UP
GSE3039_CD4_TCELL_VS_ALPHABETA_CD8_TCELL_UP	200	185	0.42	1.79	0.0037175	0.029965	https://www.gsea-msigdb.org/gsea/msigdb/human/geneset/GSE3039_CD4_TCELL_VS_ALPHABETA_CD8_TCELL_UP
GSE20727_CTRL_VS_ROS_INHIBITOR_TREATED_DC_DN	199	189	0.49	1.79	0.0079365	0.029937	https://www.gsea-msigdb.org/gsea/msigdb/human/geneset/GSE20727_CTRL_VS_ROS_INHIBITOR_TREATED_DC_DN
GSE46606_UNSTIM_VS_CD40L_IL2_IL5_3DAY_STIMULATED_IRF4MID_SORTED_BCELL_DN	200	187	0.47	1.79	0	0.029842	https://www.gsea-msigdb.org/gsea/msigdb/human/geneset/GSE46606_UNSTIM_VS_CD40L_IL2_IL5_3DAY_STIMULATED_IRF4MID_SORTED_BCELL_DN
GSE23502_WT_VS_HDC_KO_MYELOID_DERIVED_SUPPRESSOR_CELL_COLON_TUMOR_UP	200	187	0.52	1.79	0.014	0.029784	https://www.gsea-msigdb.org/gsea/msigdb/human/geneset/GSE23502_WT_VS_HDC_KO_MYELOID_DERIVED_SUPPRESSOR_CELL_COLON_TUMOR_UP
GSE24634_TREG_VS_TCONV_POST_DAY10_IL4_CONVERSION_DN	200	198	0.5	1.79	0.013308	0.029781	https://www.gsea-msigdb.org/gsea/msigdb/human/geneset/GSE24634_TREG_VS_TCONV_POST_DAY10_IL4_CONVERSION_DN
GSE3720_UNSTIM_VS_PMA_STIM_VD1_GAMMADELTA_TCELL_DN	135	115	0.41	1.79	0	0.029966	https://www.gsea-msigdb.org/gsea/msigdb/human/geneset/GSE3720_UNSTIM_VS_PMA_STIM_VD1_GAMMADELTA_TCELL_DN
GSE37532_VISCERAL_ADIPOSE_TISSUE_VS_LN_DERIVED_TCONV_CD4_TCELL_UP	128	112	0.42	1.79	0	0.029932	https://www.gsea-msigdb.org/gsea/msigdb/human/geneset/GSE37532_VISCERAL_ADIPOSE_TISSUE_VS_LN_DERIVED_TCONV_CD4_TCELL_UP
GSE42021_TREG_PLN_VS_TREG_PRECURSORS_THYMUS_DN	200	195	0.56	1.79	0.011719	0.029826	https://www.gsea-msigdb.org/gsea/msigdb/human/geneset/GSE42021_TREG_PLN_VS_TREG_PRECURSORS_THYMUS_DN
GSE21546_WT_VS_SAP1A_KO_DP_THYMOCYTES_UP	197	186	0.57	1.79	0.017928	0.029817	https://www.gsea-msigdb.org/gsea/msigdb/human/geneset/GSE21546_WT_VS_SAP1A_KO_DP_THYMOCYTES_UP
GSE360_DC_VS_MAC_DN	198	188	0.49	1.78	0.0037665	0.030101	https://www.gsea-msigdb.org/gsea/msigdb/human/geneset/GSE360_DC_VS_MAC_DN
GSE34392_ST2_KO_VS_WT_DAY8_LCMV_EFFECTOR_CD8_TCELL_DN	200	192	0.5	1.78	0.0039216	0.03027	https://www.gsea-msigdb.org/gsea/msigdb/human/geneset/GSE34392_ST2_KO_VS_WT_DAY8_LCMV_EFFECTOR_CD8_TCELL_DN
GSE18791_CTRL_VS_NEWCASTLE_VIRUS_DC_16H_DN	195	185	0.47	1.78	0.0019194	0.030545	https://www.gsea-msigdb.org/gsea/msigdb/human/geneset/GSE18791_CTRL_VS_NEWCASTLE_VIRUS_DC_16H_DN
GSE46606_IRF4_KO_VS_WT_CD40L_IL2_IL5_1DAY_STIMULATED_BCELL_DN	195	181	0.41	1.78	0	0.030545	https://www.gsea-msigdb.org/gsea/msigdb/human/geneset/GSE46606_IRF4_KO_VS_WT_CD40L_IL2_IL5_1DAY_STIMULATED_BCELL_DN
GSE29618_PDC_VS_MDC_UP	198	189	0.47	1.78	0	0.03044	https://www.gsea-msigdb.org/gsea/msigdb/human/geneset/GSE29618_PDC_VS_MDC_UP
GSE12366_PLASMA_CELL_VS_NAIVE_BCELL_UP	195	176	0.43	1.78	0.0018975	0.030916	https://www.gsea-msigdb.org/gsea/msigdb/human/geneset/GSE12366_PLASMA_CELL_VS_NAIVE_BCELL_UP
GSE22140_GERMFREE_VS_SPF_MOUSE_CD4_TCELL_DN	200	195	0.51	1.78	0.0019724	0.030886	https://www.gsea-msigdb.org/gsea/msigdb/human/geneset/GSE22140_GERMFREE_VS_SPF_MOUSE_CD4_TCELL_DN
GSE40274_CTRL_VS_GATA1_TRANSDUCED_ACTIVATED_CD4_TCELL_UP	148	134	0.5	1.78	0.0019048	0.030798	https://www.gsea-msigdb.org/gsea/msigdb/human/geneset/GSE40274_CTRL_VS_GATA1_TRANSDUCED_ACTIVATED_CD4_TCELL_UP
GSE24634_IL4_VS_CTRL_TREATED_NAIVE_CD4_TCELL_DAY10_DN	199	189	0.51	1.78	0.0079523	0.030862	https://www.gsea-msigdb.org/gsea/msigdb/human/geneset/GSE24634_IL4_VS_CTRL_TREATED_NAIVE_CD4_TCELL_DAY10_DN
GSE41087_WT_VS_FOXP3_MUT_ANTI_CD3_CD28_STIM_CD4_TCELL_UP	195	186	0.52	1.78	0.0039683	0.031203	https://www.gsea-msigdb.org/gsea/msigdb/human/geneset/GSE41087_WT_VS_FOXP3_MUT_ANTI_CD3_CD28_STIM_CD4_TCELL_UP
GSE3565_DUSP1_VS_WT_SPLENOCYTES_UP	163	156	0.45	1.78	0.0057252	0.031132	https://www.gsea-msigdb.org/gsea/msigdb/human/geneset/GSE3565_DUSP1_VS_WT_SPLENOCYTES_UP
GSE19772_CTRL_VS_HCMV_INF_MONOCYTES_AND_PI3K_INHIBITION_UP	194	184	0.44	1.78	0	0.031136	https://www.gsea-msigdb.org/gsea/msigdb/human/geneset/GSE19772_CTRL_VS_HCMV_INF_MONOCYTES_AND_PI3K_INHIBITION_UP
GSE1791_CTRL_VS_NEUROMEDINU_IN_T_CELL_LINE_12H_DN	193	172	0.46	1.78	0	0.031129	https://www.gsea-msigdb.org/gsea/msigdb/human/geneset/GSE1791_CTRL_VS_NEUROMEDINU_IN_T_CELL_LINE_12H_DN
GSE13522_WT_VS_IFNAR_KO_SKIN_DN	178	168	0.45	1.78	0.0058824	0.031247	https://www.gsea-msigdb.org/gsea/msigdb/human/geneset/GSE13522_WT_VS_IFNAR_KO_SKIN_DN
GSE7459_UNTREATED_VS_IL6_TREATED_ACT_CD4_TCELL_DN	145	120	0.38	1.78	0	0.031274	https://www.gsea-msigdb.org/gsea/msigdb/human/geneset/GSE7459_UNTREATED_VS_IL6_TREATED_ACT_CD4_TCELL_DN
GSE17721_0.5H_VS_4H_CPG_BMDC_DN	200	190	0.46	1.78	0	0.031357	https://www.gsea-msigdb.org/gsea/msigdb/human/geneset/GSE17721_0.5H_VS_4H_CPG_BMDC_DN
GSE2405_0H_VS_12H_A_PHAGOCYTOPHILUM_STIM_NEUTROPHIL_UP	199	188	0.51	1.78	0.0038023	0.031293	https://www.gsea-msigdb.org/gsea/msigdb/human/geneset/GSE2405_0H_VS_12H_A_PHAGOCYTOPHILUM_STIM_NEUTROPHIL_UP
GSE3982_EOSINOPHIL_VS_NEUTROPHIL_DN	196	182	0.46	1.78	0	0.031522	https://www.gsea-msigdb.org/gsea/msigdb/human/geneset/GSE3982_EOSINOPHIL_VS_NEUTROPHIL_DN
GSE22282_HYPOXIA_VS_NORMOXIA_MYELOID_DC_UP	200	181	0.44	1.78	0.0019417	0.031457	https://www.gsea-msigdb.org/gsea/msigdb/human/geneset/GSE22282_HYPOXIA_VS_NORMOXIA_MYELOID_DC_UP
GSE24671_CTRL_VS_SENDAI_VIRUS_INFECTED_MOUSE_SPLENOCYTES_UP	161	149	0.41	1.78	0	0.03164	https://www.gsea-msigdb.org/gsea/msigdb/human/geneset/GSE24671_CTRL_VS_SENDAI_VIRUS_INFECTED_MOUSE_SPLENOCYTES_UP
GSE13485_PRE_VS_POST_YF17D_VACCINATION_PBMC_DN	199	190	0.57	1.78	0.011673	0.031698	https://www.gsea-msigdb.org/gsea/msigdb/human/geneset/GSE13485_PRE_VS_POST_YF17D_VACCINATION_PBMC_DN
GSE7831_UNSTIM_VS_INFLUENZA_STIM_PDC_4H_UP	200	192	0.45	1.77	0.0038462	0.031851	https://www.gsea-msigdb.org/gsea/msigdb/human/geneset/GSE7831_UNSTIM_VS_INFLUENZA_STIM_PDC_4H_UP
GSE10325_MYELOID_VS_LUPUS_MYELOID_DN	200	192	0.59	1.77	0.0079051	0.031791	https://www.gsea-msigdb.org/gsea/msigdb/human/geneset/GSE10325_MYELOID_VS_LUPUS_MYELOID_DN
GSE4748_CYANOBACTERIUM_LPSLIKE_VS_LPS_AND_CYANOBACTERIUM_LPSLIKE_STIM_DC_3H_DN	194	175	0.44	1.77	0.0018182	0.032009	https://www.gsea-msigdb.org/gsea/msigdb/human/geneset/GSE4748_CYANOBACTERIUM_LPSLIKE_VS_LPS_AND_CYANOBACTERIUM_LPSLIKE_STIM_DC_3H_DN
GSE34156_UNTREATED_VS_6H_TLR1_TLR2_LIGAND_TREATED_MONOCYTE_UP	197	190	0.49	1.77	0.011742	0.031999	https://www.gsea-msigdb.org/gsea/msigdb/human/geneset/GSE34156_UNTREATED_VS_6H_TLR1_TLR2_LIGAND_TREATED_MONOCYTE_UP
GSE1432_1H_VS_24H_IFNG_MICROGLIA_DN	200	190	0.56	1.77	0.013725	0.031923	https://www.gsea-msigdb.org/gsea/msigdb/human/geneset/GSE1432_1H_VS_24H_IFNG_MICROGLIA_DN
GSE3982_EFF_MEMORY_CD4_TCELL_VS_NKCELL_DN	198	184	0.41	1.77	0.0019417	0.031925	https://www.gsea-msigdb.org/gsea/msigdb/human/geneset/GSE3982_EFF_MEMORY_CD4_TCELL_VS_NKCELL_DN
GSE22886_IGG_IGA_MEMORY_BCELL_VS_BLOOD_PLASMA_CELL_DN	198	179	0.56	1.77	0.0077821	0.031894	https://www.gsea-msigdb.org/gsea/msigdb/human/geneset/GSE22886_IGG_IGA_MEMORY_BCELL_VS_BLOOD_PLASMA_CELL_DN
GSE360_T_GONDII_VS_B_MALAYI_LOW_DOSE_DC_UP	197	185	0.46	1.77	0	0.03183	https://www.gsea-msigdb.org/gsea/msigdb/human/geneset/GSE360_T_GONDII_VS_B_MALAYI_LOW_DOSE_DC_UP
GSE17721_12H_VS_24H_POLYIC_BMDC_UP	200	190	0.49	1.77	0	0.032103	https://www.gsea-msigdb.org/gsea/msigdb/human/geneset/GSE17721_12H_VS_24H_POLYIC_BMDC_UP
GSE36888_UNTREATED_VS_IL2_TREATED_STAT5_AB_KNOCKIN_TCELL_6H_UP	194	177	0.46	1.77	0.0020121	0.032282	https://www.gsea-msigdb.org/gsea/msigdb/human/geneset/GSE36888_UNTREATED_VS_IL2_TREATED_STAT5_AB_KNOCKIN_TCELL_6H_UP
GSE18791_CTRL_VS_NEWCASTLE_VIRUS_DC_10H_DN	200	186	0.51	1.77	0.0019493	0.032444	https://www.gsea-msigdb.org/gsea/msigdb/human/geneset/GSE18791_CTRL_VS_NEWCASTLE_VIRUS_DC_10H_DN
GSE40274_CTRL_VS_FOXP3_AND_HELIOS_TRANSDUCED_ACTIVATED_CD4_TCELL_DN	200	186	0.59	1.77	0.011928	0.032412	https://www.gsea-msigdb.org/gsea/msigdb/human/geneset/GSE40274_CTRL_VS_FOXP3_AND_HELIOS_TRANSDUCED_ACTIVATED_CD4_TCELL_DN
GSE29618_MONOCYTE_VS_MDC_DAY7_FLU_VACCINE_UP	200	196	0.5	1.77	0.0077821	0.032664	https://www.gsea-msigdb.org/gsea/msigdb/human/geneset/GSE29618_MONOCYTE_VS_MDC_DAY7_FLU_VACCINE_UP
GSE2706_2H_VS_8H_LPS_STIM_DC_DN	194	179	0.49	1.77	0.0079681	0.032722	https://www.gsea-msigdb.org/gsea/msigdb/human/geneset/GSE2706_2H_VS_8H_LPS_STIM_DC_DN
GSE41867_DAY15_EFFECTOR_VS_DAY30_EXHAUSTED_CD8_TCELL_LCMV_CLONE13_UP	199	187	0.44	1.77	0	0.032694	https://www.gsea-msigdb.org/gsea/msigdb/human/geneset/GSE41867_DAY15_EFFECTOR_VS_DAY30_EXHAUSTED_CD8_TCELL_LCMV_CLONE13_UP
GSE8921_3H_VS_24H_TLR1_2_STIM_MONOCYTE_DN	200	189	0.44	1.77	0	0.032842	https://www.gsea-msigdb.org/gsea/msigdb/human/geneset/GSE8921_3H_VS_24H_TLR1_2_STIM_MONOCYTE_DN
GSE22601_DOUBLE_NEGATIVE_VS_DOUBLE_POSITIVE_THYMOCYTE_UP	197	173	0.4	1.77	0	0.032787	https://www.gsea-msigdb.org/gsea/msigdb/human/geneset/GSE22601_DOUBLE_NEGATIVE_VS_DOUBLE_POSITIVE_THYMOCYTE_UP
GSE13484_UNSTIM_VS_3H_YF17D_VACCINE_STIM_PBMC_DN	200	192	0.46	1.77	0.001992	0.033081	https://www.gsea-msigdb.org/gsea/msigdb/human/geneset/GSE13484_UNSTIM_VS_3H_YF17D_VACCINE_STIM_PBMC_DN
GSE2128_CTRL_VS_MIMETOPE_NEGATIVE_SELECTION_DP_THYMOCYTE_NOD_UP	200	188	0.46	1.77	0.013592	0.033148	https://www.gsea-msigdb.org/gsea/msigdb/human/geneset/GSE2128_CTRL_VS_MIMETOPE_NEGATIVE_SELECTION_DP_THYMOCYTE_NOD_UP
GSE22886_NAIVE_VS_IGG_IGA_MEMORY_BCELL_DN	196	182	0.52	1.77	0.0019841	0.033067	https://www.gsea-msigdb.org/gsea/msigdb/human/geneset/GSE22886_NAIVE_VS_IGG_IGA_MEMORY_BCELL_DN
GSE26495_NAIVE_VS_PD1LOW_CD8_TCELL_DN	200	191	0.46	1.77	0.0018975	0.033023	https://www.gsea-msigdb.org/gsea/msigdb/human/geneset/GSE26495_NAIVE_VS_PD1LOW_CD8_TCELL_DN
GSE37301_HEMATOPOIETIC_STEM_CELL_VS_COMMON_LYMPHOID_PROGENITOR_UP	196	187	0.4	1.77	0	0.033042	https://www.gsea-msigdb.org/gsea/msigdb/human/geneset/GSE37301_HEMATOPOIETIC_STEM_CELL_VS_COMMON_LYMPHOID_PROGENITOR_UP
GSE14415_INDUCED_TREG_VS_FAILED_INDUCED_TREG_DN	178	172	0.53	1.77	0.0081466	0.033034	https://www.gsea-msigdb.org/gsea/msigdb/human/geneset/GSE14415_INDUCED_TREG_VS_FAILED_INDUCED_TREG_DN
GSE2585_CTEC_VS_MTEC_THYMUS_DN	200	187	0.39	1.77	0.0019268	0.03312	https://www.gsea-msigdb.org/gsea/msigdb/human/geneset/GSE2585_CTEC_VS_MTEC_THYMUS_DN
GSE2770_IL12_AND_TGFB_ACT_VS_ACT_CD4_TCELL_6H_DN	198	190	0.57	1.77	0.004008	0.033201	https://www.gsea-msigdb.org/gsea/msigdb/human/geneset/GSE2770_IL12_AND_TGFB_ACT_VS_ACT_CD4_TCELL_6H_DN
GSE360_DC_VS_MAC_T_GONDII_DN	199	194	0.45	1.76	0.007767	0.033502	https://www.gsea-msigdb.org/gsea/msigdb/human/geneset/GSE360_DC_VS_MAC_T_GONDII_DN
GSE43863_DAY6_EFF_VS_DAY150_MEM_TH1_CD4_TCELL_UP	200	192	0.46	1.76	0.0018904	0.03355	https://www.gsea-msigdb.org/gsea/msigdb/human/geneset/GSE43863_DAY6_EFF_VS_DAY150_MEM_TH1_CD4_TCELL_UP
GSE2706_R848_VS_R848_AND_LPS_8H_STIM_DC_DN	197	181	0.43	1.76	0.0039139	0.033526	https://www.gsea-msigdb.org/gsea/msigdb/human/geneset/GSE2706_R848_VS_R848_AND_LPS_8H_STIM_DC_DN
GSE17721_LPS_VS_POLYIC_2H_BMDC_UP	200	195	0.48	1.76	0.0039293	0.033431	https://www.gsea-msigdb.org/gsea/msigdb/human/geneset/GSE17721_LPS_VS_POLYIC_2H_BMDC_UP
GSE22527_ANTI_CD3_INVIVO_VS_UNTREATED_MOUSE_TREG_UP	199	189	0.38	1.76	0	0.033697	https://www.gsea-msigdb.org/gsea/msigdb/human/geneset/GSE22527_ANTI_CD3_INVIVO_VS_UNTREATED_MOUSE_TREG_UP
GSE3982_DC_VS_MAC_LPS_STIM_DN	199	191	0.42	1.76	0	0.033658	https://www.gsea-msigdb.org/gsea/msigdb/human/geneset/GSE3982_DC_VS_MAC_LPS_STIM_DN
GSE17721_ALL_VS_24H_PAM3CSK4_BMDC_UP	200	186	0.47	1.76	0.0019231	0.033568	https://www.gsea-msigdb.org/gsea/msigdb/human/geneset/GSE17721_ALL_VS_24H_PAM3CSK4_BMDC_UP
GSE3565_CTRL_VS_LPS_INJECTED_DUSP1_KO_SPLENOCYTES_UP	181	172	0.45	1.76	0.0058027	0.033529	https://www.gsea-msigdb.org/gsea/msigdb/human/geneset/GSE3565_CTRL_VS_LPS_INJECTED_DUSP1_KO_SPLENOCYTES_UP
GSE15330_LYMPHOID_MULTIPOTENT_VS_MEGAKARYOCYTE_ERYTHROID_PROGENITOR_IKAROS_KO_DN	179	167	0.48	1.76	0.00998	0.034526	https://www.gsea-msigdb.org/gsea/msigdb/human/geneset/GSE15330_LYMPHOID_MULTIPOTENT_VS_MEGAKARYOCYTE_ERYTHROID_PROGENITOR_IKAROS_KO_DN
GSE21379_WT_VS_SAP_KO_CD4_TCELL_UP	200	188	0.43	1.76	0.003937	0.034776	https://www.gsea-msigdb.org/gsea/msigdb/human/geneset/GSE21379_WT_VS_SAP_KO_CD4_TCELL_UP
GSE40274_CTRL_VS_XBP1_TRANSDUCED_ACTIVATED_CD4_TCELL_UP	171	158	0.48	1.76	0.003861	0.035118	https://www.gsea-msigdb.org/gsea/msigdb/human/geneset/GSE40274_CTRL_VS_XBP1_TRANSDUCED_ACTIVATED_CD4_TCELL_UP
GSE20715_0H_VS_24H_OZONE_LUNG_DN	200	192	0.45	1.76	0.0019268	0.035185	https://www.gsea-msigdb.org/gsea/msigdb/human/geneset/GSE20715_0H_VS_24H_OZONE_LUNG_DN
GSE21546_SAP1A_KO_VS_SAP1A_KO_AND_ELK1_KO_ANTI_CD3_STIM_DP_THYMOCYTES_DN	200	191	0.46	1.76	0	0.035187	https://www.gsea-msigdb.org/gsea/msigdb/human/geneset/GSE21546_SAP1A_KO_VS_SAP1A_KO_AND_ELK1_KO_ANTI_CD3_STIM_DP_THYMOCYTES_DN
GSE24634_TREG_VS_TCONV_POST_DAY3_IL4_CONVERSION_DN	200	194	0.5	1.76	0.013566	0.0351	https://www.gsea-msigdb.org/gsea/msigdb/human/geneset/GSE24634_TREG_VS_TCONV_POST_DAY3_IL4_CONVERSION_DN
GSE17322_CD103_POS_VS_CD11B_HIGH_LUNG_DC_UP	196	185	0.47	1.76	0	0.036075	https://www.gsea-msigdb.org/gsea/msigdb/human/geneset/GSE17322_CD103_POS_VS_CD11B_HIGH_LUNG_DC_UP
GSE40666_UNTREATED_VS_IFNA_STIM_STAT4_KO_EFFECTOR_CD8_TCELL_90MIN_UP	200	188	0.47	1.76	0.0060606	0.03597	https://www.gsea-msigdb.org/gsea/msigdb/human/geneset/GSE40666_UNTREATED_VS_IFNA_STIM_STAT4_KO_EFFECTOR_CD8_TCELL_90MIN_UP
GSE26890_CXCR1_NEG_VS_POS_EFFECTOR_CD8_TCELL_UP	200	181	0.53	1.76	0.005988	0.036265	https://www.gsea-msigdb.org/gsea/msigdb/human/geneset/GSE26890_CXCR1_NEG_VS_POS_EFFECTOR_CD8_TCELL_UP
GSE9509_10MIN_VS_30MIN_LPS_AND_IL10_STIM_IL10_KO_MACROPHAGE_DN	159	150	0.46	1.76	0.0019646	0.036195	https://www.gsea-msigdb.org/gsea/msigdb/human/geneset/GSE9509_10MIN_VS_30MIN_LPS_AND_IL10_STIM_IL10_KO_MACROPHAGE_DN
GSE2706_2H_VS_8H_R848_STIM_DC_UP	194	185	0.45	1.75	0.0057582	0.036232	https://www.gsea-msigdb.org/gsea/msigdb/human/geneset/GSE2706_2H_VS_8H_R848_STIM_DC_UP
GSE22140_GERMFREE_VS_SPF_ARTHRITIC_MOUSE_CD4_TCELL_DN	199	187	0.54	1.75	0.015534	0.036251	https://www.gsea-msigdb.org/gsea/msigdb/human/geneset/GSE22140_GERMFREE_VS_SPF_ARTHRITIC_MOUSE_CD4_TCELL_DN
GSE33162_HDAC3_KO_VS_HDAC3_KO_MACROPHAGE_UP	199	190	0.47	1.75	0.0058252	0.036211	https://www.gsea-msigdb.org/gsea/msigdb/human/geneset/GSE33162_HDAC3_KO_VS_HDAC3_KO_MACROPHAGE_UP
GSE11057_NAIVE_VS_MEMORY_CD4_TCELL_DN	198	190	0.5	1.75	0.002008	0.036132	https://www.gsea-msigdb.org/gsea/msigdb/human/geneset/GSE11057_NAIVE_VS_MEMORY_CD4_TCELL_DN
GSE17974_0H_VS_4H_IN_VITRO_ACT_CD4_TCELL_DN	199	190	0.56	1.75	0.011834	0.036271	https://www.gsea-msigdb.org/gsea/msigdb/human/geneset/GSE17974_0H_VS_4H_IN_VITRO_ACT_CD4_TCELL_DN
GSE3039_CD4_TCELL_VS_B1_BCELL_UP	200	190	0.42	1.75	0	0.03652	https://www.gsea-msigdb.org/gsea/msigdb/human/geneset/GSE3039_CD4_TCELL_VS_B1_BCELL_UP
GSE37533_PPARG1_FOXP3_VS_FOXP3_TRANSDUCED_CD4_TCELL_DN	200	190	0.61	1.75	0.019763	0.036494	https://www.gsea-msigdb.org/gsea/msigdb/human/geneset/GSE37533_PPARG1_FOXP3_VS_FOXP3_TRANSDUCED_CD4_TCELL_DN
GSE17721_CTRL_VS_CPG_4H_BMDC_DN	200	186	0.42	1.75	0	0.036501	https://www.gsea-msigdb.org/gsea/msigdb/human/geneset/GSE17721_CTRL_VS_CPG_4H_BMDC_DN
GSE30971_WBP7_HET_VS_KO_MACROPHAGE_DN	199	187	0.49	1.75	0	0.036476	https://www.gsea-msigdb.org/gsea/msigdb/human/geneset/GSE30971_WBP7_HET_VS_KO_MACROPHAGE_DN
GSE22589_HEALTHY_VS_HIV_INFECTED_DC_DN	200	187	0.47	1.75	0	0.036455	https://www.gsea-msigdb.org/gsea/msigdb/human/geneset/GSE22589_HEALTHY_VS_HIV_INFECTED_DC_DN
GSE27241_CTRL_VS_DIGOXIN_TREATED_CD4_TCELL_IN_TH17_POLARIZING_CONDITIONS_DN	197	186	0.47	1.75	0.0039216	0.036614	https://www.gsea-msigdb.org/gsea/msigdb/human/geneset/GSE27241_CTRL_VS_DIGOXIN_TREATED_CD4_TCELL_IN_TH17_POLARIZING_CONDITIONS_DN
GSE1448_CTRL_VS_ANTI_VBETA5_DP_THYMOCYTE_DN	200	190	0.46	1.75	0	0.036749	https://www.gsea-msigdb.org/gsea/msigdb/human/geneset/GSE1448_CTRL_VS_ANTI_VBETA5_DP_THYMOCYTE_DN
GSE44649_WT_VS_MIR155_KO_ACTIVATED_CD8_TCELL_UP	199	189	0.48	1.75	0.003876	0.036775	https://www.gsea-msigdb.org/gsea/msigdb/human/geneset/GSE44649_WT_VS_MIR155_KO_ACTIVATED_CD8_TCELL_UP
GSE3691_IFN_PRODUCING_KILLER_DC_VS_CONVENTIONAL_DC_SPLEEN_DN	200	180	0.38	1.75	0	0.036847	https://www.gsea-msigdb.org/gsea/msigdb/human/geneset/GSE3691_IFN_PRODUCING_KILLER_DC_VS_CONVENTIONAL_DC_SPLEEN_DN
GSE3982_EFF_MEMORY_VS_CENT_MEMORY_CD4_TCELL_UP	196	182	0.39	1.75	0.0019011	0.036751	https://www.gsea-msigdb.org/gsea/msigdb/human/geneset/GSE3982_EFF_MEMORY_VS_CENT_MEMORY_CD4_TCELL_UP
GSE22886_NAIVE_TCELL_VS_NEUTROPHIL_DN	199	186	0.47	1.75	0.015968	0.036785	https://www.gsea-msigdb.org/gsea/msigdb/human/geneset/GSE22886_NAIVE_TCELL_VS_NEUTROPHIL_DN
GSE13946_CTRL_VS_DSS_COLITIS_GD_TCELL_FROM_COLON_UP	178	166	0.46	1.75	0.0081301	0.037002	https://www.gsea-msigdb.org/gsea/msigdb/human/geneset/GSE13946_CTRL_VS_DSS_COLITIS_GD_TCELL_FROM_COLON_UP
GSE32034_LY6C_HIGH_VS_LOW_ROSIGLIZATONE_TREATED_MONOCYTE_DN	200	193	0.43	1.75	0	0.037339	https://www.gsea-msigdb.org/gsea/msigdb/human/geneset/GSE32034_LY6C_HIGH_VS_LOW_ROSIGLIZATONE_TREATED_MONOCYTE_DN
GSE23321_CENTRAL_MEMORY_VS_NAIVE_CD8_TCELL_UP	199	192	0.43	1.75	0	0.037293	https://www.gsea-msigdb.org/gsea/msigdb/human/geneset/GSE23321_CENTRAL_MEMORY_VS_NAIVE_CD8_TCELL_UP
GSE28737_WT_VS_BCL6_HET_MARGINAL_ZONE_BCELL_DN	200	184	0.43	1.75	0	0.037219	https://www.gsea-msigdb.org/gsea/msigdb/human/geneset/GSE28737_WT_VS_BCL6_HET_MARGINAL_ZONE_BCELL_DN
GSE17721_PAM3CSK4_VS_CPG_12H_BMDC_DN	200	188	0.43	1.75	0.0019011	0.037557	https://www.gsea-msigdb.org/gsea/msigdb/human/geneset/GSE17721_PAM3CSK4_VS_CPG_12H_BMDC_DN
GSE39820_IL1B_IL6_VS_IL1B_IL6_IL23A_TREATED_CD4_TCELL_DN	200	184	0.4	1.75	0.0019724	0.037529	https://www.gsea-msigdb.org/gsea/msigdb/human/geneset/GSE39820_IL1B_IL6_VS_IL1B_IL6_IL23A_TREATED_CD4_TCELL_DN
GSE22601_IMMATURE_CD4_SINGLE_POSITIVE_VS_CD8_SINGLE_POSITIVE_THYMOCYTE_DN	200	190	0.54	1.75	0.0039761	0.037437	https://www.gsea-msigdb.org/gsea/msigdb/human/geneset/GSE22601_IMMATURE_CD4_SINGLE_POSITIVE_VS_CD8_SINGLE_POSITIVE_THYMOCYTE_DN
GSE9650_EXHAUSTED_VS_MEMORY_CD8_TCELL_UP	200	188	0.4	1.75	0	0.037392	https://www.gsea-msigdb.org/gsea/msigdb/human/geneset/GSE9650_EXHAUSTED_VS_MEMORY_CD8_TCELL_UP
GSE9037_CTRL_VS_LPS_4H_STIM_IRAK4_KO_BMDM_DN	200	186	0.46	1.75	0	0.037291	https://www.gsea-msigdb.org/gsea/msigdb/human/geneset/GSE9037_CTRL_VS_LPS_4H_STIM_IRAK4_KO_BMDM_DN
GSE1740_UNSTIM_VS_IFNA_STIMULATED_MCSF_IFNG_DERIVED_MACROPHAGE_UP	194	181	0.4	1.75	0	0.037675	https://www.gsea-msigdb.org/gsea/msigdb/human/geneset/GSE1740_UNSTIM_VS_IFNA_STIMULATED_MCSF_IFNG_DERIVED_MACROPHAGE_UP
GSE2405_HEAT_KILLED_LYSATE_VS_LIVE_A_PHAGOCYTOPHILUM_STIM_NEUTROPHIL_24H_UP	200	194	0.44	1.74	0.007767	0.038074	https://www.gsea-msigdb.org/gsea/msigdb/human/geneset/GSE2405_HEAT_KILLED_LYSATE_VS_LIVE_A_PHAGOCYTOPHILUM_STIM_NEUTROPHIL_24H_UP
KAECH_NAIVE_VS_DAY15_EFF_CD8_TCELL_DN	200	188	0.49	1.74	0.004	0.038113	https://www.gsea-msigdb.org/gsea/msigdb/human/geneset/KAECH_NAIVE_VS_DAY15_EFF_CD8_TCELL_DN
GSE43955_10H_VS_30H_ACT_CD4_TCELL_WITH_TGFB_IL6_DN	199	187	0.41	1.74	0	0.038112	https://www.gsea-msigdb.org/gsea/msigdb/human/geneset/GSE43955_10H_VS_30H_ACT_CD4_TCELL_WITH_TGFB_IL6_DN
GSE32164_RESTING_DIFFERENTIATED_VS_ALTERNATIVELY_ACT_M2_MACROPHAGE_UP	200	189	0.49	1.74	0.03675	0.038484	https://www.gsea-msigdb.org/gsea/msigdb/human/geneset/GSE32164_RESTING_DIFFERENTIATED_VS_ALTERNATIVELY_ACT_M2_MACROPHAGE_UP
GSE5589_LPS_AND_IL10_VS_LPS_AND_IL6_STIM_MACROPHAGE_45MIN_DN	200	191	0.51	1.74	0.0060852	0.038643	https://www.gsea-msigdb.org/gsea/msigdb/human/geneset/GSE5589_LPS_AND_IL10_VS_LPS_AND_IL6_STIM_MACROPHAGE_45MIN_DN
GSE17721_PAM3CSK4_VS_GADIQUIMOD_12H_BMDC_DN	200	193	0.45	1.74	0	0.03864	https://www.gsea-msigdb.org/gsea/msigdb/human/geneset/GSE17721_PAM3CSK4_VS_GADIQUIMOD_12H_BMDC_DN
GSE30971_CTRL_VS_LPS_STIM_MACROPHAGE_WBP7_KO_2H_UP	196	183	0.52	1.74	0.017857	0.039089	https://www.gsea-msigdb.org/gsea/msigdb/human/geneset/GSE30971_CTRL_VS_LPS_STIM_MACROPHAGE_WBP7_KO_2H_UP
GSE19923_E2A_KO_VS_E2A_AND_HEB_KO_DP_THYMOCYTE_DN	200	187	0.46	1.74	0	0.039201	https://www.gsea-msigdb.org/gsea/msigdb/human/geneset/GSE19923_E2A_KO_VS_E2A_AND_HEB_KO_DP_THYMOCYTE_DN
GSE35685_CD34POS_CD38NEG_VS_CD34POS_CD10NEG_CD62LPOS_BONE_MARROW_DN	200	193	0.4	1.74	0.0018939	0.039286	https://www.gsea-msigdb.org/gsea/msigdb/human/geneset/GSE35685_CD34POS_CD38NEG_VS_CD34POS_CD10NEG_CD62LPOS_BONE_MARROW_DN
GSE17721_CTRL_VS_POLYIC_12H_BMDC_DN	200	189	0.43	1.74	0	0.039259	https://www.gsea-msigdb.org/gsea/msigdb/human/geneset/GSE17721_CTRL_VS_POLYIC_12H_BMDC_DN
GSE41176_WT_VS_TAK1_KO_ANTI_IGM_STIM_BCELL_6H_DN	199	193	0.54	1.74	0.0099206	0.039219	https://www.gsea-msigdb.org/gsea/msigdb/human/geneset/GSE41176_WT_VS_TAK1_KO_ANTI_IGM_STIM_BCELL_6H_DN
GSE11057_PBMC_VS_MEM_CD4_TCELL_UP	197	189	0.47	1.74	0.013672	0.03932	https://www.gsea-msigdb.org/gsea/msigdb/human/geneset/GSE11057_PBMC_VS_MEM_CD4_TCELL_UP
GSE17721_CTRL_VS_PAM3CSK4_12H_BMDC_DN	199	187	0.45	1.74	0	0.039795	https://www.gsea-msigdb.org/gsea/msigdb/human/geneset/GSE17721_CTRL_VS_PAM3CSK4_12H_BMDC_DN
GSE42088_UNINF_VS_LEISHMANIA_INF_DC_8H_UP	200	193	0.47	1.74	0.0019342	0.039715	https://www.gsea-msigdb.org/gsea/msigdb/human/geneset/GSE42088_UNINF_VS_LEISHMANIA_INF_DC_8H_UP
GSE3982_MAST_CELL_VS_DC_DN	199	190	0.41	1.74	0.0019305	0.03963	https://www.gsea-msigdb.org/gsea/msigdb/human/geneset/GSE3982_MAST_CELL_VS_DC_DN
GSE360_DC_VS_MAC_B_MALAYI_HIGH_DOSE_DN	200	192	0.52	1.74	0.015474	0.03966	https://www.gsea-msigdb.org/gsea/msigdb/human/geneset/GSE360_DC_VS_MAC_B_MALAYI_HIGH_DOSE_DN
GSE34006_WT_VS_A2AR_KO_TREG_DN	200	185	0.51	1.74	0.0039683	0.039706	https://www.gsea-msigdb.org/gsea/msigdb/human/geneset/GSE34006_WT_VS_A2AR_KO_TREG_DN
GSE43955_TGFB_IL6_VS_TGFB_IL6_IL23_TH17_ACT_CD4_TCELL_60H_DN	200	190	0.42	1.74	0	0.039792	https://www.gsea-msigdb.org/gsea/msigdb/human/geneset/GSE43955_TGFB_IL6_VS_TGFB_IL6_IL23_TH17_ACT_CD4_TCELL_60H_DN
GSE22886_NAIVE_VS_IGM_MEMORY_BCELL_DN	197	188	0.51	1.74	0.008016	0.039916	https://www.gsea-msigdb.org/gsea/msigdb/human/geneset/GSE22886_NAIVE_VS_IGM_MEMORY_BCELL_DN
GSE43955_TH0_VS_TGFB_IL6_TH17_ACT_CD4_TCELL_10H_UP	200	194	0.42	1.74	0	0.040637	https://www.gsea-msigdb.org/gsea/msigdb/human/geneset/GSE43955_TH0_VS_TGFB_IL6_TH17_ACT_CD4_TCELL_10H_UP
GSE25123_IL4_VS_IL4_AND_ROSIGLITAZONE_STIM_MACROPHAGE_DAY10_UP	200	193	0.4	1.73	0.0019569	0.041134	https://www.gsea-msigdb.org/gsea/msigdb/human/geneset/GSE25123_IL4_VS_IL4_AND_ROSIGLITAZONE_STIM_MACROPHAGE_DAY10_UP
GSE11864_CSF1_VS_CSF1_IFNG_IN_MAC_DN	196	179	0.49	1.73	0.011858	0.041103	https://www.gsea-msigdb.org/gsea/msigdb/human/geneset/GSE11864_CSF1_VS_CSF1_IFNG_IN_MAC_DN
GSE1460_INTRATHYMIC_T_PROGENITOR_VS_CD4_THYMOCYTE_DN	199	196	0.46	1.73	0.0057361	0.041158	https://www.gsea-msigdb.org/gsea/msigdb/human/geneset/GSE1460_INTRATHYMIC_T_PROGENITOR_VS_CD4_THYMOCYTE_DN
GSE20366_TREG_VS_NAIVE_CD4_TCELL_HOMEOSTATIC_CONVERSION_UP	200	183	0.46	1.73	0.0040568	0.041093	https://www.gsea-msigdb.org/gsea/msigdb/human/geneset/GSE20366_TREG_VS_NAIVE_CD4_TCELL_HOMEOSTATIC_CONVERSION_UP
GSE16266_LPS_VS_HEATSHOCK_AND_LPS_STIM_MEF_UP	199	190	0.43	1.73	0	0.041114	https://www.gsea-msigdb.org/gsea/msigdb/human/geneset/GSE16266_LPS_VS_HEATSHOCK_AND_LPS_STIM_MEF_UP
GSE17721_LPS_VS_CPG_1H_BMDC_DN	200	195	0.43	1.73	0.0019841	0.041016	https://www.gsea-msigdb.org/gsea/msigdb/human/geneset/GSE17721_LPS_VS_CPG_1H_BMDC_DN
GSE17974_IL4_AND_ANTI_IL12_VS_UNTREATED_24H_ACT_CD4_TCELL_DN	194	181	0.45	1.73	0.0076482	0.040935	https://www.gsea-msigdb.org/gsea/msigdb/human/geneset/GSE17974_IL4_AND_ANTI_IL12_VS_UNTREATED_24H_ACT_CD4_TCELL_DN
GSE24634_IL4_VS_CTRL_TREATED_NAIVE_CD4_TCELL_DAY7_DN	200	185	0.47	1.73	0.0078585	0.040867	https://www.gsea-msigdb.org/gsea/msigdb/human/geneset/GSE24634_IL4_VS_CTRL_TREATED_NAIVE_CD4_TCELL_DAY7_DN
GSE17580_UNINFECTED_VS_S_MANSONI_INF_TEFF_DN	200	183	0.43	1.73	0.0020161	0.040791	https://www.gsea-msigdb.org/gsea/msigdb/human/geneset/GSE17580_UNINFECTED_VS_S_MANSONI_INF_TEFF_DN
GSE37533_PPARG2_FOXP3_VS_FOXP3_TRANSDUCED_CD4_TCELL_DN	198	186	0.6	1.73	0.021956	0.040787	https://www.gsea-msigdb.org/gsea/msigdb/human/geneset/GSE37533_PPARG2_FOXP3_VS_FOXP3_TRANSDUCED_CD4_TCELL_DN
GSE30083_SP1_VS_SP2_THYMOCYTE_UP	200	184	0.42	1.73	0	0.040842	https://www.gsea-msigdb.org/gsea/msigdb/human/geneset/GSE30083_SP1_VS_SP2_THYMOCYTE_UP
GSE29618_BCELL_VS_MDC_DAY7_FLU_VACCINE_DN	200	194	0.47	1.73	0.0058824	0.040796	https://www.gsea-msigdb.org/gsea/msigdb/human/geneset/GSE29618_BCELL_VS_MDC_DAY7_FLU_VACCINE_DN
GSE37532_TREG_VS_TCONV_PPARG_KO_CD4_TCELL_FROM_LN_DN	199	190	0.53	1.73	0.011788	0.040838	https://www.gsea-msigdb.org/gsea/msigdb/human/geneset/GSE37532_TREG_VS_TCONV_PPARG_KO_CD4_TCELL_FROM_LN_DN
GSE20500_CTRL_VS_RETINOIC_ACID_TREATED_CD4_TCELL_DN	198	187	0.4	1.73	0	0.040922	https://www.gsea-msigdb.org/gsea/msigdb/human/geneset/GSE20500_CTRL_VS_RETINOIC_ACID_TREATED_CD4_TCELL_DN
GSE45365_NK_CELL_VS_CD8_TCELL_MCMV_INFECTION_DN	200	187	0.47	1.73	0.0093985	0.040892	https://www.gsea-msigdb.org/gsea/msigdb/human/geneset/GSE45365_NK_CELL_VS_CD8_TCELL_MCMV_INFECTION_DN
GSE17721_CTRL_VS_GARDIQUIMOD_4H_BMDC_DN	200	188	0.41	1.73	0.0038168	0.041329	https://www.gsea-msigdb.org/gsea/msigdb/human/geneset/GSE17721_CTRL_VS_GARDIQUIMOD_4H_BMDC_DN
GSE360_CTRL_VS_T_GONDII_DC_DN	198	192	0.43	1.73	0	0.041543	https://www.gsea-msigdb.org/gsea/msigdb/human/geneset/GSE360_CTRL_VS_T_GONDII_DC_DN
GSE23308_CTRL_VS_CORTICOSTERONE_TREATED_MACROPHAGE_DN	200	186	0.45	1.73	0.0019646	0.041869	https://www.gsea-msigdb.org/gsea/msigdb/human/geneset/GSE23308_CTRL_VS_CORTICOSTERONE_TREATED_MACROPHAGE_DN
GSE6269_FLU_VS_E_COLI_INF_PBMC_UP	164	153	0.53	1.73	0.011976	0.041854	https://www.gsea-msigdb.org/gsea/msigdb/human/geneset/GSE6269_FLU_VS_E_COLI_INF_PBMC_UP
GSE15330_HSC_VS_LYMPHOID_PRIMED_MULTIPOTENT_PROGENITOR_UP	200	190	0.45	1.73	0	0.041769	https://www.gsea-msigdb.org/gsea/msigdb/human/geneset/GSE15330_HSC_VS_LYMPHOID_PRIMED_MULTIPOTENT_PROGENITOR_UP
GSE360_T_GONDII_VS_B_MALAYI_HIGH_DOSE_DC_UP	198	188	0.47	1.73	0	0.04187	https://www.gsea-msigdb.org/gsea/msigdb/human/geneset/GSE360_T_GONDII_VS_B_MALAYI_HIGH_DOSE_DC_UP
GSE22589_SIV_VS_HIV_AND_SIV_INFECTED_DC_UP	200	186	0.42	1.73	0	0.041814	https://www.gsea-msigdb.org/gsea/msigdb/human/geneset/GSE22589_SIV_VS_HIV_AND_SIV_INFECTED_DC_UP
GSE10325_BCELL_VS_LUPUS_BCELL_DN	200	189	0.59	1.73	0.023762	0.041816	https://www.gsea-msigdb.org/gsea/msigdb/human/geneset/GSE10325_BCELL_VS_LUPUS_BCELL_DN
GSE24634_TEFF_VS_TCONV_DAY10_IN_CULTURE_DN	200	197	0.47	1.73	0.015385	0.04212	https://www.gsea-msigdb.org/gsea/msigdb/human/geneset/GSE24634_TEFF_VS_TCONV_DAY10_IN_CULTURE_DN
GSE37533_PPARG1_FOXP3_VS_FOXP3_TRANSDUCED_CD4_TCELL_PIOGLITAZONE_TREATED_UP	200	193	0.49	1.73	0.019048	0.042088	https://www.gsea-msigdb.org/gsea/msigdb/human/geneset/GSE37533_PPARG1_FOXP3_VS_FOXP3_TRANSDUCED_CD4_TCELL_PIOGLITAZONE_TREATED_UP
GSE15330_HSC_VS_LYMPHOID_PRIMED_MULTIPOTENT_PROGENITOR_DN	181	167	0.51	1.73	0.0079208	0.042146	https://www.gsea-msigdb.org/gsea/msigdb/human/geneset/GSE15330_HSC_VS_LYMPHOID_PRIMED_MULTIPOTENT_PROGENITOR_DN
GSE17721_12H_VS_24H_LPS_BMDC_UP	200	189	0.42	1.73	0	0.04269	https://www.gsea-msigdb.org/gsea/msigdb/human/geneset/GSE17721_12H_VS_24H_LPS_BMDC_UP
GSE24142_EARLY_THYMIC_PROGENITOR_VS_DN2_THYMOCYTE_UP	200	192	0.43	1.72	0.0098039	0.043041	https://www.gsea-msigdb.org/gsea/msigdb/human/geneset/GSE24142_EARLY_THYMIC_PROGENITOR_VS_DN2_THYMOCYTE_UP
GSE23502_WT_VS_HDC_KO_MYELOID_DERIVED_SUPPRESSOR_CELL_BM_DN	200	193	0.46	1.72	0.002	0.043072	https://www.gsea-msigdb.org/gsea/msigdb/human/geneset/GSE23502_WT_VS_HDC_KO_MYELOID_DERIVED_SUPPRESSOR_CELL_BM_DN
GSE30083_SP3_VS_SP4_THYMOCYTE_DN	200	185	0.39	1.72	0.0018797	0.043417	https://www.gsea-msigdb.org/gsea/msigdb/human/geneset/GSE30083_SP3_VS_SP4_THYMOCYTE_DN
GSE2706_R848_VS_LPS_2H_STIM_DC_DN	187	168	0.44	1.72	0.0075758	0.043315	https://www.gsea-msigdb.org/gsea/msigdb/human/geneset/GSE2706_R848_VS_LPS_2H_STIM_DC_DN
GSE5679_RARA_AGONIST_AM580_VS_AM580_AND_ROSIGLITAZONE_TREATED_DC_DN	200	185	0.42	1.72	0.0077821	0.043241	https://www.gsea-msigdb.org/gsea/msigdb/human/geneset/GSE5679_RARA_AGONIST_AM580_VS_AM580_AND_ROSIGLITAZONE_TREATED_DC_DN
GSE11057_NAIVE_VS_EFF_MEMORY_CD4_TCELL_DN	197	189	0.48	1.72	0.0020121	0.043144	https://www.gsea-msigdb.org/gsea/msigdb/human/geneset/GSE11057_NAIVE_VS_EFF_MEMORY_CD4_TCELL_DN
GSE42021_CD24INT_VS_CD24LOW_TCONV_THYMUS_UP	199	190	0.46	1.72	0.0059524	0.043457	https://www.gsea-msigdb.org/gsea/msigdb/human/geneset/GSE42021_CD24INT_VS_CD24LOW_TCONV_THYMUS_UP
GSE11864_CSF1_IFNG_VS_CSF1_IFNG_PAM3CYS_IN_MAC_DN	195	185	0.43	1.72	0.0040486	0.043495	https://www.gsea-msigdb.org/gsea/msigdb/human/geneset/GSE11864_CSF1_IFNG_VS_CSF1_IFNG_PAM3CYS_IN_MAC_DN
GSE24634_IL4_VS_CTRL_TREATED_NAIVE_CD4_TCELL_DAY5_DN	199	194	0.49	1.72	0.019157	0.043497	https://www.gsea-msigdb.org/gsea/msigdb/human/geneset/GSE24634_IL4_VS_CTRL_TREATED_NAIVE_CD4_TCELL_DAY5_DN
GSE2770_IL12_VS_TGFB_AND_IL12_TREATED_ACT_CD4_TCELL_2H_DN	162	154	0.4	1.72	0	0.043518	https://www.gsea-msigdb.org/gsea/msigdb/human/geneset/GSE2770_IL12_VS_TGFB_AND_IL12_TREATED_ACT_CD4_TCELL_2H_DN
GSE17721_CTRL_VS_POLYIC_4H_BMDC_DN	200	186	0.44	1.72	0.0019802	0.043516	https://www.gsea-msigdb.org/gsea/msigdb/human/geneset/GSE17721_CTRL_VS_POLYIC_4H_BMDC_DN
GSE10325_LUPUS_BCELL_VS_LUPUS_MYELOID_DN	200	195	0.5	1.72	0.023857	0.04349	https://www.gsea-msigdb.org/gsea/msigdb/human/geneset/GSE10325_LUPUS_BCELL_VS_LUPUS_MYELOID_DN
GSE3982_CTRL_VS_LPS_4H_MAC_DN	199	195	0.49	1.72	0.0057915	0.043551	https://www.gsea-msigdb.org/gsea/msigdb/human/geneset/GSE3982_CTRL_VS_LPS_4H_MAC_DN
GSE31082_DP_VS_CD8_SP_THYMOCYTE_DN	200	188	0.41	1.72	0	0.043612	https://www.gsea-msigdb.org/gsea/msigdb/human/geneset/GSE31082_DP_VS_CD8_SP_THYMOCYTE_DN
GSE43863_DAY6_EFF_VS_DAY150_MEM_TH1_CD4_TCELL_DN	199	186	0.44	1.72	0.0040161	0.043578	https://www.gsea-msigdb.org/gsea/msigdb/human/geneset/GSE43863_DAY6_EFF_VS_DAY150_MEM_TH1_CD4_TCELL_DN
GSE17721_CTRL_VS_CPG_6H_BMDC_DN	200	187	0.45	1.72	0.0019646	0.043666	https://www.gsea-msigdb.org/gsea/msigdb/human/geneset/GSE17721_CTRL_VS_CPG_6H_BMDC_DN
GSE17721_PAM3CSK4_VS_GADIQUIMOD_1H_BMDC_UP	200	193	0.39	1.72	0	0.043718	https://www.gsea-msigdb.org/gsea/msigdb/human/geneset/GSE17721_PAM3CSK4_VS_GADIQUIMOD_1H_BMDC_UP
GSE7509_DC_VS_MONOCYTE_UP	200	191	0.47	1.72	0.013233	0.043843	https://www.gsea-msigdb.org/gsea/msigdb/human/geneset/GSE7509_DC_VS_MONOCYTE_UP
GSE2770_UNTREATED_VS_TGFB_AND_IL4_TREATED_ACT_CD4_TCELL_48H_DN	198	192	0.49	1.72	0.0078125	0.043895	https://www.gsea-msigdb.org/gsea/msigdb/human/geneset/GSE2770_UNTREATED_VS_TGFB_AND_IL4_TREATED_ACT_CD4_TCELL_48H_DN
GSE41867_MEMORY_VS_EXHAUSTED_CD8_TCELL_DAY30_LCMV_UP	199	187	0.44	1.72	0.0019802	0.043799	https://www.gsea-msigdb.org/gsea/msigdb/human/geneset/GSE41867_MEMORY_VS_EXHAUSTED_CD8_TCELL_DAY30_LCMV_UP
GSE16385_ROSIGLITAZONE_VS_UNTREATED_IFNG_TNF_STIM_MACROPHAGE_UP	200	183	0.37	1.72	0.0019417	0.0437	https://www.gsea-msigdb.org/gsea/msigdb/human/geneset/GSE16385_ROSIGLITAZONE_VS_UNTREATED_IFNG_TNF_STIM_MACROPHAGE_UP
GSE29618_BCELL_VS_PDC_DAY7_FLU_VACCINE_DN	198	191	0.45	1.72	0.0019685	0.043609	https://www.gsea-msigdb.org/gsea/msigdb/human/geneset/GSE29618_BCELL_VS_PDC_DAY7_FLU_VACCINE_DN
GSE12963_UNINF_VS_ENV_AND_NEF_AND_VPR_DEFICIENT_HIV1_INF_CD4_TCELL_DN	134	122	0.44	1.72	0	0.043515	https://www.gsea-msigdb.org/gsea/msigdb/human/geneset/GSE12963_UNINF_VS_ENV_AND_NEF_AND_VPR_DEFICIENT_HIV1_INF_CD4_TCELL_DN
GSE42021_TCONV_PLN_VS_CD24LO_TCONV_THYMUS_DN	200	189	0.45	1.72	0	0.043505	https://www.gsea-msigdb.org/gsea/msigdb/human/geneset/GSE42021_TCONV_PLN_VS_CD24LO_TCONV_THYMUS_DN
GSE10325_CD4_TCELL_VS_LUPUS_CD4_TCELL_DN	199	193	0.54	1.72	0.016064	0.043484	https://www.gsea-msigdb.org/gsea/msigdb/human/geneset/GSE10325_CD4_TCELL_VS_LUPUS_CD4_TCELL_DN
GSE43863_TFH_VS_LY6C_LOW_CXCR5NEG_EFFECTOR_CD4_TCELL_UP	199	189	0.51	1.72	0.002004	0.043566	https://www.gsea-msigdb.org/gsea/msigdb/human/geneset/GSE43863_TFH_VS_LY6C_LOW_CXCR5NEG_EFFECTOR_CD4_TCELL_UP
GSE360_L_DONOVANI_VS_L_MAJOR_MAC_DN	200	191	0.38	1.72	0	0.04375	https://www.gsea-msigdb.org/gsea/msigdb/human/geneset/GSE360_L_DONOVANI_VS_L_MAJOR_MAC_DN
GSE19888_ADENOSINE_A3R_INH_VS_INH_PRETREAT_AND_ACT_WITH_TCELL_MEMBRANES_MAST_CELL_UP	200	185	0.49	1.72	0.0080645	0.044142	https://www.gsea-msigdb.org/gsea/msigdb/human/geneset/GSE19888_ADENOSINE_A3R_INH_VS_INH_PRETREAT_AND_ACT_WITH_TCELL_MEMBRANES_MAST_CELL_UP
GSE3982_NKCELL_VS_TH2_UP	198	188	0.4	1.72	0.0018657	0.044203	https://www.gsea-msigdb.org/gsea/msigdb/human/geneset/GSE3982_NKCELL_VS_TH2_UP
GSE20727_ROS_INH_VS_ROS_INH_AND_DNFB_ALLERGEN_TREATED_DC_UP	199	190	0.52	1.72	0.0080321	0.044188	https://www.gsea-msigdb.org/gsea/msigdb/human/geneset/GSE20727_ROS_INH_VS_ROS_INH_AND_DNFB_ALLERGEN_TREATED_DC_UP
GSE36527_CD62L_HIGH_VS_CD62L_LOW_TREG_CD69_NEG_KLRG1_NEG_UP	200	189	0.48	1.72	0.0060484	0.044106	https://www.gsea-msigdb.org/gsea/msigdb/human/geneset/GSE36527_CD62L_HIGH_VS_CD62L_LOW_TREG_CD69_NEG_KLRG1_NEG_UP
GSE7831_UNSTIM_VS_CPG_STIM_PDC_4H_DN	200	194	0.41	1.72	0	0.044098	https://www.gsea-msigdb.org/gsea/msigdb/human/geneset/GSE7831_UNSTIM_VS_CPG_STIM_PDC_4H_DN
GSE4748_CTRL_VS_CYANOBACTERIUM_LPSLIKE_STIM_DC_3H_DN	200	190	0.52	1.72	0.015748	0.044073	https://www.gsea-msigdb.org/gsea/msigdb/human/geneset/GSE4748_CTRL_VS_CYANOBACTERIUM_LPSLIKE_STIM_DC_3H_DN
GSE22140_HEALTHY_VS_ARTHRITIC_MOUSE_CD4_TCELL_UP	199	189	0.48	1.72	0.0058027	0.044245	https://www.gsea-msigdb.org/gsea/msigdb/human/geneset/GSE22140_HEALTHY_VS_ARTHRITIC_MOUSE_CD4_TCELL_UP
GSE21670_IL6_VS_TGFB_AND_IL6_TREATED_CD4_TCELL_DN	200	195	0.42	1.72	0	0.044563	https://www.gsea-msigdb.org/gsea/msigdb/human/geneset/GSE21670_IL6_VS_TGFB_AND_IL6_TREATED_CD4_TCELL_DN
GSE2770_TGFB_AND_IL4_ACT_VS_ACT_CD4_TCELL_48H_UP	200	192	0.5	1.71	0.0041322	0.044637	https://www.gsea-msigdb.org/gsea/msigdb/human/geneset/GSE2770_TGFB_AND_IL4_ACT_VS_ACT_CD4_TCELL_48H_UP
GSE22025_TGFB1_VS_TGFB1_AND_PROGESTERONE_TREATED_CD4_TCELL_DN	199	193	0.39	1.71	0.0018248	0.044681	https://www.gsea-msigdb.org/gsea/msigdb/human/geneset/GSE22025_TGFB1_VS_TGFB1_AND_PROGESTERONE_TREATED_CD4_TCELL_DN
GSE26030_TH1_VS_TH17_DAY15_POST_POLARIZATION_DN	200	185	0.45	1.71	0.007722	0.044773	https://www.gsea-msigdb.org/gsea/msigdb/human/geneset/GSE26030_TH1_VS_TH17_DAY15_POST_POLARIZATION_DN
GSE38681_WT_VS_LYL1_KO_LYMPHOID_PRIMED_MULTIPOTENT_PROGENITOR_DN	200	188	0.52	1.71	0.015748	0.044687	https://www.gsea-msigdb.org/gsea/msigdb/human/geneset/GSE38681_WT_VS_LYL1_KO_LYMPHOID_PRIMED_MULTIPOTENT_PROGENITOR_DN
GSE3982_NEUTROPHIL_VS_NKCELL_UP	199	184	0.48	1.71	0.0099404	0.044697	https://www.gsea-msigdb.org/gsea/msigdb/human/geneset/GSE3982_NEUTROPHIL_VS_NKCELL_UP
GSE36078_WT_VS_IL1R_KO_LUNG_DC_AFTER_AD5_INF_UP	200	189	0.4	1.71	0.0039526	0.044641	https://www.gsea-msigdb.org/gsea/msigdb/human/geneset/GSE36078_WT_VS_IL1R_KO_LUNG_DC_AFTER_AD5_INF_UP
GSE7548_NAIVE_VS_DAY7_PCC_IMMUNIZATION_CD4_TCELL_DN	199	193	0.59	1.71	0.017857	0.044703	https://www.gsea-msigdb.org/gsea/msigdb/human/geneset/GSE7548_NAIVE_VS_DAY7_PCC_IMMUNIZATION_CD4_TCELL_DN
GSE11057_NAIVE_CD4_VS_PBMC_CD4_TCELL_DN	197	193	0.46	1.71	0.0079365	0.04518	https://www.gsea-msigdb.org/gsea/msigdb/human/geneset/GSE11057_NAIVE_CD4_VS_PBMC_CD4_TCELL_DN
GSE5589_LPS_VS_LPS_AND_IL10_STIM_IL10_KO_MACROPHAGE_45MIN_DN	200	192	0.46	1.71	0.0039761	0.045225	https://www.gsea-msigdb.org/gsea/msigdb/human/geneset/GSE5589_LPS_VS_LPS_AND_IL10_STIM_IL10_KO_MACROPHAGE_45MIN_DN
GSE43863_NAIVE_VS_MEMORY_TFH_CD4_TCELL_D150_LCMV_DN	200	190	0.5	1.71	0.014028	0.045223	https://www.gsea-msigdb.org/gsea/msigdb/human/geneset/GSE43863_NAIVE_VS_MEMORY_TFH_CD4_TCELL_D150_LCMV_DN
GSE45881_CXCR6HI_VS_CXCR1LO_COLONIC_LAMINA_PROPRIA_DN	199	189	0.42	1.71	0.0039293	0.045429	https://www.gsea-msigdb.org/gsea/msigdb/human/geneset/GSE45881_CXCR6HI_VS_CXCR1LO_COLONIC_LAMINA_PROPRIA_DN
GSE9988_ANTI_TREM1_VS_LOW_LPS_MONOCYTE_DN	198	192	0.51	1.71	0.011719	0.045369	https://www.gsea-msigdb.org/gsea/msigdb/human/geneset/GSE9988_ANTI_TREM1_VS_LOW_LPS_MONOCYTE_DN
GSE18791_UNSTIM_VS_NEWCATSLE_VIRUS_DC_18H_DN	192	174	0.44	1.71	0.0019724	0.045461	https://www.gsea-msigdb.org/gsea/msigdb/human/geneset/GSE18791_UNSTIM_VS_NEWCATSLE_VIRUS_DC_18H_DN
GSE32423_CTRL_VS_IL7_IL4_MEMORY_CD8_TCELL_DN	200	190	0.44	1.71	0.0019305	0.045375	https://www.gsea-msigdb.org/gsea/msigdb/human/geneset/GSE32423_CTRL_VS_IL7_IL4_MEMORY_CD8_TCELL_DN
GSE3982_BCELL_VS_NKCELL_UP	197	183	0.44	1.71	0.0077071	0.045471	https://www.gsea-msigdb.org/gsea/msigdb/human/geneset/GSE3982_BCELL_VS_NKCELL_UP
GSE2770_IL12_AND_TGFB_VS_IL4_TREATED_ACT_CD4_TCELL_2H_UP	198	187	0.49	1.71	0.002008	0.045598	https://www.gsea-msigdb.org/gsea/msigdb/human/geneset/GSE2770_IL12_AND_TGFB_VS_IL4_TREATED_ACT_CD4_TCELL_2H_UP
GSE3982_DC_VS_NKCELL_UP	200	191	0.42	1.71	0.0057582	0.045516	https://www.gsea-msigdb.org/gsea/msigdb/human/geneset/GSE3982_DC_VS_NKCELL_UP
GSE20715_0H_VS_6H_OZONE_LUNG_DN	200	191	0.39	1.71	0	0.045434	https://www.gsea-msigdb.org/gsea/msigdb/human/geneset/GSE20715_0H_VS_6H_OZONE_LUNG_DN
GSE17721_CTRL_VS_CPG_2H_BMDC_DN	200	189	0.39	1.71	0	0.045371	https://www.gsea-msigdb.org/gsea/msigdb/human/geneset/GSE17721_CTRL_VS_CPG_2H_BMDC_DN
GSE17301_CTRL_VS_48H_ACD3_ACD28_IFNA2_STIM_CD8_TCELL_UP	200	188	0.48	1.71	0.01165	0.045297	https://www.gsea-msigdb.org/gsea/msigdb/human/geneset/GSE17301_CTRL_VS_48H_ACD3_ACD28_IFNA2_STIM_CD8_TCELL_UP
GSE9037_CTRL_VS_LPS_1H_STIM_BMDM_DN	200	179	0.41	1.71	0	0.045963	https://www.gsea-msigdb.org/gsea/msigdb/human/geneset/GSE9037_CTRL_VS_LPS_1H_STIM_BMDM_DN
GSE9988_ANTI_TREM1_VS_LPS_MONOCYTE_DN	199	190	0.52	1.71	0.0098814	0.04591	https://www.gsea-msigdb.org/gsea/msigdb/human/geneset/GSE9988_ANTI_TREM1_VS_LPS_MONOCYTE_DN
GSE360_L_DONOVANI_VS_B_MALAYI_LOW_DOSE_DC_UP	199	192	0.44	1.71	0.0074349	0.045942	https://www.gsea-msigdb.org/gsea/msigdb/human/geneset/GSE360_L_DONOVANI_VS_B_MALAYI_LOW_DOSE_DC_UP
GSE8835_HEALTHY_VS_CLL_CD8_TCELL_DN	200	184	0.37	1.71	0.0019417	0.045871	https://www.gsea-msigdb.org/gsea/msigdb/human/geneset/GSE8835_HEALTHY_VS_CLL_CD8_TCELL_DN
GSE43955_10H_VS_60H_ACT_CD4_TCELL_WITH_TGFB_IL6_DN	200	185	0.43	1.71	0.0077821	0.045903	https://www.gsea-msigdb.org/gsea/msigdb/human/geneset/GSE43955_10H_VS_60H_ACT_CD4_TCELL_WITH_TGFB_IL6_DN
GSE29618_BCELL_VS_MONOCYTE_DAY7_FLU_VACCINE_DN	200	195	0.47	1.71	0.02004	0.046346	https://www.gsea-msigdb.org/gsea/msigdb/human/geneset/GSE29618_BCELL_VS_MONOCYTE_DAY7_FLU_VACCINE_DN
GSE29618_MONOCYTE_VS_PDC_DN	197	186	0.47	1.71	0	0.046391	https://www.gsea-msigdb.org/gsea/msigdb/human/geneset/GSE29618_MONOCYTE_VS_PDC_DN
GSE14415_ACT_TCONV_VS_ACT_NATURAL_TREG_DN	178	175	0.5	1.71	0.018036	0.046341	https://www.gsea-msigdb.org/gsea/msigdb/human/geneset/GSE14415_ACT_TCONV_VS_ACT_NATURAL_TREG_DN
GSE17721_PAM3CSK4_VS_CPG_4H_BMDC_DN	200	189	0.42	1.71	0	0.046498	https://www.gsea-msigdb.org/gsea/msigdb/human/geneset/GSE17721_PAM3CSK4_VS_CPG_4H_BMDC_DN
GSE20715_0H_VS_48H_OZONE_TLR4_KO_LUNG_DN	200	194	0.51	1.71	0.021569	0.046578	https://www.gsea-msigdb.org/gsea/msigdb/human/geneset/GSE20715_0H_VS_48H_OZONE_TLR4_KO_LUNG_DN
GSE2585_THYMIC_MACROPHAGE_VS_MTEC_DN	198	181	0.4	1.71	0	0.046584	https://www.gsea-msigdb.org/gsea/msigdb/human/geneset/GSE2585_THYMIC_MACROPHAGE_VS_MTEC_DN
GSE32164_RESTING_DIFFERENTIATED_VS_CMYC_INHIBITED_MACROPHAGE_UP	200	194	0.43	1.7	0	0.046789	https://www.gsea-msigdb.org/gsea/msigdb/human/geneset/GSE32164_RESTING_DIFFERENTIATED_VS_CMYC_INHIBITED_MACROPHAGE_UP
GSE3337_4H_VS_16H_IFNG_IN_CD8POS_DC_DN	200	191	0.41	1.7	0.0094697	0.04702	https://www.gsea-msigdb.org/gsea/msigdb/human/geneset/GSE3337_4H_VS_16H_IFNG_IN_CD8POS_DC_DN
GSE15330_MEGAKARYOCYTE_ERYTHROID_VS_GRANULOCYTE_MONOCYTE_PROGENITOR_IKAROS_KO_DN	199	180	0.48	1.7	0	0.046935	https://www.gsea-msigdb.org/gsea/msigdb/human/geneset/GSE15330_MEGAKARYOCYTE_ERYTHROID_VS_GRANULOCYTE_MONOCYTE_PROGENITOR_IKAROS_KO_DN
GSE33513_TCF7_KO_VS_HET_EARLY_THYMIC_PROGENITOR_UP	199	186	0.38	1.7	0	0.04686	https://www.gsea-msigdb.org/gsea/msigdb/human/geneset/GSE33513_TCF7_KO_VS_HET_EARLY_THYMIC_PROGENITOR_UP
GSE3039_NKT_CELL_VS_ALPHAALPHA_CD8_TCELL_DN	200	186	0.51	1.7	0.020913	0.047226	https://www.gsea-msigdb.org/gsea/msigdb/human/geneset/GSE3039_NKT_CELL_VS_ALPHAALPHA_CD8_TCELL_DN
GSE17721_CTRL_VS_LPS_8H_BMDC_DN	199	188	0.42	1.7	0	0.047213	https://www.gsea-msigdb.org/gsea/msigdb/human/geneset/GSE17721_CTRL_VS_LPS_8H_BMDC_DN
GSE43863_LY6C_INT_CXCR5POS_VS_LY6C_LOW_CXCR5NEG_EFFECTOR_CD4_TCELL_DN	200	189	0.42	1.7	0.0057252	0.047593	https://www.gsea-msigdb.org/gsea/msigdb/human/geneset/GSE43863_LY6C_INT_CXCR5POS_VS_LY6C_LOW_CXCR5NEG_EFFECTOR_CD4_TCELL_DN
GSE3337_CTRL_VS_4H_IFNG_IN_CD8POS_DC_DN	200	189	0.46	1.7	0.011719	0.047597	https://www.gsea-msigdb.org/gsea/msigdb/human/geneset/GSE3337_CTRL_VS_4H_IFNG_IN_CD8POS_DC_DN
GSE44955_MCSF_VS_MCSF_AND_IL27_STIM_MACROPHAGE_UP	198	184	0.49	1.7	0.0058594	0.047642	https://www.gsea-msigdb.org/gsea/msigdb/human/geneset/GSE44955_MCSF_VS_MCSF_AND_IL27_STIM_MACROPHAGE_UP
GSE14415_INDUCED_TREG_VS_FOXP3_KO_INDUCED_TREG_DN	181	165	0.44	1.7	0.01004	0.047793	https://www.gsea-msigdb.org/gsea/msigdb/human/geneset/GSE14415_INDUCED_TREG_VS_FOXP3_KO_INDUCED_TREG_DN
GSE26343_UNSTIM_VS_LPS_STIM_NFAT5_KO_MACROPHAGE_UP	198	189	0.5	1.7	0.011976	0.048049	https://www.gsea-msigdb.org/gsea/msigdb/human/geneset/GSE26343_UNSTIM_VS_LPS_STIM_NFAT5_KO_MACROPHAGE_UP
GSE27786_CD4_VS_CD8_TCELL_UP	200	194	0.41	1.7	0	0.048138	https://www.gsea-msigdb.org/gsea/msigdb/human/geneset/GSE27786_CD4_VS_CD8_TCELL_UP
GSE6269_FLU_VS_STREP_PNEUMO_INF_PBMC_UP	170	163	0.54	1.7	0.032064	0.04814	https://www.gsea-msigdb.org/gsea/msigdb/human/geneset/GSE6269_FLU_VS_STREP_PNEUMO_INF_PBMC_UP
GSE6259_DEC205_POS_DC_VS_BCELL_DN	172	167	0.53	1.7	0.01004	0.048163	https://www.gsea-msigdb.org/gsea/msigdb/human/geneset/GSE6259_DEC205_POS_DC_VS_BCELL_DN
GSE3039_CD4_TCELL_VS_B1_BCELL_DN	200	186	0.41	1.7	0.0057252	0.048074	https://www.gsea-msigdb.org/gsea/msigdb/human/geneset/GSE3039_CD4_TCELL_VS_B1_BCELL_DN
GSE17721_CTRL_VS_PAM3CSK4_8H_BMDC_DN	200	192	0.41	1.7	0.0039448	0.04872	https://www.gsea-msigdb.org/gsea/msigdb/human/geneset/GSE17721_CTRL_VS_PAM3CSK4_8H_BMDC_DN
GSE19198_1H_VS_24H_IL21_TREATED_TCELL_DN	200	190	0.45	1.7	0.0056391	0.04863	https://www.gsea-msigdb.org/gsea/msigdb/human/geneset/GSE19198_1H_VS_24H_IL21_TREATED_TCELL_DN
GSE24142_DN2_VS_DN3_THYMOCYTE_UP	200	189	0.39	1.7	0.003876	0.048578	https://www.gsea-msigdb.org/gsea/msigdb/human/geneset/GSE24142_DN2_VS_DN3_THYMOCYTE_UP
GSE17721_LPS_VS_CPG_16H_BMDC_UP	200	189	0.42	1.7	0	0.048485	https://www.gsea-msigdb.org/gsea/msigdb/human/geneset/GSE17721_LPS_VS_CPG_16H_BMDC_UP
GSE18791_CTRL_VS_NEWCASTLE_VIRUS_DC_12H_DN	198	183	0.46	1.7	0.011561	0.048921	https://www.gsea-msigdb.org/gsea/msigdb/human/geneset/GSE18791_CTRL_VS_NEWCASTLE_VIRUS_DC_12H_DN
GSE29949_MICROGLIA_VS_DC_BRAIN_UP	199	190	0.46	1.7	0	0.048875	https://www.gsea-msigdb.org/gsea/msigdb/human/geneset/GSE29949_MICROGLIA_VS_DC_BRAIN_UP
GSE3982_NEUTROPHIL_VS_CENT_MEMORY_CD4_TCELL_UP	200	194	0.46	1.7	0.011696	0.049157	https://www.gsea-msigdb.org/gsea/msigdb/human/geneset/GSE3982_NEUTROPHIL_VS_CENT_MEMORY_CD4_TCELL_UP
GSE2585_CD80_HIGH_VS_LOW_AIRE_KO_MTEC_UP	200	181	0.38	1.7	0.0056285	0.049465	https://www.gsea-msigdb.org/gsea/msigdb/human/geneset/GSE2585_CD80_HIGH_VS_LOW_AIRE_KO_MTEC_UP
GSE11961_PLASMA_CELL_DAY7_VS_MEMORY_BCELL_DAY40_DN	198	185	0.39	1.7	0	0.049692	https://www.gsea-msigdb.org/gsea/msigdb/human/geneset/GSE11961_PLASMA_CELL_DAY7_VS_MEMORY_BCELL_DAY40_DN
GSE360_DC_VS_MAC_B_MALAYI_LOW_DOSE_DN	200	193	0.45	1.7	0	0.049728	https://www.gsea-msigdb.org/gsea/msigdb/human/geneset/GSE360_DC_VS_MAC_B_MALAYI_LOW_DOSE_DN
GSE21927_SPLEEN_C57BL6_VS_4T1_TUMOR_BALBC_MONOCYTES_DN	200	192	0.52	1.7	0.02544	0.049651	https://www.gsea-msigdb.org/gsea/msigdb/human/geneset/GSE21927_SPLEEN_C57BL6_VS_4T1_TUMOR_BALBC_MONOCYTES_DN
GSE43955_1H_VS_10H_ACT_CD4_TCELL_WITH_TGFB_IL6_UP	199	186	0.39	1.69	0	0.049694	https://www.gsea-msigdb.org/gsea/msigdb/human/geneset/GSE43955_1H_VS_10H_ACT_CD4_TCELL_WITH_TGFB_IL6_UP
GSE23308_WT_VS_MINERALCORTICOID_REC_KO_MACROPHAGE_DN	200	189	0.48	1.69	0.0058939	0.04972	https://www.gsea-msigdb.org/gsea/msigdb/human/geneset/GSE23308_WT_VS_MINERALCORTICOID_REC_KO_MACROPHAGE_DN
GSE1925_CTRL_VS_3H_IFNG_STIM_MACROPHAGE_UP	200	189	0.48	1.69	0.0097087	0.049802	https://www.gsea-msigdb.org/gsea/msigdb/human/geneset/GSE1925_CTRL_VS_3H_IFNG_STIM_MACROPHAGE_UP
GSE29618_PDC_VS_MDC_DAY7_FLU_VACCINE_UP	199	191	0.47	1.69	0.012121	0.049778	https://www.gsea-msigdb.org/gsea/msigdb/human/geneset/GSE29618_PDC_VS_MDC_DAY7_FLU_VACCINE_UP
GSE7831_1H_VS_4H_INFLUENZA_STIM_PDC_DN	199	186	0.39	1.69	0.0018727	0.049922	https://www.gsea-msigdb.org/gsea/msigdb/human/geneset/GSE7831_1H_VS_4H_INFLUENZA_STIM_PDC_DN
GSE2770_TGFB_AND_IL4_VS_IL12_TREATED_ACT_CD4_TCELL_2H_DN	197	188	0.41	1.69	0	0.049842	https://www.gsea-msigdb.org/gsea/msigdb/human/geneset/GSE2770_TGFB_AND_IL4_VS_IL12_TREATED_ACT_CD4_TCELL_2H_DN
GSE5589_WT_VS_IL6_KO_LPS_STIM_MACROPHAGE_45MIN_DN	200	190	0.37	1.69	0	0.049854	https://www.gsea-msigdb.org/gsea/msigdb/human/geneset/GSE5589_WT_VS_IL6_KO_LPS_STIM_MACROPHAGE_45MIN_DN
GSE45739_NRAS_KO_VS_WT_UNSTIM_CD4_TCELL_UP	200	187	0.54	1.69	0.032323	0.049765	https://www.gsea-msigdb.org/gsea/msigdb/human/geneset/GSE45739_NRAS_KO_VS_WT_UNSTIM_CD4_TCELL_UP
GSE17721_PAM3CSK4_VS_CPG_16H_BMDC_DN	199	186	0.41	1.69	0.0019194	0.049895	https://www.gsea-msigdb.org/gsea/msigdb/human/geneset/GSE17721_PAM3CSK4_VS_CPG_16H_BMDC_DN
GSE360_L_DONOVANI_VS_M_TUBERCULOSIS_MAC_UP	200	194	0.38	1.69	0	0.049849	https://www.gsea-msigdb.org/gsea/msigdb/human/geneset/GSE360_L_DONOVANI_VS_M_TUBERCULOSIS_MAC_UP
GSE29618_BCELL_VS_MONOCYTE_DN	200	191	0.48	1.69	0.01996	0.050287	https://www.gsea-msigdb.org/gsea/msigdb/human/geneset/GSE29618_BCELL_VS_MONOCYTE_DN
GSE27670_CTRL_VS_LMP1_TRANSDUCED_GC_BCELL_UP	200	187	0.41	1.69	0.0078431	0.050305	https://www.gsea-msigdb.org/gsea/msigdb/human/geneset/GSE27670_CTRL_VS_LMP1_TRANSDUCED_GC_BCELL_UP
GSE3982_MEMORY_CD4_TCELL_VS_BCELL_DN	197	191	0.49	1.69	0.021696	0.050397	https://www.gsea-msigdb.org/gsea/msigdb/human/geneset/GSE3982_MEMORY_CD4_TCELL_VS_BCELL_DN
GSE40274_CTRL_VS_FOXP3_AND_EOS_TRANSDUCED_ACTIVATED_CD4_TCELL_UP	169	157	0.42	1.69	0.0019268	0.050541	https://www.gsea-msigdb.org/gsea/msigdb/human/geneset/GSE40274_CTRL_VS_FOXP3_AND_EOS_TRANSDUCED_ACTIVATED_CD4_TCELL_UP
GSE2770_TGFB_AND_IL4_VS_IL12_TREATED_ACT_CD4_TCELL_6H_UP	200	190	0.45	1.69	0.0019841	0.050487	https://www.gsea-msigdb.org/gsea/msigdb/human/geneset/GSE2770_TGFB_AND_IL4_VS_IL12_TREATED_ACT_CD4_TCELL_6H_UP
GSE10147_IL3_VS_IL3_AND_CPG_STIM_PDC_UP	147	137	0.41	1.69	0.0019305	0.050395	https://www.gsea-msigdb.org/gsea/msigdb/human/geneset/GSE10147_IL3_VS_IL3_AND_CPG_STIM_PDC_UP
GSE17721_LPS_VS_GARDIQUIMOD_16H_BMDC_DN	200	189	0.42	1.69	0	0.050624	https://www.gsea-msigdb.org/gsea/msigdb/human/geneset/GSE17721_LPS_VS_GARDIQUIMOD_16H_BMDC_DN
GSE8621_UNSTIM_VS_LPS_PRIMED_AND_LPS_STIM_MACROPHAGE_UP	199	188	0.43	1.69	0.0019646	0.051241	https://www.gsea-msigdb.org/gsea/msigdb/human/geneset/GSE8621_UNSTIM_VS_LPS_PRIMED_AND_LPS_STIM_MACROPHAGE_UP
GSE19401_UNSTIM_VS_RETINOIC_ACID_AND_PAM2CSK4_STIM_FOLLICULAR_DC_UP	200	191	0.47	1.69	0.01518	0.051373	https://www.gsea-msigdb.org/gsea/msigdb/human/geneset/GSE19401_UNSTIM_VS_RETINOIC_ACID_AND_PAM2CSK4_STIM_FOLLICULAR_DC_UP
GSE46242_CTRL_VS_EGR2_DELETED_ANERGIC_TH1_CD4_TCELL_DN	197	182	0.45	1.69	0.003861	0.051455	https://www.gsea-msigdb.org/gsea/msigdb/human/geneset/GSE46242_CTRL_VS_EGR2_DELETED_ANERGIC_TH1_CD4_TCELL_DN
GSE24634_TEFF_VS_TCONV_DAY3_IN_CULTURE_DN	200	188	0.47	1.69	0.02907	0.051885	https://www.gsea-msigdb.org/gsea/msigdb/human/geneset/GSE24634_TEFF_VS_TCONV_DAY3_IN_CULTURE_DN
GSE17721_PAM3CSK4_VS_GADIQUIMOD_16H_BMDC_DN	200	190	0.44	1.69	0.0020161	0.052053	https://www.gsea-msigdb.org/gsea/msigdb/human/geneset/GSE17721_PAM3CSK4_VS_GADIQUIMOD_16H_BMDC_DN
GSE17721_4_VS_24H_GARDIQUIMOD_BMDC_UP	200	190	0.4	1.69	0.0019802	0.052188	https://www.gsea-msigdb.org/gsea/msigdb/human/geneset/GSE17721_4_VS_24H_GARDIQUIMOD_BMDC_UP
GSE26030_UNSTIM_VS_RESTIM_TH1_DAY5_POST_POLARIZATION_DN	200	184	0.42	1.69	0.0038462	0.052224	https://www.gsea-msigdb.org/gsea/msigdb/human/geneset/GSE26030_UNSTIM_VS_RESTIM_TH1_DAY5_POST_POLARIZATION_DN
GSE19401_UNSTIM_VS_RETINOIC_ACID_STIM_FOLLICULAR_DC_DN	196	185	0.41	1.69	0.0078585	0.05226	https://www.gsea-msigdb.org/gsea/msigdb/human/geneset/GSE19401_UNSTIM_VS_RETINOIC_ACID_STIM_FOLLICULAR_DC_DN
GSE14415_NATURAL_TREG_VS_FOXP3_KO_NATURAL_TREG_UP	152	141	0.42	1.69	0.0019493	0.052169	https://www.gsea-msigdb.org/gsea/msigdb/human/geneset/GSE14415_NATURAL_TREG_VS_FOXP3_KO_NATURAL_TREG_UP
GSE6259_FLT3L_INDUCED_33D1_POS_DC_VS_CD8_TCELL_DN	150	135	0.43	1.69	0.01145	0.052208	https://www.gsea-msigdb.org/gsea/msigdb/human/geneset/GSE6259_FLT3L_INDUCED_33D1_POS_DC_VS_CD8_TCELL_DN
GSE9960_HEALTHY_VS_GRAM_POS_SEPSIS_PBMC_DN	197	179	0.45	1.69	0.0039139	0.052273	https://www.gsea-msigdb.org/gsea/msigdb/human/geneset/GSE9960_HEALTHY_VS_GRAM_POS_SEPSIS_PBMC_DN
GSE40274_XBP1_VS_FOXP3_AND_XBP1_TRANSDUCED_ACTIVATED_CD4_TCELL_UP	200	185	0.42	1.68	0.0019724	0.052509	https://www.gsea-msigdb.org/gsea/msigdb/human/geneset/GSE40274_XBP1_VS_FOXP3_AND_XBP1_TRANSDUCED_ACTIVATED_CD4_TCELL_UP
GSE24634_TREG_VS_TCONV_POST_DAY7_IL4_CONVERSION_DN	198	192	0.46	1.68	0.023392	0.052607	https://www.gsea-msigdb.org/gsea/msigdb/human/geneset/GSE24634_TREG_VS_TCONV_POST_DAY7_IL4_CONVERSION_DN
GSE26030_TH1_VS_TH17_DAY5_POST_POLARIZATION_DN	197	188	0.42	1.68	0.0098619	0.052708	https://www.gsea-msigdb.org/gsea/msigdb/human/geneset/GSE26030_TH1_VS_TH17_DAY5_POST_POLARIZATION_DN
GSE32986_CURDLAN_LOWDOSE_VS_CURDLAN_HIGHDOSE_STIM_DC_DN	200	191	0.47	1.68	0.0039216	0.052771	https://www.gsea-msigdb.org/gsea/msigdb/human/geneset/GSE32986_CURDLAN_LOWDOSE_VS_CURDLAN_HIGHDOSE_STIM_DC_DN
GSE24634_NAIVE_CD4_TCELL_VS_DAY10_IL4_CONV_TREG_DN	200	196	0.53	1.68	0.026157	0.052808	https://www.gsea-msigdb.org/gsea/msigdb/human/geneset/GSE24634_NAIVE_CD4_TCELL_VS_DAY10_IL4_CONV_TREG_DN
GSE33424_CD161_HIGH_VS_INT_CD8_TCELL_DN	200	189	0.45	1.68	0.0079051	0.052721	https://www.gsea-msigdb.org/gsea/msigdb/human/geneset/GSE33424_CD161_HIGH_VS_INT_CD8_TCELL_DN
GSE7219_UNSTIM_VS_LPS_AND_ANTI_CD40_STIM_DC_DN	174	161	0.41	1.68	0.0037951	0.05264	https://www.gsea-msigdb.org/gsea/msigdb/human/geneset/GSE7219_UNSTIM_VS_LPS_AND_ANTI_CD40_STIM_DC_DN
GSE3337_CTRL_VS_16H_IFNG_IN_CD8POS_DC_UP	200	190	0.41	1.68	0.006012	0.052625	https://www.gsea-msigdb.org/gsea/msigdb/human/geneset/GSE3337_CTRL_VS_16H_IFNG_IN_CD8POS_DC_UP
GSE43955_TH0_VS_TGFB_IL6_TH17_ACT_CD4_TCELL_20H_UP	200	189	0.38	1.68	0	0.052855	https://www.gsea-msigdb.org/gsea/msigdb/human/geneset/GSE43955_TH0_VS_TGFB_IL6_TH17_ACT_CD4_TCELL_20H_UP
GSE41867_NAIVE_VS_DAY30_LCMV_CLONE13_EXHAUSTED_CD8_TCELL_UP	192	179	0.43	1.68	0.01165	0.053186	https://www.gsea-msigdb.org/gsea/msigdb/human/geneset/GSE41867_NAIVE_VS_DAY30_LCMV_CLONE13_EXHAUSTED_CD8_TCELL_UP
GSE46242_TH1_VS_ANERGIC_TH1_CD4_TCELL_WITH_EGR2_DELETED_UP	199	175	0.45	1.68	0.007767	0.053188	https://www.gsea-msigdb.org/gsea/msigdb/human/geneset/GSE46242_TH1_VS_ANERGIC_TH1_CD4_TCELL_WITH_EGR2_DELETED_UP
GSE42021_TCONV_PLN_VS_TREG_PRECURSORS_THYMUS_DN	200	194	0.48	1.68	0.006012	0.053289	https://www.gsea-msigdb.org/gsea/msigdb/human/geneset/GSE42021_TCONV_PLN_VS_TREG_PRECURSORS_THYMUS_DN
GSE22886_TCELL_VS_BCELL_NAIVE_UP	199	189	0.51	1.68	0.021611	0.053193	https://www.gsea-msigdb.org/gsea/msigdb/human/geneset/GSE22886_TCELL_VS_BCELL_NAIVE_UP
GSE8384_CTRL_VS_B_ABORTUS_4H_MAC_CELL_LINE_DN	200	191	0.45	1.68	0.005814	0.053174	https://www.gsea-msigdb.org/gsea/msigdb/human/geneset/GSE8384_CTRL_VS_B_ABORTUS_4H_MAC_CELL_LINE_DN
GSE13522_WT_VS_IFNAR_KO_SKING_T_CRUZI_Y_STRAIN_INF_UP	200	191	0.39	1.68	0.0019881	0.053553	https://www.gsea-msigdb.org/gsea/msigdb/human/geneset/GSE13522_WT_VS_IFNAR_KO_SKING_T_CRUZI_Y_STRAIN_INF_UP
GSE18893_TCONV_VS_TREG_24H_CULTURE_DN	200	188	0.43	1.68	0.0040161	0.053567	https://www.gsea-msigdb.org/gsea/msigdb/human/geneset/GSE18893_TCONV_VS_TREG_24H_CULTURE_DN
GSE23568_CTRL_TRANSDUCED_VS_WT_CD8_TCELL_UP	200	197	0.46	1.68	0.0060484	0.053578	https://www.gsea-msigdb.org/gsea/msigdb/human/geneset/GSE23568_CTRL_TRANSDUCED_VS_WT_CD8_TCELL_UP
GSE31082_CD4_VS_CD8_SP_THYMOCYTE_DN	199	187	0.42	1.68	0.017476	0.053565	https://www.gsea-msigdb.org/gsea/msigdb/human/geneset/GSE31082_CD4_VS_CD8_SP_THYMOCYTE_DN
GSE40274_CTRL_VS_FOXP3_TRANSDUCED_ACTIVATED_CD4_TCELL_DN	200	186	0.45	1.68	0.013725	0.053615	https://www.gsea-msigdb.org/gsea/msigdb/human/geneset/GSE40274_CTRL_VS_FOXP3_TRANSDUCED_ACTIVATED_CD4_TCELL_DN
GSE24972_MARGINAL_ZONE_BCELL_VS_FOLLICULAR_BCELL_IRF8_KO_UP	200	188	0.38	1.68	0	0.054203	https://www.gsea-msigdb.org/gsea/msigdb/human/geneset/GSE24972_MARGINAL_ZONE_BCELL_VS_FOLLICULAR_BCELL_IRF8_KO_UP
GSE43863_TFH_VS_LY6C_LOW_CXCR5NEG_EFFECTOR_CD4_TCELL_DN	199	190	0.43	1.68	0.0074212	0.054313	https://www.gsea-msigdb.org/gsea/msigdb/human/geneset/GSE43863_TFH_VS_LY6C_LOW_CXCR5NEG_EFFECTOR_CD4_TCELL_DN
GSE24142_EARLY_THYMIC_PROGENITOR_VS_DN3_THYMOCYTE_UP	200	192	0.4	1.68	0.011834	0.054283	https://www.gsea-msigdb.org/gsea/msigdb/human/geneset/GSE24142_EARLY_THYMIC_PROGENITOR_VS_DN3_THYMOCYTE_UP
GSE36009_UNSTIM_VS_LPS_STIM_DC_UP	200	172	0.41	1.68	0	0.054241	https://www.gsea-msigdb.org/gsea/msigdb/human/geneset/GSE36009_UNSTIM_VS_LPS_STIM_DC_UP
GSE2706_UNSTIM_VS_2H_R848_DC_DN	194	181	0.5	1.68	0.023392	0.054163	https://www.gsea-msigdb.org/gsea/msigdb/human/geneset/GSE2706_UNSTIM_VS_2H_R848_DC_DN
GSE22229_RENAL_TRANSPLANT_VS_HEALTHY_PBMC_UP	199	189	0.49	1.68	0.018109	0.054468	https://www.gsea-msigdb.org/gsea/msigdb/human/geneset/GSE22229_RENAL_TRANSPLANT_VS_HEALTHY_PBMC_UP
GSE12963_ENV_NEF_VS_ENV_NEF_AND_VPR_DEFICIENT_HIV1_INF_CD4_TCELL_DN	151	141	0.42	1.68	0.015595	0.054453	https://www.gsea-msigdb.org/gsea/msigdb/human/geneset/GSE12963_ENV_NEF_VS_ENV_NEF_AND_VPR_DEFICIENT_HIV1_INF_CD4_TCELL_DN
GSE21380_NON_TFH_VS_TFH_CD4_TCELL_UP	200	190	0.42	1.68	0.030303	0.05469	https://www.gsea-msigdb.org/gsea/msigdb/human/geneset/GSE21380_NON_TFH_VS_TFH_CD4_TCELL_UP
GSE7831_UNSTIM_VS_INFLUENZA_STIM_PDC_1H_UP	200	185	0.44	1.68	0.0038685	0.054612	https://www.gsea-msigdb.org/gsea/msigdb/human/geneset/GSE7831_UNSTIM_VS_INFLUENZA_STIM_PDC_1H_UP
GSE360_T_GONDII_VS_B_MALAYI_HIGH_DOSE_MAC_DN	199	190	0.43	1.68	0.0078125	0.054732	https://www.gsea-msigdb.org/gsea/msigdb/human/geneset/GSE360_T_GONDII_VS_B_MALAYI_HIGH_DOSE_MAC_DN
GSE21033_CTRL_VS_POLYIC_STIM_DC_1H_DN	198	189	0.36	1.68	0	0.055173	https://www.gsea-msigdb.org/gsea/msigdb/human/geneset/GSE21033_CTRL_VS_POLYIC_STIM_DC_1H_DN
GSE14000_UNSTIM_VS_16H_LPS_DC_DN	200	185	0.52	1.67	0.01	0.055288	https://www.gsea-msigdb.org/gsea/msigdb/human/geneset/GSE14000_UNSTIM_VS_16H_LPS_DC_DN
GSE29618_MONOCYTE_VS_PDC_DAY7_FLU_VACCINE_DN	199	189	0.47	1.67	0.010081	0.055284	https://www.gsea-msigdb.org/gsea/msigdb/human/geneset/GSE29618_MONOCYTE_VS_PDC_DAY7_FLU_VACCINE_DN
GSE45365_WT_VS_IFNAR_KO_BCELL_MCMV_INFECTION_DN	196	179	0.44	1.67	0.047151	0.055187	https://www.gsea-msigdb.org/gsea/msigdb/human/geneset/GSE45365_WT_VS_IFNAR_KO_BCELL_MCMV_INFECTION_DN
GSE37301_MULTIPOTENT_PROGENITOR_VS_GRAN_MONO_PROGENITOR_UP	199	188	0.4	1.67	0.0059406	0.055326	https://www.gsea-msigdb.org/gsea/msigdb/human/geneset/GSE37301_MULTIPOTENT_PROGENITOR_VS_GRAN_MONO_PROGENITOR_UP
GSE30971_CTRL_VS_LPS_STIM_MACROPHAGE_WBP7_HET_2H_UP	195	183	0.48	1.67	0.022	0.055304	https://www.gsea-msigdb.org/gsea/msigdb/human/geneset/GSE30971_CTRL_VS_LPS_STIM_MACROPHAGE_WBP7_HET_2H_UP
GSE360_DC_VS_MAC_T_GONDII_UP	198	190	0.38	1.67	0.0018484	0.055317	https://www.gsea-msigdb.org/gsea/msigdb/human/geneset/GSE360_DC_VS_MAC_T_GONDII_UP
GSE3039_ALPHAALPHA_CD8_TCELL_VS_B2_BCELL_DN	200	187	0.46	1.67	0.0039293	0.055746	https://www.gsea-msigdb.org/gsea/msigdb/human/geneset/GSE3039_ALPHAALPHA_CD8_TCELL_VS_B2_BCELL_DN
GSE30971_WBP7_HET_VS_KO_MACROPHAGE_2H_LPS_STIM_DN	198	192	0.47	1.67	0.01006	0.055718	https://www.gsea-msigdb.org/gsea/msigdb/human/geneset/GSE30971_WBP7_HET_VS_KO_MACROPHAGE_2H_LPS_STIM_DN
GSE17721_CTRL_VS_PAM3CSK4_6H_BMDC_DN	200	184	0.46	1.67	0.008016	0.055798	https://www.gsea-msigdb.org/gsea/msigdb/human/geneset/GSE17721_CTRL_VS_PAM3CSK4_6H_BMDC_DN
GSE18791_CTRL_VS_NEWCASTLE_VIRUS_DC_18H_DN	193	183	0.4	1.67	0.0038835	0.055925	https://www.gsea-msigdb.org/gsea/msigdb/human/geneset/GSE18791_CTRL_VS_NEWCASTLE_VIRUS_DC_18H_DN
GSE9650_EFFECTOR_VS_MEMORY_CD8_TCELL_UP	199	185	0.5	1.67	0.026157	0.055867	https://www.gsea-msigdb.org/gsea/msigdb/human/geneset/GSE9650_EFFECTOR_VS_MEMORY_CD8_TCELL_UP
GSE3337_CTRL_VS_16H_IFNG_IN_CD8POS_DC_DN	200	187	0.52	1.67	0.02004	0.055996	https://www.gsea-msigdb.org/gsea/msigdb/human/geneset/GSE3337_CTRL_VS_16H_IFNG_IN_CD8POS_DC_DN
GSE4590_LARGE_PRE_BCELL_VS_VPREB_POS_LARGE_PRE_BCELL_DN	180	177	0.42	1.67	0.0020325	0.055915	https://www.gsea-msigdb.org/gsea/msigdb/human/geneset/GSE4590_LARGE_PRE_BCELL_VS_VPREB_POS_LARGE_PRE_BCELL_DN
GSE17721_CTRL_VS_POLYIC_24H_BMDC_DN	200	187	0.4	1.67	0.001996	0.055831	https://www.gsea-msigdb.org/gsea/msigdb/human/geneset/GSE17721_CTRL_VS_POLYIC_24H_BMDC_DN
GSE4590_SMALL_VS_LARGE_PRE_BCELL_UP	175	167	0.42	1.67	0.0097656	0.05591	https://www.gsea-msigdb.org/gsea/msigdb/human/geneset/GSE4590_SMALL_VS_LARGE_PRE_BCELL_UP
GSE32986_UNSTIM_VS_CURDLAN_LOWDOSE_STIM_DC_DN	200	187	0.5	1.67	0.014085	0.056378	https://www.gsea-msigdb.org/gsea/msigdb/human/geneset/GSE32986_UNSTIM_VS_CURDLAN_LOWDOSE_STIM_DC_DN
GSE360_L_MAJOR_VS_B_MALAYI_HIGH_DOSE_DC_UP	200	193	0.42	1.67	0.0038314	0.056328	https://www.gsea-msigdb.org/gsea/msigdb/human/geneset/GSE360_L_MAJOR_VS_B_MALAYI_HIGH_DOSE_DC_UP
GSE17974_CTRL_VS_ACT_IL4_AND_ANTI_IL12_4H_CD4_TCELL_DN	199	188	0.52	1.67	0.027778	0.056236	https://www.gsea-msigdb.org/gsea/msigdb/human/geneset/GSE17974_CTRL_VS_ACT_IL4_AND_ANTI_IL12_4H_CD4_TCELL_DN
GSE45365_NK_CELL_VS_BCELL_MCMV_INFECTION_DN	199	185	0.44	1.67	0.011605	0.056412	https://www.gsea-msigdb.org/gsea/msigdb/human/geneset/GSE45365_NK_CELL_VS_BCELL_MCMV_INFECTION_DN
GSE26343_UNSTIM_VS_LPS_STIM_NFAT5_KO_MACROPHAGE_DN	200	195	0.5	1.67	0.011696	0.056608	https://www.gsea-msigdb.org/gsea/msigdb/human/geneset/GSE26343_UNSTIM_VS_LPS_STIM_NFAT5_KO_MACROPHAGE_DN
GSE26343_WT_VS_NFAT5_KO_MACROPHAGE_DN	200	189	0.46	1.67	0.0058027	0.05684	https://www.gsea-msigdb.org/gsea/msigdb/human/geneset/GSE26343_WT_VS_NFAT5_KO_MACROPHAGE_DN
GSE1432_1H_VS_6H_IFNG_MICROGLIA_DN	200	186	0.53	1.67	0.02947	0.056917	https://www.gsea-msigdb.org/gsea/msigdb/human/geneset/GSE1432_1H_VS_6H_IFNG_MICROGLIA_DN
GSE411_WT_VS_SOCS3_KO_MACROPHAGE_IL6_STIM_100MIN_UP	200	194	0.46	1.67	0.018036	0.056933	https://www.gsea-msigdb.org/gsea/msigdb/human/geneset/GSE411_WT_VS_SOCS3_KO_MACROPHAGE_IL6_STIM_100MIN_UP
GSE339_CD8POS_VS_CD4CD8DN_DC_IN_CULTURE_UP	200	191	0.44	1.67	0.0019342	0.05704	https://www.gsea-msigdb.org/gsea/msigdb/human/geneset/GSE339_CD8POS_VS_CD4CD8DN_DC_IN_CULTURE_UP
GSE14415_INDUCED_TREG_VS_FOXP3_KO_INDUCED_TREG_IL2_CULTURE_UP	174	165	0.48	1.67	0.01004	0.056968	https://www.gsea-msigdb.org/gsea/msigdb/human/geneset/GSE14415_INDUCED_TREG_VS_FOXP3_KO_INDUCED_TREG_IL2_CULTURE_UP
GSE17721_LPS_VS_GARDIQUIMOD_16H_BMDC_UP	199	192	0.43	1.67	0.0075614	0.056915	https://www.gsea-msigdb.org/gsea/msigdb/human/geneset/GSE17721_LPS_VS_GARDIQUIMOD_16H_BMDC_UP
GSE3982_MAST_CELL_VS_TH1_DN	198	187	0.47	1.67	0.024145	0.056857	https://www.gsea-msigdb.org/gsea/msigdb/human/geneset/GSE3982_MAST_CELL_VS_TH1_DN
GSE42021_CD24HI_VS_CD24LOW_TREG_THYMUS_DN	200	191	0.44	1.67	0.021869	0.056768	https://www.gsea-msigdb.org/gsea/msigdb/human/geneset/GSE42021_CD24HI_VS_CD24LOW_TREG_THYMUS_DN
GSE29615_CTRL_VS_LAIV_FLU_VACCINE_PBMC_UP	191	182	0.38	1.67	0.006012	0.057031	https://www.gsea-msigdb.org/gsea/msigdb/human/geneset/GSE29615_CTRL_VS_LAIV_FLU_VACCINE_PBMC_UP
GSE17974_IL4_AND_ANTI_IL12_VS_UNTREATED_12H_ACT_CD4_TCELL_DN	191	185	0.39	1.67	0	0.057353	https://www.gsea-msigdb.org/gsea/msigdb/human/geneset/GSE17974_IL4_AND_ANTI_IL12_VS_UNTREATED_12H_ACT_CD4_TCELL_DN
GSE9650_NAIVE_VS_MEMORY_CD8_TCELL_DN	200	189	0.44	1.67	0.015414	0.057535	https://www.gsea-msigdb.org/gsea/msigdb/human/geneset/GSE9650_NAIVE_VS_MEMORY_CD8_TCELL_DN
GSE22025_PROGESTERONE_VS_TGFB1_AND_PROGESTERONE_TREATED_CD4_TCELL_DN	198	190	0.39	1.67	0	0.057719	https://www.gsea-msigdb.org/gsea/msigdb/human/geneset/GSE22025_PROGESTERONE_VS_TGFB1_AND_PROGESTERONE_TREATED_CD4_TCELL_DN
GSE22140_GERMFREE_VS_SPF_ARTHRITIC_MOUSE_CD4_TCELL_UP	200	195	0.47	1.67	0.0020325	0.057807	https://www.gsea-msigdb.org/gsea/msigdb/human/geneset/GSE22140_GERMFREE_VS_SPF_ARTHRITIC_MOUSE_CD4_TCELL_UP
GSE43863_DAY6_EFF_VS_DAY150_MEM_TFH_CD4_TCELL_UP	199	188	0.42	1.67	0.0019685	0.057768	https://www.gsea-msigdb.org/gsea/msigdb/human/geneset/GSE43863_DAY6_EFF_VS_DAY150_MEM_TFH_CD4_TCELL_UP
GSE22611_UNSTIM_VS_2H_MDP_STIM_NOD2_TRANSDUCED_HEK293T_CELL_UP	195	184	0.37	1.67	0	0.057681	https://www.gsea-msigdb.org/gsea/msigdb/human/geneset/GSE22611_UNSTIM_VS_2H_MDP_STIM_NOD2_TRANSDUCED_HEK293T_CELL_UP
GSE31082_DP_VS_CD4_SP_THYMOCYTE_DN	199	187	0.43	1.67	0.0040816	0.057589	https://www.gsea-msigdb.org/gsea/msigdb/human/geneset/GSE31082_DP_VS_CD4_SP_THYMOCYTE_DN
GSE7460_CD8_TCELL_VS_CD4_TCELL_ACT_UP	199	178	0.39	1.67	0.003937	0.05764	https://www.gsea-msigdb.org/gsea/msigdb/human/geneset/GSE7460_CD8_TCELL_VS_CD4_TCELL_ACT_UP
GSE43957_UNTREATED_VS_NACL_TREATED_ANTI_CD3_CD28_STIM_CD4_TCELL_UP	200	188	0.35	1.67	0	0.057548	https://www.gsea-msigdb.org/gsea/msigdb/human/geneset/GSE43957_UNTREATED_VS_NACL_TREATED_ANTI_CD3_CD28_STIM_CD4_TCELL_UP
GSE1925_CTRL_VS_IFNG_PRIMED_MACROPHAGE_24H_IFNG_STIM_UP	200	186	0.38	1.66	0.0039761	0.057767	https://www.gsea-msigdb.org/gsea/msigdb/human/geneset/GSE1925_CTRL_VS_IFNG_PRIMED_MACROPHAGE_24H_IFNG_STIM_UP
GSE22886_NAIVE_BCELL_VS_BLOOD_PLASMA_CELL_DN	198	189	0.57	1.66	0.042169	0.057993	https://www.gsea-msigdb.org/gsea/msigdb/human/geneset/GSE22886_NAIVE_BCELL_VS_BLOOD_PLASMA_CELL_DN
GSE9988_LOW_LPS_VS_VEHICLE_TREATED_MONOCYTE_UP	196	183	0.54	1.66	0.031683	0.057959	https://www.gsea-msigdb.org/gsea/msigdb/human/geneset/GSE9988_LOW_LPS_VS_VEHICLE_TREATED_MONOCYTE_UP
GSE4984_UNTREATED_VS_GALECTIN1_TREATED_DC_UP	191	180	0.44	1.66	0.023211	0.058037	https://www.gsea-msigdb.org/gsea/msigdb/human/geneset/GSE4984_UNTREATED_VS_GALECTIN1_TREATED_DC_UP
GSE39556_UNTREATED_VS_3H_POLYIC_INJ_MOUSE_CD8A_DC_UP	199	193	0.43	1.66	0.02549	0.057951	https://www.gsea-msigdb.org/gsea/msigdb/human/geneset/GSE39556_UNTREATED_VS_3H_POLYIC_INJ_MOUSE_CD8A_DC_UP
GSE7768_OVA_ALONE_VS_OVA_WITH_MPL_IMMUNIZED_MOUSE_WHOLE_SPLEEN_6H_DN	164	156	0.45	1.66	0	0.058006	https://www.gsea-msigdb.org/gsea/msigdb/human/geneset/GSE7768_OVA_ALONE_VS_OVA_WITH_MPL_IMMUNIZED_MOUSE_WHOLE_SPLEEN_6H_DN
GSE11961_MEMORY_BCELL_DAY7_VS_GERMINAL_CENTER_BCELL_DAY40_UP	200	183	0.38	1.66	0.0060484	0.057976	https://www.gsea-msigdb.org/gsea/msigdb/human/geneset/GSE11961_MEMORY_BCELL_DAY7_VS_GERMINAL_CENTER_BCELL_DAY40_UP
GSE1925_CTRL_VS_3H_IFNG_STIM_MACROPHAGE_DN	199	193	0.34	1.66	0	0.058064	https://www.gsea-msigdb.org/gsea/msigdb/human/geneset/GSE1925_CTRL_VS_3H_IFNG_STIM_MACROPHAGE_DN
GSE36527_CD62L_HIGH_CD69_NEG_VS_CD62L_LOW_CD69_POS_TREG_KLRG1_NEG_DN	200	190	0.39	1.66	0	0.058229	https://www.gsea-msigdb.org/gsea/msigdb/human/geneset/GSE36527_CD62L_HIGH_CD69_NEG_VS_CD62L_LOW_CD69_POS_TREG_KLRG1_NEG_DN
GSE3565_CTRL_VS_LPS_INJECTED_SPLENOCYTES_UP	178	169	0.41	1.66	0.024762	0.058232	https://www.gsea-msigdb.org/gsea/msigdb/human/geneset/GSE3565_CTRL_VS_LPS_INJECTED_SPLENOCYTES_UP
GSE360_L_MAJOR_VS_M_TUBERCULOSIS_DC_DN	199	189	0.4	1.66	0	0.058484	https://www.gsea-msigdb.org/gsea/msigdb/human/geneset/GSE360_L_MAJOR_VS_M_TUBERCULOSIS_DC_DN
GSE10325_CD4_TCELL_VS_BCELL_DN	195	183	0.49	1.66	0.064579	0.058577	https://www.gsea-msigdb.org/gsea/msigdb/human/geneset/GSE10325_CD4_TCELL_VS_BCELL_DN
GSE26488_WT_VS_HDAC7_DELTAP_TG_OT2_THYMOCYTE_WITH_PEPTIDE_INJECTION_UP	200	189	0.36	1.66	0	0.058647	https://www.gsea-msigdb.org/gsea/msigdb/human/geneset/GSE26488_WT_VS_HDAC7_DELTAP_TG_OT2_THYMOCYTE_WITH_PEPTIDE_INJECTION_UP
GSE39152_BRAIN_VS_SPLEEN_CD103_NEG_MEMORY_CD8_TCELL_DN	200	190	0.46	1.66	0.017442	0.058616	https://www.gsea-msigdb.org/gsea/msigdb/human/geneset/GSE39152_BRAIN_VS_SPLEEN_CD103_NEG_MEMORY_CD8_TCELL_DN
GSE43955_TH0_VS_TGFB_IL6_IL23_TH17_ACT_CD4_TCELL_52H_UP	200	192	0.42	1.66	0	0.058552	https://www.gsea-msigdb.org/gsea/msigdb/human/geneset/GSE43955_TH0_VS_TGFB_IL6_IL23_TH17_ACT_CD4_TCELL_52H_UP
GSE26669_CTRL_VS_COSTIM_BLOCK_MLR_CD4_TCELL_UP	200	188	0.49	1.66	0.041257	0.058529	https://www.gsea-msigdb.org/gsea/msigdb/human/geneset/GSE26669_CTRL_VS_COSTIM_BLOCK_MLR_CD4_TCELL_UP
GSE13306_RA_VS_UNTREATED_MEM_CD4_TCELL_DN	200	181	0.41	1.66	0.0019417	0.058476	https://www.gsea-msigdb.org/gsea/msigdb/human/geneset/GSE13306_RA_VS_UNTREATED_MEM_CD4_TCELL_DN
GSE20715_0H_VS_48H_OZONE_LUNG_UP	200	184	0.42	1.66	0.017647	0.058595	https://www.gsea-msigdb.org/gsea/msigdb/human/geneset/GSE20715_0H_VS_48H_OZONE_LUNG_UP
GSE23568_ID3_KO_VS_WT_CD8_TCELL_DN	200	195	0.46	1.66	0.017751	0.058868	https://www.gsea-msigdb.org/gsea/msigdb/human/geneset/GSE23568_ID3_KO_VS_WT_CD8_TCELL_DN
GSE5455_EX_VIVO_VS_POST_24H_INCUBATION_MONOCYTES_FROM_TUMOR_BEARING_MOUSE_DN	200	183	0.39	1.66	0	0.058785	https://www.gsea-msigdb.org/gsea/msigdb/human/geneset/GSE5455_EX_VIVO_VS_POST_24H_INCUBATION_MONOCYTES_FROM_TUMOR_BEARING_MOUSE_DN
GSE21546_WT_VS_SAP1A_KO_AND_ELK1_KO_DP_THYMOCYTES_UP	200	187	0.4	1.66	0.0019763	0.058827	https://www.gsea-msigdb.org/gsea/msigdb/human/geneset/GSE21546_WT_VS_SAP1A_KO_AND_ELK1_KO_DP_THYMOCYTES_UP
GSE41176_WT_VS_TAK1_KO_UNSTIM_BCELL_UP	198	191	0.4	1.66	0	0.058739	https://www.gsea-msigdb.org/gsea/msigdb/human/geneset/GSE41176_WT_VS_TAK1_KO_UNSTIM_BCELL_UP
GSE17974_CTRL_VS_ACT_IL4_AND_ANTI_IL12_6H_CD4_TCELL_DN	197	188	0.45	1.66	0.01004	0.058649	https://www.gsea-msigdb.org/gsea/msigdb/human/geneset/GSE17974_CTRL_VS_ACT_IL4_AND_ANTI_IL12_6H_CD4_TCELL_DN
GSE19198_1H_VS_24H_IL21_TREATED_TCELL_UP	200	186	0.4	1.66	0.020913	0.0586	https://www.gsea-msigdb.org/gsea/msigdb/human/geneset/GSE19198_1H_VS_24H_IL21_TREATED_TCELL_UP
GSE33374_CD8_ALPHAALPHA_VS_ALPHABETA_CD161_HIGH_TCELL_DN	200	192	0.46	1.66	0.023166	0.058816	https://www.gsea-msigdb.org/gsea/msigdb/human/geneset/GSE33374_CD8_ALPHAALPHA_VS_ALPHABETA_CD161_HIGH_TCELL_DN
GSE21670_UNTREATED_VS_TGFB_TREATED_STAT3_KO_CD4_TCELL_DN	199	186	0.43	1.66	0.0062241	0.058866	https://www.gsea-msigdb.org/gsea/msigdb/human/geneset/GSE21670_UNTREATED_VS_TGFB_TREATED_STAT3_KO_CD4_TCELL_DN
GSE24634_NAIVE_CD4_TCELL_VS_DAY7_IL4_CONV_TREG_DN	200	187	0.6	1.66	0.047525	0.058805	https://www.gsea-msigdb.org/gsea/msigdb/human/geneset/GSE24634_NAIVE_CD4_TCELL_VS_DAY7_IL4_CONV_TREG_DN
GSE5589_LPS_VS_LPS_AND_IL10_STIM_MACROPHAGE_45MIN_UP	200	184	0.4	1.66	0.0019763	0.058842	https://www.gsea-msigdb.org/gsea/msigdb/human/geneset/GSE5589_LPS_VS_LPS_AND_IL10_STIM_MACROPHAGE_45MIN_UP
GSE22601_DOUBLE_NEGATIVE_VS_CD4_SINGLE_POSITIVE_THYMOCYTE_DN	200	188	0.45	1.66	0.0099206	0.058776	https://www.gsea-msigdb.org/gsea/msigdb/human/geneset/GSE22601_DOUBLE_NEGATIVE_VS_CD4_SINGLE_POSITIVE_THYMOCYTE_DN
GSE17721_CTRL_VS_CPG_0.5H_BMDC_DN	200	186	0.36	1.66	0.0019048	0.059412	https://www.gsea-msigdb.org/gsea/msigdb/human/geneset/GSE17721_CTRL_VS_CPG_0.5H_BMDC_DN
GSE4590_SMALL_VS_VPREB_POS_LARGE_PRE_BCELL_DN	160	147	0.39	1.66	0.0019048	0.059431	https://www.gsea-msigdb.org/gsea/msigdb/human/geneset/GSE4590_SMALL_VS_VPREB_POS_LARGE_PRE_BCELL_DN
GSE40274_HELIOS_VS_FOXP3_AND_HELIOS_TRANSDUCED_ACTIVATED_CD4_TCELL_UP	200	187	0.38	1.66	0.0019084	0.059368	https://www.gsea-msigdb.org/gsea/msigdb/human/geneset/GSE40274_HELIOS_VS_FOXP3_AND_HELIOS_TRANSDUCED_ACTIVATED_CD4_TCELL_UP
GSE37301_LYMPHOID_PRIMED_MPP_VS_COMMON_LYMPHOID_PROGENITOR_DN	200	196	0.44	1.66	0.0040323	0.05961	https://www.gsea-msigdb.org/gsea/msigdb/human/geneset/GSE37301_LYMPHOID_PRIMED_MPP_VS_COMMON_LYMPHOID_PROGENITOR_DN
GSE3982_DC_VS_NEUTROPHIL_LPS_STIM_DN	194	189	0.39	1.66	0.0037879	0.059586	https://www.gsea-msigdb.org/gsea/msigdb/human/geneset/GSE3982_DC_VS_NEUTROPHIL_LPS_STIM_DN
GSE11961_FOLLICULAR_BCELL_VS_MARGINAL_ZONE_BCELL_DN	200	183	0.34	1.66	0	0.059761	https://www.gsea-msigdb.org/gsea/msigdb/human/geneset/GSE11961_FOLLICULAR_BCELL_VS_MARGINAL_ZONE_BCELL_DN
GSE27670_BLIMP1_VS_LMP1_TRANSDUCED_GC_BCELL_UP	200	189	0.44	1.66	0.015474	0.059758	https://www.gsea-msigdb.org/gsea/msigdb/human/geneset/GSE27670_BLIMP1_VS_LMP1_TRANSDUCED_GC_BCELL_UP
GSE9988_LOW_LPS_VS_ANTI_TREM1_AND_LPS_MONOCYTE_UP	196	184	0.47	1.66	0.023166	0.059713	https://www.gsea-msigdb.org/gsea/msigdb/human/geneset/GSE9988_LOW_LPS_VS_ANTI_TREM1_AND_LPS_MONOCYTE_UP
GSE18281_MEDULLARY_THYMOCYTE_VS_WHOLE_MEDULLA_THYMUS_DN	198	183	0.42	1.66	0.011696	0.059655	https://www.gsea-msigdb.org/gsea/msigdb/human/geneset/GSE18281_MEDULLARY_THYMOCYTE_VS_WHOLE_MEDULLA_THYMUS_DN
GSE9006_1MONTH_VS_4MONTH_POST_TYPE_1_DIABETES_DX_PBMC_UP	198	191	0.41	1.66	0.0057803	0.059607	https://www.gsea-msigdb.org/gsea/msigdb/human/geneset/GSE9006_1MONTH_VS_4MONTH_POST_TYPE_1_DIABETES_DX_PBMC_UP
GSE39556_CD8A_DC_VS_NK_CELL_DN	198	190	0.41	1.66	0.024857	0.059521	https://www.gsea-msigdb.org/gsea/msigdb/human/geneset/GSE39556_CD8A_DC_VS_NK_CELL_DN
GSE3982_NEUTROPHIL_VS_EFF_MEMORY_CD4_TCELL_UP	199	191	0.46	1.66	0.01992	0.059503	https://www.gsea-msigdb.org/gsea/msigdb/human/geneset/GSE3982_NEUTROPHIL_VS_EFF_MEMORY_CD4_TCELL_UP
GSE29615_CTRL_VS_DAY7_LAIV_FLU_VACCINE_PBMC_UP	194	177	0.39	1.66	0	0.059411	https://www.gsea-msigdb.org/gsea/msigdb/human/geneset/GSE29615_CTRL_VS_DAY7_LAIV_FLU_VACCINE_PBMC_UP
GSE11864_UNTREATED_VS_CSF1_IFNG_PAM3CYS_IN_MAC_DN	199	186	0.44	1.66	0.0080483	0.059446	https://www.gsea-msigdb.org/gsea/msigdb/human/geneset/GSE11864_UNTREATED_VS_CSF1_IFNG_PAM3CYS_IN_MAC_DN
GSE24726_WT_VS_E2_22_KO_PDC_DAY4_POST_DELETION_DN	200	187	0.47	1.66	0.026923	0.059467	https://www.gsea-msigdb.org/gsea/msigdb/human/geneset/GSE24726_WT_VS_E2_22_KO_PDC_DAY4_POST_DELETION_DN
KAECH_NAIVE_VS_MEMORY_CD8_TCELL_DN	200	191	0.45	1.66	0.017308	0.059378	https://www.gsea-msigdb.org/gsea/msigdb/human/geneset/KAECH_NAIVE_VS_MEMORY_CD8_TCELL_DN
GSE1112_HY_CD8AB_VS_HY_CD8AA_THYMOCYTE_RTOC_CULTURE_DN	193	181	0.38	1.65	0.0059761	0.059998	https://www.gsea-msigdb.org/gsea/msigdb/human/geneset/GSE1112_HY_CD8AB_VS_HY_CD8AA_THYMOCYTE_RTOC_CULTURE_DN
GSE32423_CTRL_VS_IL4_MEMORY_CD8_TCELL_DN	200	183	0.39	1.65	0.0075472	0.060021	https://www.gsea-msigdb.org/gsea/msigdb/human/geneset/GSE32423_CTRL_VS_IL4_MEMORY_CD8_TCELL_DN
GSE3982_EOSINOPHIL_VS_DC_UP	199	188	0.37	1.65	0.0019569	0.059958	https://www.gsea-msigdb.org/gsea/msigdb/human/geneset/GSE3982_EOSINOPHIL_VS_DC_UP
GSE4984_GALECTIN1_VS_LPS_STIM_DC_DN	169	157	0.44	1.65	0.0019802	0.060043	https://www.gsea-msigdb.org/gsea/msigdb/human/geneset/GSE4984_GALECTIN1_VS_LPS_STIM_DC_DN
GSE37532_TREG_VS_TCONV_CD4_TCELL_FROM_LN_DN	200	184	0.46	1.65	0.011516	0.060143	https://www.gsea-msigdb.org/gsea/msigdb/human/geneset/GSE37532_TREG_VS_TCONV_CD4_TCELL_FROM_LN_DN
GSE45382_UNTREATED_VS_TGFB_TREATED_MACROPHAGES_UP	198	188	0.46	1.65	0.021073	0.060189	https://www.gsea-msigdb.org/gsea/msigdb/human/geneset/GSE45382_UNTREATED_VS_TGFB_TREATED_MACROPHAGES_UP
GSE21360_NAIVE_VS_QUATERNARY_MEMORY_CD8_TCELL_DN	200	185	0.55	1.65	0.02004	0.060175	https://www.gsea-msigdb.org/gsea/msigdb/human/geneset/GSE21360_NAIVE_VS_QUATERNARY_MEMORY_CD8_TCELL_DN
GSE22886_NAIVE_CD8_TCELL_VS_DC_DN	200	193	0.46	1.65	0.01378	0.060381	https://www.gsea-msigdb.org/gsea/msigdb/human/geneset/GSE22886_NAIVE_CD8_TCELL_VS_DC_DN
GSE339_CD4POS_VS_CD8POS_DC_IN_CULTURE_DN	200	185	0.43	1.65	0.0076775	0.060462	https://www.gsea-msigdb.org/gsea/msigdb/human/geneset/GSE339_CD4POS_VS_CD8POS_DC_IN_CULTURE_DN
GSE29618_BCELL_VS_PDC_UP	196	189	0.46	1.65	0.03373	0.060394	https://www.gsea-msigdb.org/gsea/msigdb/human/geneset/GSE29618_BCELL_VS_PDC_UP
GSE5679_CTRL_VS_PPARG_LIGAND_ROSIGLITAZONE_AND_RARA_AGONIST_AM580_TREATED_DC_DN	200	186	0.41	1.65	0.013487	0.060357	https://www.gsea-msigdb.org/gsea/msigdb/human/geneset/GSE5679_CTRL_VS_PPARG_LIGAND_ROSIGLITAZONE_AND_RARA_AGONIST_AM580_TREATED_DC_DN
GSE25085_FETAL_BM_VS_ADULT_BM_SP4_THYMIC_IMPLANT_UP	200	186	0.49	1.65	0.0098619	0.060328	https://www.gsea-msigdb.org/gsea/msigdb/human/geneset/GSE25085_FETAL_BM_VS_ADULT_BM_SP4_THYMIC_IMPLANT_UP
GSE14699_NAIVE_VS_DELETIONAL_TOLERANCE_CD8_TCELL_DN	200	185	0.36	1.65	0.0019802	0.060375	https://www.gsea-msigdb.org/gsea/msigdb/human/geneset/GSE14699_NAIVE_VS_DELETIONAL_TOLERANCE_CD8_TCELL_DN
GSE5589_LPS_VS_LPS_AND_IL10_STIM_IL6_KO_MACROPHAGE_45MIN_DN	200	191	0.44	1.65	0.019608	0.06043	https://www.gsea-msigdb.org/gsea/msigdb/human/geneset/GSE5589_LPS_VS_LPS_AND_IL10_STIM_IL6_KO_MACROPHAGE_45MIN_DN
GSE13762_CTRL_VS_125_VITAMIND_DAY12_DC_UP	148	139	0.36	1.65	0	0.060355	https://www.gsea-msigdb.org/gsea/msigdb/human/geneset/GSE13762_CTRL_VS_125_VITAMIND_DAY12_DC_UP
GSE16522_MEMORY_VS_NAIVE_ANTI_CD3CD28_STIM_CD8_TCELL_DN	200	188	0.42	1.65	0.0059055	0.060323	https://www.gsea-msigdb.org/gsea/msigdb/human/geneset/GSE16522_MEMORY_VS_NAIVE_ANTI_CD3CD28_STIM_CD8_TCELL_DN
GSE32986_CURDLAN_LOWDOSE_VS_GMCSF_AND_CURDLAN_LOWDOSE_STIM_DC_DN	198	185	0.5	1.65	0.018	0.060503	https://www.gsea-msigdb.org/gsea/msigdb/human/geneset/GSE32986_CURDLAN_LOWDOSE_VS_GMCSF_AND_CURDLAN_LOWDOSE_STIM_DC_DN
GSE339_EX_VIVO_VS_IN_CULTURE_CD8POS_DC_DN	200	194	0.42	1.65	0.015414	0.060935	https://www.gsea-msigdb.org/gsea/msigdb/human/geneset/GSE339_EX_VIVO_VS_IN_CULTURE_CD8POS_DC_DN
GSE11864_CSF1_PAM3CYS_VS_CSF1_IFNG_PAM3CYS_IN_MAC_DN	193	184	0.43	1.65	0.0098232	0.061047	https://www.gsea-msigdb.org/gsea/msigdb/human/geneset/GSE11864_CSF1_PAM3CYS_VS_CSF1_IFNG_PAM3CYS_IN_MAC_DN
GSE26928_EFF_MEM_VS_CENTR_MEM_CD4_TCELL_UP	190	182	0.35	1.65	0.0018797	0.060972	https://www.gsea-msigdb.org/gsea/msigdb/human/geneset/GSE26928_EFF_MEM_VS_CENTR_MEM_CD4_TCELL_UP
GSE36476_CTRL_VS_TSST_ACT_16H_MEMORY_CD4_TCELL_OLD_DN	200	189	0.55	1.65	0.051081	0.061162	https://www.gsea-msigdb.org/gsea/msigdb/human/geneset/GSE36476_CTRL_VS_TSST_ACT_16H_MEMORY_CD4_TCELL_OLD_DN
GSE22886_NEUTROPHIL_VS_DC_UP	199	183	0.4	1.65	0.0019493	0.06118	https://www.gsea-msigdb.org/gsea/msigdb/human/geneset/GSE22886_NEUTROPHIL_VS_DC_UP
GSE18893_TCONV_VS_TREG_2H_CULTURE_DN	200	190	0.45	1.65	0.012072	0.0612	https://www.gsea-msigdb.org/gsea/msigdb/human/geneset/GSE18893_TCONV_VS_TREG_2H_CULTURE_DN
GSE3565_DUSP1_VS_WT_SPLENOCYTES_POST_LPS_INJECTION_DN	158	147	0.36	1.65	0	0.061399	https://www.gsea-msigdb.org/gsea/msigdb/human/geneset/GSE3565_DUSP1_VS_WT_SPLENOCYTES_POST_LPS_INJECTION_DN
GSE2826_XID_VS_BTK_KO_BCELL_DN	200	191	0.4	1.65	0.0038685	0.061444	https://www.gsea-msigdb.org/gsea/msigdb/human/geneset/GSE2826_XID_VS_BTK_KO_BCELL_DN
GSE15735_CTRL_VS_HDAC_INHIBITOR_TREATED_CD4_TCELL_2H_UP	199	186	0.42	1.65	0.019531	0.061557	https://www.gsea-msigdb.org/gsea/msigdb/human/geneset/GSE15735_CTRL_VS_HDAC_INHIBITOR_TREATED_CD4_TCELL_2H_UP
GSE3982_MAST_CELL_VS_BCELL_DN	197	179	0.44	1.65	0.018904	0.061619	https://www.gsea-msigdb.org/gsea/msigdb/human/geneset/GSE3982_MAST_CELL_VS_BCELL_DN
GSE25087_TREG_VS_TCONV_FETUS_UP	198	188	0.44	1.65	0.002	0.061528	https://www.gsea-msigdb.org/gsea/msigdb/human/geneset/GSE25087_TREG_VS_TCONV_FETUS_UP
GSE17721_PAM3CSK4_VS_GADIQUIMOD_0.5H_BMDC_UP	200	192	0.37	1.65	0	0.061446	https://www.gsea-msigdb.org/gsea/msigdb/human/geneset/GSE17721_PAM3CSK4_VS_GADIQUIMOD_0.5H_BMDC_UP
GSE9988_LPS_VS_VEHICLE_TREATED_MONOCYTE_UP	197	182	0.55	1.65	0.034137	0.062338	https://www.gsea-msigdb.org/gsea/msigdb/human/geneset/GSE9988_LPS_VS_VEHICLE_TREATED_MONOCYTE_UP
GSE45365_HEALTHY_VS_MCMV_INFECTION_CD8A_DC_IFNAR_KO_DN	199	194	0.47	1.65	0.0099602	0.062289	https://www.gsea-msigdb.org/gsea/msigdb/human/geneset/GSE45365_HEALTHY_VS_MCMV_INFECTION_CD8A_DC_IFNAR_KO_DN
GSE21380_TFH_VS_GERMINAL_CENTER_TFH_CD4_TCELL_UP	200	191	0.39	1.65	0.016981	0.062462	https://www.gsea-msigdb.org/gsea/msigdb/human/geneset/GSE21380_TFH_VS_GERMINAL_CENTER_TFH_CD4_TCELL_UP
GSE36078_UNTREATED_VS_AD5_INF_MOUSE_LUNG_DC_DN	200	183	0.4	1.65	0.0040161	0.06243	https://www.gsea-msigdb.org/gsea/msigdb/human/geneset/GSE36078_UNTREATED_VS_AD5_INF_MOUSE_LUNG_DC_DN
GSE22443_NAIVE_VS_ACT_AND_IL2_TREATED_CD8_TCELL_DN	200	192	0.34	1.65	0.0018868	0.062406	https://www.gsea-msigdb.org/gsea/msigdb/human/geneset/GSE22443_NAIVE_VS_ACT_AND_IL2_TREATED_CD8_TCELL_DN
GSE13738_RESTING_VS_BYSTANDER_ACTIVATED_CD4_TCELL_DN	198	187	0.48	1.65	0.020121	0.062373	https://www.gsea-msigdb.org/gsea/msigdb/human/geneset/GSE13738_RESTING_VS_BYSTANDER_ACTIVATED_CD4_TCELL_DN
GSE6259_33D1_POS_VS_DEC205_POS_FLT3L_INDUCED_SPLENIC_DC_UP	175	163	0.4	1.65	0.0018416	0.062304	https://www.gsea-msigdb.org/gsea/msigdb/human/geneset/GSE6259_33D1_POS_VS_DEC205_POS_FLT3L_INDUCED_SPLENIC_DC_UP
GSE36476_CTRL_VS_TSST_ACT_16H_MEMORY_CD4_TCELL_YOUNG_DN	200	194	0.51	1.65	0.035928	0.062222	https://www.gsea-msigdb.org/gsea/msigdb/human/geneset/GSE36476_CTRL_VS_TSST_ACT_16H_MEMORY_CD4_TCELL_YOUNG_DN
GSE32986_CURDLAN_HIGHDOSE_VS_GMCSF_AND_CURDLAN_HIGHDOSE_STIM_DC_DN	200	194	0.46	1.64	0.024209	0.062723	https://www.gsea-msigdb.org/gsea/msigdb/human/geneset/GSE32986_CURDLAN_HIGHDOSE_VS_GMCSF_AND_CURDLAN_HIGHDOSE_STIM_DC_DN
GSE18791_CTRL_VS_NEWCASTLE_VIRUS_DC_14H_DN	192	178	0.42	1.64	0.012939	0.062839	https://www.gsea-msigdb.org/gsea/msigdb/human/geneset/GSE18791_CTRL_VS_NEWCASTLE_VIRUS_DC_14H_DN
GSE19512_NAUTRAL_VS_INDUCED_TREG_DN	200	189	0.38	1.64	0.0019493	0.062753	https://www.gsea-msigdb.org/gsea/msigdb/human/geneset/GSE19512_NAUTRAL_VS_INDUCED_TREG_DN
GSE45365_NK_CELL_VS_BCELL_DN	145	126	0.38	1.64	0	0.06281	https://www.gsea-msigdb.org/gsea/msigdb/human/geneset/GSE45365_NK_CELL_VS_BCELL_DN
GSE2935_UV_INACTIVATED_VS_LIVE_SENDAI_VIRUS_INF_MACROPHAGE_DN	180	168	0.41	1.64	0.011673	0.0633	https://www.gsea-msigdb.org/gsea/msigdb/human/geneset/GSE2935_UV_INACTIVATED_VS_LIVE_SENDAI_VIRUS_INF_MACROPHAGE_DN
GSE46606_DAY1_VS_DAY3_CD40L_IL2_IL5_STIMULATED_IRF4HIGH_BCELL_DN	200	183	0.44	1.64	0.0019881	0.063327	https://www.gsea-msigdb.org/gsea/msigdb/human/geneset/GSE46606_DAY1_VS_DAY3_CD40L_IL2_IL5_STIMULATED_IRF4HIGH_BCELL_DN
GSE17721_LPS_VS_CPG_2H_BMDC_UP	200	190	0.43	1.64	0.0019493	0.063277	https://www.gsea-msigdb.org/gsea/msigdb/human/geneset/GSE17721_LPS_VS_CPG_2H_BMDC_UP
GSE7348_UNSTIM_VS_LPS_STIM_MACROPHAGE_DN	170	163	0.44	1.64	0.013619	0.063209	https://www.gsea-msigdb.org/gsea/msigdb/human/geneset/GSE7348_UNSTIM_VS_LPS_STIM_MACROPHAGE_DN
GSE22935_WT_VS_MYD88_KO_MACROPHAGE_12H_MBOVIS_BCG_STIM_UP	200	194	0.41	1.64	0	0.063535	https://www.gsea-msigdb.org/gsea/msigdb/human/geneset/GSE22935_WT_VS_MYD88_KO_MACROPHAGE_12H_MBOVIS_BCG_STIM_UP
GSE9988_ANTI_TREM1_VS_ANTI_TREM1_AND_LPS_MONOCYTE_DN	196	184	0.52	1.64	0.031873	0.063823	https://www.gsea-msigdb.org/gsea/msigdb/human/geneset/GSE9988_ANTI_TREM1_VS_ANTI_TREM1_AND_LPS_MONOCYTE_DN
GSE3039_ALPHAALPHA_VS_ALPHABETA_CD8_TCELL_UP	200	186	0.46	1.64	0.030888	0.063822	https://www.gsea-msigdb.org/gsea/msigdb/human/geneset/GSE3039_ALPHAALPHA_VS_ALPHABETA_CD8_TCELL_UP
GSE26290_CTRL_VS_AKT_INHIBITOR_TREATED_ANTI_CD3_AND_IL2_STIM_CD8_TCELL_DN	197	192	0.39	1.64	0.001938	0.063768	https://www.gsea-msigdb.org/gsea/msigdb/human/geneset/GSE26290_CTRL_VS_AKT_INHIBITOR_TREATED_ANTI_CD3_AND_IL2_STIM_CD8_TCELL_DN
GSE11961_MEMORY_BCELL_DAY7_VS_GERMINAL_CENTER_BCELL_DAY7_UP	200	185	0.41	1.64	0.0059642	0.063714	https://www.gsea-msigdb.org/gsea/msigdb/human/geneset/GSE11961_MEMORY_BCELL_DAY7_VS_GERMINAL_CENTER_BCELL_DAY7_UP
GSE9988_ANTI_TREM1_AND_LPS_VS_VEHICLE_TREATED_MONOCYTES_UP	195	180	0.52	1.64	0.023762	0.063744	https://www.gsea-msigdb.org/gsea/msigdb/human/geneset/GSE9988_ANTI_TREM1_AND_LPS_VS_VEHICLE_TREATED_MONOCYTES_UP
GSE37416_CTRL_VS_12H_F_TULARENSIS_LVS_NEUTROPHIL_DN	198	185	0.48	1.64	0.022088	0.063705	https://www.gsea-msigdb.org/gsea/msigdb/human/geneset/GSE37416_CTRL_VS_12H_F_TULARENSIS_LVS_NEUTROPHIL_DN
GSE7400_CTRL_VS_CSF3_IN_VIVO_TREATED_PBMC_DN	198	188	0.39	1.64	0.01341	0.063684	https://www.gsea-msigdb.org/gsea/msigdb/human/geneset/GSE7400_CTRL_VS_CSF3_IN_VIVO_TREATED_PBMC_DN
GSE2770_UNTREATED_VS_IL4_TREATED_ACT_CD4_TCELL_2H_UP	200	189	0.42	1.64	0.010183	0.063602	https://www.gsea-msigdb.org/gsea/msigdb/human/geneset/GSE2770_UNTREATED_VS_IL4_TREATED_ACT_CD4_TCELL_2H_UP
GSE39110_UNTREATED_VS_IL2_TREATED_CD8_TCELL_DAY6_POST_IMMUNIZATION_UP	200	185	0.41	1.64	0.013834	0.063606	https://www.gsea-msigdb.org/gsea/msigdb/human/geneset/GSE39110_UNTREATED_VS_IL2_TREATED_CD8_TCELL_DAY6_POST_IMMUNIZATION_UP
GSE4535_BM_DERIVED_DC_VS_FOLLICULAR_DC_UP	200	189	0.41	1.64	0.012245	0.063562	https://www.gsea-msigdb.org/gsea/msigdb/human/geneset/GSE4535_BM_DERIVED_DC_VS_FOLLICULAR_DC_UP
GSE5503_PLN_DC_VS_SPLEEN_DC_ACTIVATED_ALLOGENIC_TCELL_UP	200	187	0.41	1.64	0.007984	0.063535	https://www.gsea-msigdb.org/gsea/msigdb/human/geneset/GSE5503_PLN_DC_VS_SPLEEN_DC_ACTIVATED_ALLOGENIC_TCELL_UP
GSE17721_PAM3CSK4_VS_GADIQUIMOD_4H_BMDC_DN	200	187	0.41	1.64	0.0019305	0.063484	https://www.gsea-msigdb.org/gsea/msigdb/human/geneset/GSE17721_PAM3CSK4_VS_GADIQUIMOD_4H_BMDC_DN
GSE7852_TREG_VS_TCONV_FAT_UP	200	194	0.38	1.64	0.0019305	0.063629	https://www.gsea-msigdb.org/gsea/msigdb/human/geneset/GSE7852_TREG_VS_TCONV_FAT_UP
GSE43955_TH0_VS_TGFB_IL6_TH17_ACT_CD4_TCELL_52H_UP	200	187	0.38	1.64	0	0.064201	https://www.gsea-msigdb.org/gsea/msigdb/human/geneset/GSE43955_TH0_VS_TGFB_IL6_TH17_ACT_CD4_TCELL_52H_UP
GSE20366_TREG_VS_NAIVE_CD4_TCELL_DEC205_CONVERSION_UP	200	191	0.36	1.64	0.001996	0.064154	https://www.gsea-msigdb.org/gsea/msigdb/human/geneset/GSE20366_TREG_VS_NAIVE_CD4_TCELL_DEC205_CONVERSION_UP
GSE39152_CD103_NEG_VS_POS_MEMORY_CD8_TCELL_DN	200	194	0.45	1.64	0.0077973	0.064164	https://www.gsea-msigdb.org/gsea/msigdb/human/geneset/GSE39152_CD103_NEG_VS_POS_MEMORY_CD8_TCELL_DN
GSE7460_FOXP3_MUT_VS_HET_ACT_TCONV_UP	200	186	0.37	1.64	0.0018315	0.06408	https://www.gsea-msigdb.org/gsea/msigdb/human/geneset/GSE7460_FOXP3_MUT_VS_HET_ACT_TCONV_UP
GSE3039_B2_VS_B1_BCELL_UP	199	188	0.38	1.64	0.0019802	0.064064	https://www.gsea-msigdb.org/gsea/msigdb/human/geneset/GSE3039_B2_VS_B1_BCELL_UP
GSE10273_LOW_IL7_VS_HIGH_IL7_AND_IRF4_IN_IRF4_8_NULL_PRE_BCELL_UP	200	188	0.42	1.64	0.022	0.06398	https://www.gsea-msigdb.org/gsea/msigdb/human/geneset/GSE10273_LOW_IL7_VS_HIGH_IL7_AND_IRF4_IN_IRF4_8_NULL_PRE_BCELL_UP
GSE12366_GC_VS_NAIVE_BCELL_DN	196	182	0.42	1.64	0.023715	0.064109	https://www.gsea-msigdb.org/gsea/msigdb/human/geneset/GSE12366_GC_VS_NAIVE_BCELL_DN
GSE36888_UNTREATED_VS_IL2_TREATED_STAT5_AB_KNOCKIN_TCELL_17H_DN	199	188	0.39	1.64	0.0019608	0.064072	https://www.gsea-msigdb.org/gsea/msigdb/human/geneset/GSE36888_UNTREATED_VS_IL2_TREATED_STAT5_AB_KNOCKIN_TCELL_17H_DN
GSE15767_MED_VS_SCS_MAC_LN_UP	200	185	0.41	1.64	0.011952	0.064075	https://www.gsea-msigdb.org/gsea/msigdb/human/geneset/GSE15767_MED_VS_SCS_MAC_LN_UP
GSE43260_BTLA_POS_VS_NEG_INTRATUMORAL_CD8_TCELL_UP	200	193	0.49	1.64	0.033597	0.064003	https://www.gsea-msigdb.org/gsea/msigdb/human/geneset/GSE43260_BTLA_POS_VS_NEG_INTRATUMORAL_CD8_TCELL_UP
GSE360_CTRL_VS_B_MALAYI_HIGH_DOSE_DC_UP	197	192	0.4	1.64	0.0097276	0.064541	https://www.gsea-msigdb.org/gsea/msigdb/human/geneset/GSE360_CTRL_VS_B_MALAYI_HIGH_DOSE_DC_UP
GSE19941_IL10_KO_VS_IL10_KO_AND_NFKBP50_KO_UNSTIM_MACROPHAGE_DN	200	184	0.38	1.64	0.006012	0.06463	https://www.gsea-msigdb.org/gsea/msigdb/human/geneset/GSE19941_IL10_KO_VS_IL10_KO_AND_NFKBP50_KO_UNSTIM_MACROPHAGE_DN
GSE24726_WT_VS_E2_2_KO_PDC_DN	200	189	0.42	1.64	0.015296	0.064755	https://www.gsea-msigdb.org/gsea/msigdb/human/geneset/GSE24726_WT_VS_E2_2_KO_PDC_DN
GSE13522_CTRL_VS_T_CRUZI_Y_STRAIN_INF_SKIN_IFNAR_KO_UP	200	187	0.38	1.64	0.0094162	0.064741	https://www.gsea-msigdb.org/gsea/msigdb/human/geneset/GSE13522_CTRL_VS_T_CRUZI_Y_STRAIN_INF_SKIN_IFNAR_KO_UP
GSE12392_WT_VS_IFNAR_KO_CD8A_NEG_SPLEEN_DC_UP	200	184	0.42	1.64	0.013183	0.064813	https://www.gsea-msigdb.org/gsea/msigdb/human/geneset/GSE12392_WT_VS_IFNAR_KO_CD8A_NEG_SPLEEN_DC_UP
GSE17721_0.5H_VS_24H_LPS_BMDC_UP	199	186	0.42	1.64	0.012072	0.064797	https://www.gsea-msigdb.org/gsea/msigdb/human/geneset/GSE17721_0.5H_VS_24H_LPS_BMDC_UP
GSE4590_PRE_BCELL_VS_LARGE_PRE_BCELL_UP	160	153	0.38	1.64	0.0019881	0.064879	https://www.gsea-msigdb.org/gsea/msigdb/human/geneset/GSE4590_PRE_BCELL_VS_LARGE_PRE_BCELL_UP
GSE17721_LPS_VS_POLYIC_16H_BMDC_DN	200	193	0.4	1.63	0.005988	0.065142	https://www.gsea-msigdb.org/gsea/msigdb/human/geneset/GSE17721_LPS_VS_POLYIC_16H_BMDC_DN
GSE2770_UNTREATED_VS_IL12_TREATED_ACT_CD4_TCELL_6H_UP	200	185	0.4	1.63	0	0.065113	https://www.gsea-msigdb.org/gsea/msigdb/human/geneset/GSE2770_UNTREATED_VS_IL12_TREATED_ACT_CD4_TCELL_6H_UP
GSE17721_LPS_VS_GARDIQUIMOD_24H_BMDC_UP	199	187	0.4	1.63	0.0019157	0.065227	https://www.gsea-msigdb.org/gsea/msigdb/human/geneset/GSE17721_LPS_VS_GARDIQUIMOD_24H_BMDC_UP
GSE45365_NK_CELL_VS_CD11B_DC_MCMV_INFECTION_DN	200	192	0.4	1.63	0.019455	0.065175	https://www.gsea-msigdb.org/gsea/msigdb/human/geneset/GSE45365_NK_CELL_VS_CD11B_DC_MCMV_INFECTION_DN
GSE9988_ANTI_TREM1_VS_VEHICLE_TREATED_MONOCYTES_DN	197	188	0.48	1.63	0.040936	0.065478	https://www.gsea-msigdb.org/gsea/msigdb/human/geneset/GSE9988_ANTI_TREM1_VS_VEHICLE_TREATED_MONOCYTES_DN
GSE40274_FOXP3_VS_FOXP3_AND_LEF1_TRANSDUCED_ACTIVATED_CD4_TCELL_UP	200	187	0.4	1.63	0.002008	0.065544	https://www.gsea-msigdb.org/gsea/msigdb/human/geneset/GSE40274_FOXP3_VS_FOXP3_AND_LEF1_TRANSDUCED_ACTIVATED_CD4_TCELL_UP
GSE25123_WT_VS_PPARG_KO_MACROPHAGE_IL4_STIM_DN	200	190	0.41	1.63	0.01004	0.065458	https://www.gsea-msigdb.org/gsea/msigdb/human/geneset/GSE25123_WT_VS_PPARG_KO_MACROPHAGE_IL4_STIM_DN
GSE45365_HEALTHY_VS_MCMV_INFECTION_CD11B_DC_DN	196	178	0.43	1.63	0.072435	0.065588	https://www.gsea-msigdb.org/gsea/msigdb/human/geneset/GSE45365_HEALTHY_VS_MCMV_INFECTION_CD11B_DC_DN
GSE17580_TREG_VS_TEFF_UP	200	190	0.39	1.63	0.004	0.065661	https://www.gsea-msigdb.org/gsea/msigdb/human/geneset/GSE17580_TREG_VS_TEFF_UP
GSE20715_0H_VS_24H_OZONE_TLR4_KO_LUNG_DN	200	191	0.41	1.63	0.0057915	0.06572	https://www.gsea-msigdb.org/gsea/msigdb/human/geneset/GSE20715_0H_VS_24H_OZONE_TLR4_KO_LUNG_DN
GSE9988_ANTI_TREM1_AND_LPS_VS_VEHICLE_TREATED_MONOCYTES_DN	197	191	0.5	1.63	0.04845	0.065716	https://www.gsea-msigdb.org/gsea/msigdb/human/geneset/GSE9988_ANTI_TREM1_AND_LPS_VS_VEHICLE_TREATED_MONOCYTES_DN
GSE7852_LN_VS_FAT_TCONV_DN	200	190	0.45	1.63	0.010163	0.065644	https://www.gsea-msigdb.org/gsea/msigdb/human/geneset/GSE7852_LN_VS_FAT_TCONV_DN
GSE17721_CTRL_VS_PAM3CSK4_1H_BMDC_DN	199	188	0.36	1.63	0	0.065578	https://www.gsea-msigdb.org/gsea/msigdb/human/geneset/GSE17721_CTRL_VS_PAM3CSK4_1H_BMDC_DN
GSE17721_0.5H_VS_12H_CPG_BMDC_DN	199	185	0.42	1.63	0.0058027	0.065584	https://www.gsea-msigdb.org/gsea/msigdb/human/geneset/GSE17721_0.5H_VS_12H_CPG_BMDC_DN
GSE33425_CD8_ALPHAALPHA_VS_ALPHABETA_CD161_HIGH_TCELL_UP	200	195	0.42	1.63	0.015779	0.065551	https://www.gsea-msigdb.org/gsea/msigdb/human/geneset/GSE33425_CD8_ALPHAALPHA_VS_ALPHABETA_CD161_HIGH_TCELL_UP
GSE36078_UNTREATED_VS_AD5_T425A_HEXON_INF_MOUSE_LUNG_DC_DN	200	184	0.41	1.63	0.0080972	0.065721	https://www.gsea-msigdb.org/gsea/msigdb/human/geneset/GSE36078_UNTREATED_VS_AD5_T425A_HEXON_INF_MOUSE_LUNG_DC_DN
GSE2770_IL12_ACT_VS_ACT_CD4_TCELL_2H_DN	200	186	0.45	1.63	0.011811	0.065718	https://www.gsea-msigdb.org/gsea/msigdb/human/geneset/GSE2770_IL12_ACT_VS_ACT_CD4_TCELL_2H_DN
GSE12392_IFNAR_KO_VS_IFNB_KO_CD8_NEG_SPLEEN_DC_DN	200	189	0.41	1.63	0.013333	0.065981	https://www.gsea-msigdb.org/gsea/msigdb/human/geneset/GSE12392_IFNAR_KO_VS_IFNB_KO_CD8_NEG_SPLEEN_DC_DN
GSE26343_UNSTIM_VS_LPS_STIM_MACROPHAGE_UP	200	194	0.47	1.63	0.016097	0.06592	https://www.gsea-msigdb.org/gsea/msigdb/human/geneset/GSE26343_UNSTIM_VS_LPS_STIM_MACROPHAGE_UP
GSE15330_LYMPHOID_MULTIPOTENT_VS_PRO_BCELL_DN	200	188	0.46	1.63	0.01002	0.066048	https://www.gsea-msigdb.org/gsea/msigdb/human/geneset/GSE15330_LYMPHOID_MULTIPOTENT_VS_PRO_BCELL_DN
GSE4590_PRE_BCELL_VS_SMALL_PRE_BCELL_UP	155	147	0.36	1.63	0.0037523	0.066005	https://www.gsea-msigdb.org/gsea/msigdb/human/geneset/GSE4590_PRE_BCELL_VS_SMALL_PRE_BCELL_UP
KAECH_NAIVE_VS_DAY8_EFF_CD8_TCELL_DN	200	188	0.5	1.63	0.045908	0.066203	https://www.gsea-msigdb.org/gsea/msigdb/human/geneset/KAECH_NAIVE_VS_DAY8_EFF_CD8_TCELL_DN
GSE22886_NAIVE_CD8_TCELL_VS_NKCELL_DN	197	191	0.43	1.63	0.0077821	0.066115	https://www.gsea-msigdb.org/gsea/msigdb/human/geneset/GSE22886_NAIVE_CD8_TCELL_VS_NKCELL_DN
GSE33292_DN3_THYMOCYTE_VS_TCF1_KO_TCELL_LYMPHOMA_UP	199	194	0.43	1.63	0.020992	0.066048	https://www.gsea-msigdb.org/gsea/msigdb/human/geneset/GSE33292_DN3_THYMOCYTE_VS_TCF1_KO_TCELL_LYMPHOMA_UP
GSE9988_LPS_VS_LPS_AND_ANTI_TREM1_MONOCYTE_UP	198	187	0.47	1.63	0.023483	0.066416	https://www.gsea-msigdb.org/gsea/msigdb/human/geneset/GSE9988_LPS_VS_LPS_AND_ANTI_TREM1_MONOCYTE_UP
GSE1460_CD4_THYMOCYTE_VS_THYMIC_STROMAL_CELL_DN	199	185	0.46	1.63	0.028226	0.066398	https://www.gsea-msigdb.org/gsea/msigdb/human/geneset/GSE1460_CD4_THYMOCYTE_VS_THYMIC_STROMAL_CELL_DN
GSE17721_LPS_VS_POLYIC_1H_BMDC_UP	200	186	0.38	1.63	0.0038314	0.066398	https://www.gsea-msigdb.org/gsea/msigdb/human/geneset/GSE17721_LPS_VS_POLYIC_1H_BMDC_UP
GSE1925_CTRL_VS_IFNG_PRIMED_MACROPHAGE_24H_IFNG_STIM_DN	200	193	0.46	1.63	0.027723	0.066428	https://www.gsea-msigdb.org/gsea/msigdb/human/geneset/GSE1925_CTRL_VS_IFNG_PRIMED_MACROPHAGE_24H_IFNG_STIM_DN
GSE360_L_MAJOR_VS_B_MALAYI_LOW_DOSE_DC_UP	200	194	0.38	1.63	0.0058366	0.066596	https://www.gsea-msigdb.org/gsea/msigdb/human/geneset/GSE360_L_MAJOR_VS_B_MALAYI_LOW_DOSE_DC_UP
GSE26727_WT_VS_KLF2_KO_LPS_STIM_MACROPHAGE_UP	199	187	0.37	1.63	0.0075614	0.066959	https://www.gsea-msigdb.org/gsea/msigdb/human/geneset/GSE26727_WT_VS_KLF2_KO_LPS_STIM_MACROPHAGE_UP
GSE20715_0H_VS_6H_OZONE_TLR4_KO_LUNG_UP	200	190	0.38	1.63	0.0018868	0.066999	https://www.gsea-msigdb.org/gsea/msigdb/human/geneset/GSE20715_0H_VS_6H_OZONE_TLR4_KO_LUNG_UP
GSE2770_IL12_AND_TGFB_ACT_VS_ACT_CD4_TCELL_2H_UP	197	182	0.43	1.63	0.017822	0.067032	https://www.gsea-msigdb.org/gsea/msigdb/human/geneset/GSE2770_IL12_AND_TGFB_ACT_VS_ACT_CD4_TCELL_2H_UP
GSE35685_CD34POS_CD38NEG_VS_CD34POS_CD10POS_BONE_MARROW_DN	200	190	0.51	1.63	0.02863	0.067857	https://www.gsea-msigdb.org/gsea/msigdb/human/geneset/GSE35685_CD34POS_CD38NEG_VS_CD34POS_CD10POS_BONE_MARROW_DN
GSE18791_CTRL_VS_NEWCASTLE_VIRUS_DC_6H_DN	198	187	0.5	1.63	0.052632	0.067789	https://www.gsea-msigdb.org/gsea/msigdb/human/geneset/GSE18791_CTRL_VS_NEWCASTLE_VIRUS_DC_6H_DN
GSE3920_UNTREATED_VS_IFNG_TREATED_FIBROBLAST_UP	166	161	0.37	1.63	0.0038835	0.067736	https://www.gsea-msigdb.org/gsea/msigdb/human/geneset/GSE3920_UNTREATED_VS_IFNG_TREATED_FIBROBLAST_UP
GSE15930_STIM_VS_STIM_AND_TRICHOSTATINA_24H_CD8_T_CELL_UP	199	189	0.37	1.63	0	0.067765	https://www.gsea-msigdb.org/gsea/msigdb/human/geneset/GSE15930_STIM_VS_STIM_AND_TRICHOSTATINA_24H_CD8_T_CELL_UP
GSE19401_PLN_VS_PEYERS_PATCH_FOLLICULAR_DC_DN	199	188	0.5	1.63	0.030303	0.067837	https://www.gsea-msigdb.org/gsea/msigdb/human/geneset/GSE19401_PLN_VS_PEYERS_PATCH_FOLLICULAR_DC_DN
GSE23502_BM_VS_COLON_TUMOR_MYELOID_DERIVED_SUPPRESSOR_CELL_UP	200	188	0.4	1.63	0.006012	0.067788	https://www.gsea-msigdb.org/gsea/msigdb/human/geneset/GSE23502_BM_VS_COLON_TUMOR_MYELOID_DERIVED_SUPPRESSOR_CELL_UP
GSE22601_DOUBLE_NEGATIVE_VS_IMMATURE_CD4_SP_THYMOCYTE_DN	198	178	0.38	1.63	0.0019048	0.06786	https://www.gsea-msigdb.org/gsea/msigdb/human/geneset/GSE22601_DOUBLE_NEGATIVE_VS_IMMATURE_CD4_SP_THYMOCYTE_DN
GSE28726_NAIVE_CD4_TCELL_VS_NAIVE_NKTCELL_UP	200	196	0.49	1.63	0.032323	0.067997	https://www.gsea-msigdb.org/gsea/msigdb/human/geneset/GSE28726_NAIVE_CD4_TCELL_VS_NAIVE_NKTCELL_UP
GSE23321_CENTRAL_VS_EFFECTOR_MEMORY_CD8_TCELL_UP	200	186	0.39	1.63	0.0058824	0.067925	https://www.gsea-msigdb.org/gsea/msigdb/human/geneset/GSE23321_CENTRAL_VS_EFFECTOR_MEMORY_CD8_TCELL_UP
GSE3982_BCELL_VS_EFF_MEMORY_CD4_TCELL_DN	196	188	0.35	1.62	0	0.068155	https://www.gsea-msigdb.org/gsea/msigdb/human/geneset/GSE3982_BCELL_VS_EFF_MEMORY_CD4_TCELL_DN
GSE1448_ANTI_VALPHA2_VS_VBETA5_DP_THYMOCYTE_DN	200	187	0.44	1.62	0.013645	0.068267	https://www.gsea-msigdb.org/gsea/msigdb/human/geneset/GSE1448_ANTI_VALPHA2_VS_VBETA5_DP_THYMOCYTE_DN
GSE24142_EARLY_THYMIC_PROGENITOR_VS_DN2_THYMOCYTE_ADULT_UP	200	191	0.4	1.62	0.027237	0.068214	https://www.gsea-msigdb.org/gsea/msigdb/human/geneset/GSE24142_EARLY_THYMIC_PROGENITOR_VS_DN2_THYMOCYTE_ADULT_UP
GSE13484_UNSTIM_VS_12H_YF17D_VACCINE_STIM_PBMC_DN	200	189	0.44	1.62	0.0099206	0.068161	https://www.gsea-msigdb.org/gsea/msigdb/human/geneset/GSE13484_UNSTIM_VS_12H_YF17D_VACCINE_STIM_PBMC_DN
GSE26030_UNSTIM_VS_RESTIM_TH17_DAY5_POST_POLARIZATION_DN	198	182	0.4	1.62	0.0060362	0.068297	https://www.gsea-msigdb.org/gsea/msigdb/human/geneset/GSE26030_UNSTIM_VS_RESTIM_TH17_DAY5_POST_POLARIZATION_DN
GSE30962_PRIMARY_VS_SECONDARY_ACUTE_LCMV_INF_CD8_TCELL_UP	200	188	0.52	1.62	0.10079	0.068422	https://www.gsea-msigdb.org/gsea/msigdb/human/geneset/GSE30962_PRIMARY_VS_SECONDARY_ACUTE_LCMV_INF_CD8_TCELL_UP
GSE32986_UNSTIM_VS_CURDLAN_LOWDOSE_STIM_DC_UP	200	190	0.48	1.62	0.022222	0.068407	https://www.gsea-msigdb.org/gsea/msigdb/human/geneset/GSE32986_UNSTIM_VS_CURDLAN_LOWDOSE_STIM_DC_UP
GSE19401_UNSTIM_VS_RETINOIC_ACID_AND_PAM2CSK4_STIM_FOLLICULAR_DC_DN	199	194	0.43	1.62	0.013917	0.068435	https://www.gsea-msigdb.org/gsea/msigdb/human/geneset/GSE19401_UNSTIM_VS_RETINOIC_ACID_AND_PAM2CSK4_STIM_FOLLICULAR_DC_DN
GSE19401_UNSTIM_VS_RETINOIC_ACID_STIM_FOLLICULAR_DC_UP	200	190	0.46	1.62	0.034615	0.068428	https://www.gsea-msigdb.org/gsea/msigdb/human/geneset/GSE19401_UNSTIM_VS_RETINOIC_ACID_STIM_FOLLICULAR_DC_UP
GSE29949_CD8_NEG_DC_SPLEEN_VS_CD8_POS_DC_SPLEEN_DN	199	187	0.38	1.62	0.002004	0.068866	https://www.gsea-msigdb.org/gsea/msigdb/human/geneset/GSE29949_CD8_NEG_DC_SPLEEN_VS_CD8_POS_DC_SPLEEN_DN
GSE16385_UNTREATED_VS_12H_IFNG_TNF_TREATED_MACROPHAGE_DN	196	184	0.43	1.62	0.009901	0.068787	https://www.gsea-msigdb.org/gsea/msigdb/human/geneset/GSE16385_UNTREATED_VS_12H_IFNG_TNF_TREATED_MACROPHAGE_DN
GSE37534_UNTREATED_VS_GW1929_TREATED_CD4_TCELL_PPARG1_AND_FOXP3_TRASDUCED_UP	199	192	0.46	1.62	0.007984	0.068849	https://www.gsea-msigdb.org/gsea/msigdb/human/geneset/GSE37534_UNTREATED_VS_GW1929_TREATED_CD4_TCELL_PPARG1_AND_FOXP3_TRASDUCED_UP
GSE2128_C57BL6_VS_NOD_CD4CD8_DP_THYMOCYTE_UP	198	191	0.43	1.62	0.01912	0.068916	https://www.gsea-msigdb.org/gsea/msigdb/human/geneset/GSE2128_C57BL6_VS_NOD_CD4CD8_DP_THYMOCYTE_UP
GSE9650_NAIVE_VS_EXHAUSTED_CD8_TCELL_DN	200	186	0.39	1.62	0.003861	0.06919	https://www.gsea-msigdb.org/gsea/msigdb/human/geneset/GSE9650_NAIVE_VS_EXHAUSTED_CD8_TCELL_DN
GSE16385_MONOCYTE_VS_12H_IL4_TREATED_MACROPHAGE_UP	200	182	0.36	1.62	0	0.069278	https://www.gsea-msigdb.org/gsea/msigdb/human/geneset/GSE16385_MONOCYTE_VS_12H_IL4_TREATED_MACROPHAGE_UP
GSE34179_THPOK_KO_VS_WT_VA14I_NKTCELL_DN	199	188	0.42	1.62	0.001992	0.069539	https://www.gsea-msigdb.org/gsea/msigdb/human/geneset/GSE34179_THPOK_KO_VS_WT_VA14I_NKTCELL_DN
GSE26030_TH1_VS_TH17_RESTIMULATED_DAY15_POST_POLARIZATION_UP	199	182	0.45	1.62	0.026585	0.069777	https://www.gsea-msigdb.org/gsea/msigdb/human/geneset/GSE26030_TH1_VS_TH17_RESTIMULATED_DAY15_POST_POLARIZATION_UP
GSE6875_TCONV_VS_FOXP3_KO_TREG_UP	198	185	0.37	1.62	0.0075901	0.069909	https://www.gsea-msigdb.org/gsea/msigdb/human/geneset/GSE6875_TCONV_VS_FOXP3_KO_TREG_UP
GSE3982_CENT_MEMORY_CD4_TCELL_VS_TH1_DN	200	188	0.56	1.62	0.062626	0.070269	https://www.gsea-msigdb.org/gsea/msigdb/human/geneset/GSE3982_CENT_MEMORY_CD4_TCELL_VS_TH1_DN
GSE22313_HEALTHY_VS_SLE_MOUSE_CD4_TCELL_DN	200	188	0.47	1.62	0.050201	0.070303	https://www.gsea-msigdb.org/gsea/msigdb/human/geneset/GSE22313_HEALTHY_VS_SLE_MOUSE_CD4_TCELL_DN
GSE17721_12H_VS_24H_GARDIQUIMOD_BMDC_UP	199	188	0.42	1.62	0.0078585	0.070259	https://www.gsea-msigdb.org/gsea/msigdb/human/geneset/GSE17721_12H_VS_24H_GARDIQUIMOD_BMDC_UP
GSE36392_TYPE_2_MYELOID_VS_EOSINOPHIL_IL25_TREATED_LUNG_DN	200	183	0.39	1.62	0.0079681	0.070452	https://www.gsea-msigdb.org/gsea/msigdb/human/geneset/GSE36392_TYPE_2_MYELOID_VS_EOSINOPHIL_IL25_TREATED_LUNG_DN
GSE43955_TH0_VS_TGFB_IL6_TH17_ACT_CD4_TCELL_60H_DN	200	193	0.34	1.62	0.0019342	0.070391	https://www.gsea-msigdb.org/gsea/msigdb/human/geneset/GSE43955_TH0_VS_TGFB_IL6_TH17_ACT_CD4_TCELL_60H_DN
GSE12845_IGD_NEG_BLOOD_VS_NAIVE_TONSIL_BCELL_UP	198	188	0.52	1.62	0.045908	0.070378	https://www.gsea-msigdb.org/gsea/msigdb/human/geneset/GSE12845_IGD_NEG_BLOOD_VS_NAIVE_TONSIL_BCELL_UP
GSE3982_DC_VS_MAC_DN	200	195	0.4	1.62	0.01	0.070658	https://www.gsea-msigdb.org/gsea/msigdb/human/geneset/GSE3982_DC_VS_MAC_DN
GSE28737_WT_VS_BCL6_KO_FOLLICULAR_BCELL_UP	200	185	0.36	1.62	0.0018939	0.070839	https://www.gsea-msigdb.org/gsea/msigdb/human/geneset/GSE28737_WT_VS_BCL6_KO_FOLLICULAR_BCELL_UP
GSE360_LOW_DOSE_B_MALAYI_VS_M_TUBERCULOSIS_MAC_DN	199	192	0.42	1.62	0.0059172	0.070778	https://www.gsea-msigdb.org/gsea/msigdb/human/geneset/GSE360_LOW_DOSE_B_MALAYI_VS_M_TUBERCULOSIS_MAC_DN
GSE1460_INTRATHYMIC_T_PROGENITOR_VS_DP_THYMOCYTE_UP	198	188	0.39	1.62	0.0039526	0.070725	https://www.gsea-msigdb.org/gsea/msigdb/human/geneset/GSE1460_INTRATHYMIC_T_PROGENITOR_VS_DP_THYMOCYTE_UP
GSE360_L_MAJOR_VS_T_GONDII_MAC_UP	197	189	0.37	1.62	0.0075472	0.070673	https://www.gsea-msigdb.org/gsea/msigdb/human/geneset/GSE360_L_MAJOR_VS_T_GONDII_MAC_UP
GSE7831_CPG_VS_INFLUENZA_STIM_PDC_1H_DN	200	193	0.36	1.62	0.011299	0.070595	https://www.gsea-msigdb.org/gsea/msigdb/human/geneset/GSE7831_CPG_VS_INFLUENZA_STIM_PDC_1H_DN
GSE2405_HEAT_KILLED_LYSATE_VS_LIVE_A_PHAGOCYTOPHILUM_STIM_NEUTROPHIL_9H_UP	199	193	0.43	1.62	0.057426	0.070682	https://www.gsea-msigdb.org/gsea/msigdb/human/geneset/GSE2405_HEAT_KILLED_LYSATE_VS_LIVE_A_PHAGOCYTOPHILUM_STIM_NEUTROPHIL_9H_UP
GSE360_CTRL_VS_B_MALAYI_HIGH_DOSE_MAC_DN	200	197	0.41	1.62	0	0.070687	https://www.gsea-msigdb.org/gsea/msigdb/human/geneset/GSE360_CTRL_VS_B_MALAYI_HIGH_DOSE_MAC_DN
GSE21670_STAT3_KO_VS_WT_CD4_TCELL_DN	199	190	0.47	1.62	0.030181	0.070703	https://www.gsea-msigdb.org/gsea/msigdb/human/geneset/GSE21670_STAT3_KO_VS_WT_CD4_TCELL_DN
GSE34006_A2AR_KO_VS_A2AR_AGONIST_TREATED_TREG_UP	200	188	0.48	1.62	0.039063	0.070746	https://www.gsea-msigdb.org/gsea/msigdb/human/geneset/GSE34006_A2AR_KO_VS_A2AR_AGONIST_TREATED_TREG_UP
GSE28726_NAIVE_VS_ACTIVATED_VA24NEG_NKTCELL_UP	200	191	0.5	1.62	0.059172	0.070838	https://www.gsea-msigdb.org/gsea/msigdb/human/geneset/GSE28726_NAIVE_VS_ACTIVATED_VA24NEG_NKTCELL_UP
GSE40666_NAIVE_VS_EFFECTOR_CD8_TCELL_WITH_IFNA_STIM_90MIN_UP	200	188	0.39	1.62	0.0039216	0.070814	https://www.gsea-msigdb.org/gsea/msigdb/human/geneset/GSE40666_NAIVE_VS_EFFECTOR_CD8_TCELL_WITH_IFNA_STIM_90MIN_UP
GSE360_T_GONDII_VS_B_MALAYI_HIGH_DOSE_MAC_UP	199	187	0.4	1.62	0.015968	0.070726	https://www.gsea-msigdb.org/gsea/msigdb/human/geneset/GSE360_T_GONDII_VS_B_MALAYI_HIGH_DOSE_MAC_UP
GSE1460_INTRATHYMIC_T_PROGENITOR_VS_THYMIC_STROMAL_CELL_DN	200	191	0.49	1.62	0.046939	0.070835	https://www.gsea-msigdb.org/gsea/msigdb/human/geneset/GSE1460_INTRATHYMIC_T_PROGENITOR_VS_THYMIC_STROMAL_CELL_DN
GSE24574_BCL6_HIGH_TFH_VS_NAIVE_CD4_TCELL_UP	198	190	0.37	1.62	0.0094877	0.070855	https://www.gsea-msigdb.org/gsea/msigdb/human/geneset/GSE24574_BCL6_HIGH_TFH_VS_NAIVE_CD4_TCELL_UP
GSE3982_DC_VS_TH2_UP	200	193	0.37	1.62	0.0080321	0.071175	https://www.gsea-msigdb.org/gsea/msigdb/human/geneset/GSE3982_DC_VS_TH2_UP
GSE3982_MAST_CELL_VS_NEUTROPHIL_DN	197	184	0.4	1.61	0.024345	0.071788	https://www.gsea-msigdb.org/gsea/msigdb/human/geneset/GSE3982_MAST_CELL_VS_NEUTROPHIL_DN
GSE7460_FOXP3_MUT_VS_WT_ACT_WITH_TGFB_TCONV_UP	200	185	0.41	1.61	0.01004	0.072937	https://www.gsea-msigdb.org/gsea/msigdb/human/geneset/GSE7460_FOXP3_MUT_VS_WT_ACT_WITH_TGFB_TCONV_UP
GSE43863_TH1_VS_LY6C_INT_CXCR5POS_MEMORY_CD4_TCELL_UP	200	192	0.48	1.61	0.043912	0.072908	https://www.gsea-msigdb.org/gsea/msigdb/human/geneset/GSE43863_TH1_VS_LY6C_INT_CXCR5POS_MEMORY_CD4_TCELL_UP
GSE20715_0H_VS_48H_OZONE_LUNG_DN	200	191	0.5	1.61	0.058	0.072873	https://www.gsea-msigdb.org/gsea/msigdb/human/geneset/GSE20715_0H_VS_48H_OZONE_LUNG_DN
GSE41867_MEMORY_VS_EXHAUSTED_CD8_TCELL_DAY30_LCMV_DN	200	192	0.39	1.61	0	0.073207	https://www.gsea-msigdb.org/gsea/msigdb/human/geneset/GSE41867_MEMORY_VS_EXHAUSTED_CD8_TCELL_DAY30_LCMV_DN
GSE17301_ACD3_ACD28_VS_ACD3_ACD28_AND_IFNA5_STIM_CD8_TCELL_UP	198	184	0.42	1.61	0.038835	0.073132	https://www.gsea-msigdb.org/gsea/msigdb/human/geneset/GSE17301_ACD3_ACD28_VS_ACD3_ACD28_AND_IFNA5_STIM_CD8_TCELL_UP
GSE17721_CTRL_VS_PAM3CSK4_2H_BMDC_DN	200	187	0.34	1.61	0	0.073341	https://www.gsea-msigdb.org/gsea/msigdb/human/geneset/GSE17721_CTRL_VS_PAM3CSK4_2H_BMDC_DN
GSE3982_BCELL_VS_NKCELL_DN	197	187	0.4	1.61	0.0035971	0.073472	https://www.gsea-msigdb.org/gsea/msigdb/human/geneset/GSE3982_BCELL_VS_NKCELL_DN
GSE44955_MCSF_VS_MCSF_AND_IL27_STIM_MACROPHAGE_DN	199	189	0.39	1.61	0.017013	0.073405	https://www.gsea-msigdb.org/gsea/msigdb/human/geneset/GSE44955_MCSF_VS_MCSF_AND_IL27_STIM_MACROPHAGE_DN
GSE6674_UNSTIM_VS_CPG_STIM_BCELL_DN	164	152	0.4	1.61	0.0056711	0.073575	https://www.gsea-msigdb.org/gsea/msigdb/human/geneset/GSE6674_UNSTIM_VS_CPG_STIM_BCELL_DN
GSE360_L_DONOVANI_VS_B_MALAYI_HIGH_DOSE_MAC_DN	200	193	0.47	1.61	0.051233	0.073629	https://www.gsea-msigdb.org/gsea/msigdb/human/geneset/GSE360_L_DONOVANI_VS_B_MALAYI_HIGH_DOSE_MAC_DN
GSE37534_UNTREATED_VS_ROSIGLITAZONE_TREATED_CD4_TCELL_PPARG1_AND_FOXP3_TRASDUCED_DN	199	190	0.48	1.61	0.042	0.073639	https://www.gsea-msigdb.org/gsea/msigdb/human/geneset/GSE37534_UNTREATED_VS_ROSIGLITAZONE_TREATED_CD4_TCELL_PPARG1_AND_FOXP3_TRASDUCED_DN
GSE28726_NAIVE_VS_ACTIVATED_CD4_TCELL_DN	199	191	0.52	1.61	0.089109	0.073723	https://www.gsea-msigdb.org/gsea/msigdb/human/geneset/GSE28726_NAIVE_VS_ACTIVATED_CD4_TCELL_DN
GSE40273_GATA1_KO_VS_WT_TREG_DN	200	193	0.4	1.61	0.006012	0.073756	https://www.gsea-msigdb.org/gsea/msigdb/human/geneset/GSE40273_GATA1_KO_VS_WT_TREG_DN
GSE27241_CTRL_VS_DIGOXIN_TREATED_CD4_TCELL_IN_TH17_POLARIZING_CONDITIONS_UP	162	149	0.41	1.61	0.013109	0.07385	https://www.gsea-msigdb.org/gsea/msigdb/human/geneset/GSE27241_CTRL_VS_DIGOXIN_TREATED_CD4_TCELL_IN_TH17_POLARIZING_CONDITIONS_UP
GSE339_CD8POS_VS_CD4CD8DN_DC_UP	200	187	0.4	1.61	0	0.073911	https://www.gsea-msigdb.org/gsea/msigdb/human/geneset/GSE339_CD8POS_VS_CD4CD8DN_DC_UP
GSE3720_VD1_VS_VD2_GAMMADELTA_TCELL_UP	198	185	0.41	1.61	0.02924	0.074435	https://www.gsea-msigdb.org/gsea/msigdb/human/geneset/GSE3720_VD1_VS_VD2_GAMMADELTA_TCELL_UP
GSE6092_B_BURGDOFERI_VS_B_BURGDORFERI_AND_IFNG_STIM_ENDOTHELIAL_CELL_DN	180	175	0.43	1.61	0.011696	0.074446	https://www.gsea-msigdb.org/gsea/msigdb/human/geneset/GSE6092_B_BURGDOFERI_VS_B_BURGDORFERI_AND_IFNG_STIM_ENDOTHELIAL_CELL_DN
GSE9037_WT_VS_IRAK4_KO_BMDM_DN	200	184	0.34	1.61	0.0036036	0.074395	https://www.gsea-msigdb.org/gsea/msigdb/human/geneset/GSE9037_WT_VS_IRAK4_KO_BMDM_DN
GSE43863_NAIVE_VS_LY6C_LOW_CXCR5NEG_CD4_EFF_TCELL_D6_LCMV_DN	196	182	0.43	1.61	0.020716	0.074429	https://www.gsea-msigdb.org/gsea/msigdb/human/geneset/GSE43863_NAIVE_VS_LY6C_LOW_CXCR5NEG_CD4_EFF_TCELL_D6_LCMV_DN
GSE7219_WT_VS_NIK_NFKB2_KO_LPS_AND_ANTI_CD40_STIM_DC_DN	200	187	0.39	1.61	0.0058366	0.074681	https://www.gsea-msigdb.org/gsea/msigdb/human/geneset/GSE7219_WT_VS_NIK_NFKB2_KO_LPS_AND_ANTI_CD40_STIM_DC_DN
GSE21063_CTRL_VS_ANTI_IGM_STIM_BCELL_8H_UP	153	140	0.4	1.61	0.0057692	0.074966	https://www.gsea-msigdb.org/gsea/msigdb/human/geneset/GSE21063_CTRL_VS_ANTI_IGM_STIM_BCELL_8H_UP
GSE40443_INDUCED_VS_TOTAL_TREG_DN	200	181	0.39	1.61	0.015686	0.074882	https://www.gsea-msigdb.org/gsea/msigdb/human/geneset/GSE40443_INDUCED_VS_TOTAL_TREG_DN
GSE27786_CD4_TCELL_VS_NKTCELL_DN	200	189	0.41	1.61	0.0020576	0.074815	https://www.gsea-msigdb.org/gsea/msigdb/human/geneset/GSE27786_CD4_TCELL_VS_NKTCELL_DN
GSE7219_UNSTIM_VS_LPS_AND_ANTI_CD40_STIM_NIK_NFKB2_KO_DC_DN	190	181	0.44	1.61	0.023576	0.07496	https://www.gsea-msigdb.org/gsea/msigdb/human/geneset/GSE7219_UNSTIM_VS_LPS_AND_ANTI_CD40_STIM_NIK_NFKB2_KO_DC_DN
GSE21063_3H_VS_16H_ANTI_IGM_STIM_NFATC1_KOBCELL_UP	199	185	0.34	1.61	0	0.075137	https://www.gsea-msigdb.org/gsea/msigdb/human/geneset/GSE21063_3H_VS_16H_ANTI_IGM_STIM_NFATC1_KOBCELL_UP
GSE46606_IRF4MID_VS_WT_CD40L_IL2_IL5_DAY1_STIMULATED_BCELL_DN	199	187	0.42	1.61	0.0058708	0.075265	https://www.gsea-msigdb.org/gsea/msigdb/human/geneset/GSE46606_IRF4MID_VS_WT_CD40L_IL2_IL5_DAY1_STIMULATED_BCELL_DN
GSE24142_EARLY_THYMIC_PROGENITOR_VS_DN3_THYMOCYTE_FETAL_UP	200	192	0.42	1.61	0.015564	0.075304	https://www.gsea-msigdb.org/gsea/msigdb/human/geneset/GSE24142_EARLY_THYMIC_PROGENITOR_VS_DN3_THYMOCYTE_FETAL_UP
GSE34156_UNTREATED_VS_6H_NOD2_LIGAND_TREATED_MONOCYTE_DN	177	168	0.44	1.61	0.024	0.075325	https://www.gsea-msigdb.org/gsea/msigdb/human/geneset/GSE34156_UNTREATED_VS_6H_NOD2_LIGAND_TREATED_MONOCYTE_DN
GSE32901_NAIVE_VS_TH1_CD4_TCELL_DN	170	160	0.44	1.61	0.015873	0.075266	https://www.gsea-msigdb.org/gsea/msigdb/human/geneset/GSE32901_NAIVE_VS_TH1_CD4_TCELL_DN
GSE5960_TH1_VS_ANERGIC_TH1_DN	200	193	0.4	1.61	0.0098425	0.075248	https://www.gsea-msigdb.org/gsea/msigdb/human/geneset/GSE5960_TH1_VS_ANERGIC_TH1_DN
GSE24102_GRANULOCYSTIC_MDSC_VS_NEUTROPHIL_DN	200	190	0.43	1.61	0.027027	0.075169	https://www.gsea-msigdb.org/gsea/msigdb/human/geneset/GSE24102_GRANULOCYSTIC_MDSC_VS_NEUTROPHIL_DN
GSE29618_BCELL_VS_PDC_DAY7_FLU_VACCINE_UP	194	181	0.46	1.61	0.052953	0.075316	https://www.gsea-msigdb.org/gsea/msigdb/human/geneset/GSE29618_BCELL_VS_PDC_DAY7_FLU_VACCINE_UP
GSE37532_WT_VS_PPARG_KO_VISCERAL_ADIPOSE_TISSUE_TCONV_UP	199	185	0.38	1.61	0.011742	0.07534	https://www.gsea-msigdb.org/gsea/msigdb/human/geneset/GSE37532_WT_VS_PPARG_KO_VISCERAL_ADIPOSE_TISSUE_TCONV_UP
GSE15330_LYMPHOID_MULTIPOTENT_VS_GRANULOCYTE_MONOCYTE_PROGENITOR_IKAROS_KO_DN	200	188	0.41	1.61	0.003992	0.075361	https://www.gsea-msigdb.org/gsea/msigdb/human/geneset/GSE15330_LYMPHOID_MULTIPOTENT_VS_GRANULOCYTE_MONOCYTE_PROGENITOR_IKAROS_KO_DN
GSE17186_NAIVE_VS_CD21LOW_TRANSITIONAL_BCELL_UP	200	191	0.45	1.61	0.025391	0.07528	https://www.gsea-msigdb.org/gsea/msigdb/human/geneset/GSE17186_NAIVE_VS_CD21LOW_TRANSITIONAL_BCELL_UP
GSE15930_STIM_VS_STIM_AND_IFNAB_24H_CD8_T_CELL_DN	199	190	0.35	1.6	0	0.075563	https://www.gsea-msigdb.org/gsea/msigdb/human/geneset/GSE15930_STIM_VS_STIM_AND_IFNAB_24H_CD8_T_CELL_DN
GSE24574_BCL6_HIGH_TFH_VS_NAIVE_CD4_TCELL_DN	200	195	0.48	1.6	0.045187	0.07593	https://www.gsea-msigdb.org/gsea/msigdb/human/geneset/GSE24574_BCL6_HIGH_TFH_VS_NAIVE_CD4_TCELL_DN
GSE7831_1H_VS_4H_CPG_STIM_PDC_DN	199	183	0.4	1.6	0.0097656	0.075851	https://www.gsea-msigdb.org/gsea/msigdb/human/geneset/GSE7831_1H_VS_4H_CPG_STIM_PDC_DN
GSE2197_IMMUNOSUPPRESSIVE_DNA_VS_UNTREATED_IN_DC_UP	200	185	0.42	1.6	0.004008	0.076324	https://www.gsea-msigdb.org/gsea/msigdb/human/geneset/GSE2197_IMMUNOSUPPRESSIVE_DNA_VS_UNTREATED_IN_DC_UP
GSE14769_20MIN_VS_360MIN_LPS_BMDM_DN	200	186	0.36	1.6	0.0038685	0.076579	https://www.gsea-msigdb.org/gsea/msigdb/human/geneset/GSE14769_20MIN_VS_360MIN_LPS_BMDM_DN
GSE32034_UNTREATED_VS_ROSIGLIZATONE_TREATED_LY6C_HIGH_MONOCYTE_UP	200	188	0.41	1.6	0.0098814	0.076637	https://www.gsea-msigdb.org/gsea/msigdb/human/geneset/GSE32034_UNTREATED_VS_ROSIGLIZATONE_TREATED_LY6C_HIGH_MONOCYTE_UP
GSE35543_IN_VITRO_ITREG_VS_CONVERTED_EX_ITREG_DN	198	182	0.37	1.6	0.0092764	0.076894	https://www.gsea-msigdb.org/gsea/msigdb/human/geneset/GSE35543_IN_VITRO_ITREG_VS_CONVERTED_EX_ITREG_DN
GSE28737_FOLLICULAR_VS_MARGINAL_ZONE_BCELL_DN	200	187	0.32	1.6	0	0.076982	https://www.gsea-msigdb.org/gsea/msigdb/human/geneset/GSE28737_FOLLICULAR_VS_MARGINAL_ZONE_BCELL_DN
GSE40274_CTRL_VS_LEF1_TRANSDUCED_ACTIVATED_CD4_TCELL_UP	172	165	0.39	1.6	0.013861	0.076974	https://www.gsea-msigdb.org/gsea/msigdb/human/geneset/GSE40274_CTRL_VS_LEF1_TRANSDUCED_ACTIVATED_CD4_TCELL_UP
GSE2585_CTEC_VS_MTEC_THYMUS_UP	200	180	0.39	1.6	0.023166	0.076916	https://www.gsea-msigdb.org/gsea/msigdb/human/geneset/GSE2585_CTEC_VS_MTEC_THYMUS_UP
GSE26669_CD4_VS_CD8_TCELL_IN_MLR_UP	200	191	0.39	1.6	0.0097847	0.076991	https://www.gsea-msigdb.org/gsea/msigdb/human/geneset/GSE26669_CD4_VS_CD8_TCELL_IN_MLR_UP
GSE43955_1H_VS_60H_ACT_CD4_TCELL_WITH_TGFB_IL6_DN	200	188	0.39	1.6	0.003992	0.076967	https://www.gsea-msigdb.org/gsea/msigdb/human/geneset/GSE43955_1H_VS_60H_ACT_CD4_TCELL_WITH_TGFB_IL6_DN
GSE7831_UNSTIM_VS_CPG_STIM_PDC_1H_UP	200	190	0.43	1.6	0.0079523	0.076956	https://www.gsea-msigdb.org/gsea/msigdb/human/geneset/GSE7831_UNSTIM_VS_CPG_STIM_PDC_1H_UP
GSE21063_CTRL_VS_ANTI_IGM_STIM_BCELL_NFATC1_KO_3H_UP	200	186	0.41	1.6	0.011811	0.076918	https://www.gsea-msigdb.org/gsea/msigdb/human/geneset/GSE21063_CTRL_VS_ANTI_IGM_STIM_BCELL_NFATC1_KO_3H_UP
GSE28130_ACTIVATED_VS_INDUCEED_TREG_DN	196	183	0.33	1.6	0	0.077598	https://www.gsea-msigdb.org/gsea/msigdb/human/geneset/GSE28130_ACTIVATED_VS_INDUCEED_TREG_DN
GSE9650_GP33_VS_GP276_LCMV_SPECIFIC_EXHAUSTED_CD8_TCELL_UP	200	187	0.37	1.6	0.0094877	0.07769	https://www.gsea-msigdb.org/gsea/msigdb/human/geneset/GSE9650_GP33_VS_GP276_LCMV_SPECIFIC_EXHAUSTED_CD8_TCELL_UP
GSE7764_NKCELL_VS_SPLENOCYTE_DN	200	194	0.41	1.6	0.0078431	0.077894	https://www.gsea-msigdb.org/gsea/msigdb/human/geneset/GSE7764_NKCELL_VS_SPLENOCYTE_DN
GSE20715_0H_VS_24H_OZONE_LUNG_UP	200	190	0.41	1.6	0.017857	0.077902	https://www.gsea-msigdb.org/gsea/msigdb/human/geneset/GSE20715_0H_VS_24H_OZONE_LUNG_UP
GSE17721_LPS_VS_GARDIQUIMOD_12H_BMDC_UP	199	189	0.43	1.6	0.022133	0.077915	https://www.gsea-msigdb.org/gsea/msigdb/human/geneset/GSE17721_LPS_VS_GARDIQUIMOD_12H_BMDC_UP
GSE22601_IMMATURE_CD4_SINGLE_POSITIVE_VS_CD4_SINGLE_POSITIVE_THYMOCYTE_UP	200	191	0.45	1.6	0.011811	0.077827	https://www.gsea-msigdb.org/gsea/msigdb/human/geneset/GSE22601_IMMATURE_CD4_SINGLE_POSITIVE_VS_CD4_SINGLE_POSITIVE_THYMOCYTE_UP
GSE28726_NAIVE_CD4_TCELL_VS_NAIVE_VA24NEG_NKTCELL_UP	200	192	0.53	1.6	0.086694	0.077847	https://www.gsea-msigdb.org/gsea/msigdb/human/geneset/GSE28726_NAIVE_CD4_TCELL_VS_NAIVE_VA24NEG_NKTCELL_UP
KAECH_DAY8_EFF_VS_MEMORY_CD8_TCELL_UP	200	186	0.52	1.6	0.068273	0.078007	https://www.gsea-msigdb.org/gsea/msigdb/human/geneset/KAECH_DAY8_EFF_VS_MEMORY_CD8_TCELL_UP
GSE15324_ELF4_KO_VS_WT_NAIVE_CD8_TCELL_UP	200	188	0.33	1.6	0	0.077984	https://www.gsea-msigdb.org/gsea/msigdb/human/geneset/GSE15324_ELF4_KO_VS_WT_NAIVE_CD8_TCELL_UP
GSE5503_MLN_DC_VS_SPLEEN_DC_ACTIVATED_ALLOGENIC_TCELL_UP	200	187	0.38	1.6	0.0096899	0.077984	https://www.gsea-msigdb.org/gsea/msigdb/human/geneset/GSE5503_MLN_DC_VS_SPLEEN_DC_ACTIVATED_ALLOGENIC_TCELL_UP
GSE22501_PERIPHERAL_BLOOD_VS_CORD_BLOOD_TREG_DN	199	186	0.37	1.6	0.003992	0.078096	https://www.gsea-msigdb.org/gsea/msigdb/human/geneset/GSE22501_PERIPHERAL_BLOOD_VS_CORD_BLOOD_TREG_DN
GSE15624_CTRL_VS_6H_HALOFUGINONE_TREATED_CD4_TCELL_UP	133	120	0.36	1.6	0.0038241	0.0781	https://www.gsea-msigdb.org/gsea/msigdb/human/geneset/GSE15624_CTRL_VS_6H_HALOFUGINONE_TREATED_CD4_TCELL_UP
GSE9650_NAIVE_VS_EFF_CD8_TCELL_DN	199	189	0.49	1.6	0.036072	0.078206	https://www.gsea-msigdb.org/gsea/msigdb/human/geneset/GSE9650_NAIVE_VS_EFF_CD8_TCELL_DN
GSE16385_IL4_VS_ROSIGLITAZONE_STIM_MACROPHAGE_DN	195	173	0.37	1.6	0.0018797	0.078311	https://www.gsea-msigdb.org/gsea/msigdb/human/geneset/GSE16385_IL4_VS_ROSIGLITAZONE_STIM_MACROPHAGE_DN
GSE3920_IFNA_VS_IFNG_TREATED_FIBROBLAST_UP	175	166	0.36	1.6	0.0077369	0.078286	https://www.gsea-msigdb.org/gsea/msigdb/human/geneset/GSE3920_IFNA_VS_IFNG_TREATED_FIBROBLAST_UP
GSE40273_GATA1_KO_VS_WT_TREG_UP	200	184	0.47	1.6	0.034343	0.078313	https://www.gsea-msigdb.org/gsea/msigdb/human/geneset/GSE40273_GATA1_KO_VS_WT_TREG_UP
GSE360_L_MAJOR_VS_T_GONDII_DC_DN	198	188	0.36	1.6	0.007533	0.078391	https://www.gsea-msigdb.org/gsea/msigdb/human/geneset/GSE360_L_MAJOR_VS_T_GONDII_DC_DN
GSE43955_TGFB_IL6_VS_TGFB_IL6_IL23_TH17_ACT_CD4_TCELL_52H_UP	200	188	0.35	1.6	0.0037807	0.078387	https://www.gsea-msigdb.org/gsea/msigdb/human/geneset/GSE43955_TGFB_IL6_VS_TGFB_IL6_IL23_TH17_ACT_CD4_TCELL_52H_UP
GSE21670_UNTREATED_VS_IL6_TREATED_STAT3_KO_CD4_TCELL_DN	197	189	0.5	1.6	0.055888	0.078846	https://www.gsea-msigdb.org/gsea/msigdb/human/geneset/GSE21670_UNTREATED_VS_IL6_TREATED_STAT3_KO_CD4_TCELL_DN
GSE2585_CTEC_VS_THYMIC_MACROPHAGE_UP	200	184	0.35	1.6	0	0.078842	https://www.gsea-msigdb.org/gsea/msigdb/human/geneset/GSE2585_CTEC_VS_THYMIC_MACROPHAGE_UP
GSE40666_UNTREATED_VS_IFNA_STIM_STAT1_KO_CD8_TCELL_90MIN_UP	193	178	0.37	1.6	0.0089445	0.07894	https://www.gsea-msigdb.org/gsea/msigdb/human/geneset/GSE40666_UNTREATED_VS_IFNA_STIM_STAT1_KO_CD8_TCELL_90MIN_UP
GSE37301_COMMON_LYMPHOID_PROGENITOR_VS_GRAN_MONO_PROGENITOR_UP	200	191	0.42	1.6	0.014228	0.078968	https://www.gsea-msigdb.org/gsea/msigdb/human/geneset/GSE37301_COMMON_LYMPHOID_PROGENITOR_VS_GRAN_MONO_PROGENITOR_UP
GSE44649_WT_VS_MIR155_KO_NAIVE_CD8_TCELL_DN	200	193	0.4	1.6	0.0058708	0.079151	https://www.gsea-msigdb.org/gsea/msigdb/human/geneset/GSE44649_WT_VS_MIR155_KO_NAIVE_CD8_TCELL_DN
GSE5679_PPARG_LIGAND_ROSIGLITAZONE_VS_RARA_AGONIST_AM580_TREATED_DC_DN	200	186	0.36	1.6	0.0038095	0.07919	https://www.gsea-msigdb.org/gsea/msigdb/human/geneset/GSE5679_PPARG_LIGAND_ROSIGLITAZONE_VS_RARA_AGONIST_AM580_TREATED_DC_DN
GSE3982_NEUTROPHIL_VS_TH1_UP	197	181	0.34	1.59	0.0076628	0.07958	https://www.gsea-msigdb.org/gsea/msigdb/human/geneset/GSE3982_NEUTROPHIL_VS_TH1_UP
GSE24574_BCL6_HIGH_TFH_VS_TFH_CD4_TCELL_UP	197	190	0.32	1.59	0	0.079648	https://www.gsea-msigdb.org/gsea/msigdb/human/geneset/GSE24574_BCL6_HIGH_TFH_VS_TFH_CD4_TCELL_UP
GSE7219_WT_VS_NIK_NFKB2_KO_LPS_AND_ANTI_CD40_STIM_DC_UP	200	189	0.4	1.59	0.01217	0.079761	https://www.gsea-msigdb.org/gsea/msigdb/human/geneset/GSE7219_WT_VS_NIK_NFKB2_KO_LPS_AND_ANTI_CD40_STIM_DC_UP
GSE7831_1H_VS_4H_INFLUENZA_STIM_PDC_UP	200	192	0.38	1.59	0.0077369	0.079999	https://www.gsea-msigdb.org/gsea/msigdb/human/geneset/GSE7831_1H_VS_4H_INFLUENZA_STIM_PDC_UP
GSE20500_RETINOIC_ACID_VS_RARA_ANTAGONIST_TREATED_CD4_TCELL_UP	198	189	0.35	1.59	0.0018975	0.079913	https://www.gsea-msigdb.org/gsea/msigdb/human/geneset/GSE20500_RETINOIC_ACID_VS_RARA_ANTAGONIST_TREATED_CD4_TCELL_UP
GSE13547_WT_VS_ZFX_KO_BCELL_DN	178	165	0.48	1.59	0.050607	0.07985	https://www.gsea-msigdb.org/gsea/msigdb/human/geneset/GSE13547_WT_VS_ZFX_KO_BCELL_DN
GSE24634_TREG_VS_TCONV_POST_DAY5_IL4_CONVERSION_DN	198	192	0.45	1.59	0.059273	0.079996	https://www.gsea-msigdb.org/gsea/msigdb/human/geneset/GSE24634_TREG_VS_TCONV_POST_DAY5_IL4_CONVERSION_DN
GSE20152_SPHK1_KO_VS_WT_HTNFA_OVERXPRESS_ANKLE_UP	198	189	0.37	1.59	0.0039604	0.079956	https://www.gsea-msigdb.org/gsea/msigdb/human/geneset/GSE20152_SPHK1_KO_VS_WT_HTNFA_OVERXPRESS_ANKLE_UP
GSE39820_CTRL_VS_IL1B_IL6_IL23A_CD4_TCELL_DN	200	195	0.4	1.59	0.0098039	0.079886	https://www.gsea-msigdb.org/gsea/msigdb/human/geneset/GSE39820_CTRL_VS_IL1B_IL6_IL23A_CD4_TCELL_DN
GSE3982_MEMORY_CD4_TCELL_VS_BCELL_UP	199	191	0.37	1.59	0.01341	0.079953	https://www.gsea-msigdb.org/gsea/msigdb/human/geneset/GSE3982_MEMORY_CD4_TCELL_VS_BCELL_UP
GSE21063_CTRL_VS_ANTI_IGM_STIM_BCELL_NFATC1_KO_16H_UP	200	185	0.37	1.59	0.015066	0.079873	https://www.gsea-msigdb.org/gsea/msigdb/human/geneset/GSE21063_CTRL_VS_ANTI_IGM_STIM_BCELL_NFATC1_KO_16H_UP
GSE24142_EARLY_THYMIC_PROGENITOR_VS_DN3_THYMOCYTE_DN	198	187	0.38	1.59	0.0096712	0.080519	https://www.gsea-msigdb.org/gsea/msigdb/human/geneset/GSE24142_EARLY_THYMIC_PROGENITOR_VS_DN3_THYMOCYTE_DN
GSE18281_CORTEX_VS_MEDULLA_THYMUS_DN	196	180	0.37	1.59	0.011673	0.080655	https://www.gsea-msigdb.org/gsea/msigdb/human/geneset/GSE18281_CORTEX_VS_MEDULLA_THYMUS_DN
GSE43955_TH0_VS_TGFB_IL6_TH17_ACT_CD4_TCELL_1H_UP	200	190	0.41	1.59	0.017857	0.08102	https://www.gsea-msigdb.org/gsea/msigdb/human/geneset/GSE43955_TH0_VS_TGFB_IL6_TH17_ACT_CD4_TCELL_1H_UP
GSE19198_CTRL_VS_IL21_TREATED_TCELL_1H_DN	199	190	0.39	1.59	0.0099602	0.080993	https://www.gsea-msigdb.org/gsea/msigdb/human/geneset/GSE19198_CTRL_VS_IL21_TREATED_TCELL_1H_DN
GSE24142_EARLY_THYMIC_PROGENITOR_VS_DN3_THYMOCYTE_ADULT_UP	200	192	0.38	1.59	0.01751	0.081296	https://www.gsea-msigdb.org/gsea/msigdb/human/geneset/GSE24142_EARLY_THYMIC_PROGENITOR_VS_DN3_THYMOCYTE_ADULT_UP
GSE43955_TH0_VS_TGFB_IL6_TH17_ACT_CD4_TCELL_4H_DN	200	192	0.38	1.59	0.012097	0.081276	https://www.gsea-msigdb.org/gsea/msigdb/human/geneset/GSE43955_TH0_VS_TGFB_IL6_TH17_ACT_CD4_TCELL_4H_DN
GSE36476_YOUNG_VS_OLD_DONOR_MEMORY_CD4_TCELL_72H_TSST_ACT_UP	199	182	0.34	1.59	0	0.081239	https://www.gsea-msigdb.org/gsea/msigdb/human/geneset/GSE36476_YOUNG_VS_OLD_DONOR_MEMORY_CD4_TCELL_72H_TSST_ACT_UP
GSE17721_LPS_VS_POLYIC_24H_BMDC_DN	199	189	0.38	1.59	0.007767	0.081242	https://www.gsea-msigdb.org/gsea/msigdb/human/geneset/GSE17721_LPS_VS_POLYIC_24H_BMDC_DN
GSE9960_HEALTHY_VS_SEPSIS_PBMC_UP	195	180	0.4	1.59	0.015296	0.081184	https://www.gsea-msigdb.org/gsea/msigdb/human/geneset/GSE9960_HEALTHY_VS_SEPSIS_PBMC_UP
GSE22589_HEALTHY_VS_SIV_INFECTED_DC_DN	199	186	0.37	1.59	0.0078895	0.081205	https://www.gsea-msigdb.org/gsea/msigdb/human/geneset/GSE22589_HEALTHY_VS_SIV_INFECTED_DC_DN
GSE11057_CD4_EFF_MEM_VS_PBMC_DN	194	188	0.42	1.59	0.044402	0.081204	https://www.gsea-msigdb.org/gsea/msigdb/human/geneset/GSE11057_CD4_EFF_MEM_VS_PBMC_DN
GSE43863_DAY6_EFF_VS_DAY150_MEM_TFH_CD4_TCELL_DN	198	184	0.39	1.59	0	0.08116	https://www.gsea-msigdb.org/gsea/msigdb/human/geneset/GSE43863_DAY6_EFF_VS_DAY150_MEM_TFH_CD4_TCELL_DN
GSE31622_WT_VS_KLF3_KO_BCELL_DN	200	189	0.38	1.59	0.0097466	0.081185	https://www.gsea-msigdb.org/gsea/msigdb/human/geneset/GSE31622_WT_VS_KLF3_KO_BCELL_DN
GSE17721_CTRL_VS_CPG_12H_BMDC_DN	199	182	0.41	1.59	0.015414	0.081496	https://www.gsea-msigdb.org/gsea/msigdb/human/geneset/GSE17721_CTRL_VS_CPG_12H_BMDC_DN
GSE21927_GMCSF_IL6_VS_GMCSF_GCSF_TREATED_BONE_MARROW_UP	187	169	0.33	1.59	0	0.081596	https://www.gsea-msigdb.org/gsea/msigdb/human/geneset/GSE21927_GMCSF_IL6_VS_GMCSF_GCSF_TREATED_BONE_MARROW_UP
GSE30083_SP2_VS_SP4_THYMOCYTE_DN	200	187	0.36	1.59	0.014953	0.081915	https://www.gsea-msigdb.org/gsea/msigdb/human/geneset/GSE30083_SP2_VS_SP4_THYMOCYTE_DN
GSE34205_HEALTHY_VS_RSV_INF_INFANT_PBMC_DN	200	187	0.38	1.59	0.021739	0.081829	https://www.gsea-msigdb.org/gsea/msigdb/human/geneset/GSE34205_HEALTHY_VS_RSV_INF_INFANT_PBMC_DN
GSE21927_SPLEEN_MONOCYTE_VS_GMCSF_GCSF_BONE_MARROW_DN	196	183	0.38	1.59	0.0019455	0.081908	https://www.gsea-msigdb.org/gsea/msigdb/human/geneset/GSE21927_SPLEEN_MONOCYTE_VS_GMCSF_GCSF_BONE_MARROW_DN
GSE5679_CTRL_VS_RARA_AGONIST_AM580_TREATED_DC_UP	200	189	0.54	1.59	0.091977	0.081917	https://www.gsea-msigdb.org/gsea/msigdb/human/geneset/GSE5679_CTRL_VS_RARA_AGONIST_AM580_TREATED_DC_UP
GSE2585_CTEC_VS_THYMIC_DC_DN	200	190	0.35	1.59	0.011472	0.081915	https://www.gsea-msigdb.org/gsea/msigdb/human/geneset/GSE2585_CTEC_VS_THYMIC_DC_DN
GSE3982_MAST_CELL_VS_BCELL_UP	200	185	0.38	1.59	0.0019194	0.081827	https://www.gsea-msigdb.org/gsea/msigdb/human/geneset/GSE3982_MAST_CELL_VS_BCELL_UP
GSE1566_WT_VS_EZH2_KO_LN_TCELL_UP	198	174	0.36	1.59	0.0037594	0.081753	https://www.gsea-msigdb.org/gsea/msigdb/human/geneset/GSE1566_WT_VS_EZH2_KO_LN_TCELL_UP
GSE25123_IL4_VS_IL4_AND_ROSIGLITAZONE_STIM_PPARG_KO_MACROPHAGE_DAY10_UP	142	132	0.4	1.59	0.0059289	0.081859	https://www.gsea-msigdb.org/gsea/msigdb/human/geneset/GSE25123_IL4_VS_IL4_AND_ROSIGLITAZONE_STIM_PPARG_KO_MACROPHAGE_DAY10_UP
GSE17721_LPS_VS_CPG_6H_BMDC_UP	200	190	0.37	1.59	0.0079523	0.081848	https://www.gsea-msigdb.org/gsea/msigdb/human/geneset/GSE17721_LPS_VS_CPG_6H_BMDC_UP
GSE16385_UNTREATED_VS_12H_ROSIGLITAZONE_TREATED_MACROPHAGE_DN	193	180	0.35	1.59	0.0056604	0.081861	https://www.gsea-msigdb.org/gsea/msigdb/human/geneset/GSE16385_UNTREATED_VS_12H_ROSIGLITAZONE_TREATED_MACROPHAGE_DN
GSE33424_CD161_HIGH_VS_NEG_CD8_TCELL_UP	200	196	0.42	1.59	0.025341	0.082228	https://www.gsea-msigdb.org/gsea/msigdb/human/geneset/GSE33424_CD161_HIGH_VS_NEG_CD8_TCELL_UP
GSE17721_CPG_VS_GARDIQUIMOD_12H_BMDC_UP	200	183	0.36	1.59	0.0018832	0.082182	https://www.gsea-msigdb.org/gsea/msigdb/human/geneset/GSE17721_CPG_VS_GARDIQUIMOD_12H_BMDC_UP
GSE42021_TREG_PLN_VS_CD24INT_TREG_THYMUS_UP	200	193	0.47	1.59	0.045545	0.082154	https://www.gsea-msigdb.org/gsea/msigdb/human/geneset/GSE42021_TREG_PLN_VS_CD24INT_TREG_THYMUS_UP
GSE8678_IL7R_LOW_VS_HIGH_EFF_CD8_TCELL_UP	199	192	0.34	1.59	0.0018975	0.082179	https://www.gsea-msigdb.org/gsea/msigdb/human/geneset/GSE8678_IL7R_LOW_VS_HIGH_EFF_CD8_TCELL_UP
GSE37301_COMMON_LYMPHOID_PROGENITOR_VS_CD4_TCELL_UP	200	183	0.42	1.59	0.028283	0.082103	https://www.gsea-msigdb.org/gsea/msigdb/human/geneset/GSE37301_COMMON_LYMPHOID_PROGENITOR_VS_CD4_TCELL_UP
GSE14386_UNTREATED_VS_IFNA_TREATED_ACT_PBMC_MS_PATIENT_DN	159	153	0.43	1.59	0.031683	0.082202	https://www.gsea-msigdb.org/gsea/msigdb/human/geneset/GSE14386_UNTREATED_VS_IFNA_TREATED_ACT_PBMC_MS_PATIENT_DN
GSE5589_LPS_VS_LPS_AND_IL6_STIM_IL10_KO_MACROPHAGE_45MIN_DN	199	190	0.42	1.58	0.012121	0.083024	https://www.gsea-msigdb.org/gsea/msigdb/human/geneset/GSE5589_LPS_VS_LPS_AND_IL6_STIM_IL10_KO_MACROPHAGE_45MIN_DN
GSE3982_DC_VS_TH1_DN	199	185	0.44	1.58	0.037773	0.083097	https://www.gsea-msigdb.org/gsea/msigdb/human/geneset/GSE3982_DC_VS_TH1_DN
GSE40274_CTRL_VS_FOXP3_AND_XBP1_TRANSDUCED_ACTIVATED_CD4_TCELL_UP	167	155	0.46	1.58	0.064257	0.083009	https://www.gsea-msigdb.org/gsea/msigdb/human/geneset/GSE40274_CTRL_VS_FOXP3_AND_XBP1_TRANSDUCED_ACTIVATED_CD4_TCELL_UP
GSE27859_MACROPHAGE_VS_CD11C_INT_F480_INT_DC_DN	199	186	0.45	1.58	0.057803	0.083043	https://www.gsea-msigdb.org/gsea/msigdb/human/geneset/GSE27859_MACROPHAGE_VS_CD11C_INT_F480_INT_DC_DN
GSE17721_LPS_VS_GARDIQUIMOD_1H_BMDC_UP	200	189	0.37	1.58	0.012727	0.082963	https://www.gsea-msigdb.org/gsea/msigdb/human/geneset/GSE17721_LPS_VS_GARDIQUIMOD_1H_BMDC_UP
GSE2770_IL12_VS_IL4_TREATED_ACT_CD4_TCELL_2H_DN	159	150	0.33	1.58	0	0.083047	https://www.gsea-msigdb.org/gsea/msigdb/human/geneset/GSE2770_IL12_VS_IL4_TREATED_ACT_CD4_TCELL_2H_DN
GSE22025_UNTREATED_VS_PROGESTERONE_TREATED_CD4_TCELL_DN	200	188	0.39	1.58	0.0019802	0.083075	https://www.gsea-msigdb.org/gsea/msigdb/human/geneset/GSE22025_UNTREATED_VS_PROGESTERONE_TREATED_CD4_TCELL_DN
GSE23505_IL6_IL1_IL23_VS_IL6_IL1_TGFB_TREATED_CD4_TCELL_UP	200	189	0.39	1.58	0.005848	0.083648	https://www.gsea-msigdb.org/gsea/msigdb/human/geneset/GSE23505_IL6_IL1_IL23_VS_IL6_IL1_TGFB_TREATED_CD4_TCELL_UP
GSE6259_FLT3L_INDUCED_33D1_POS_DC_VS_CD4_TCELL_DN	170	154	0.44	1.58	0.033597	0.083582	https://www.gsea-msigdb.org/gsea/msigdb/human/geneset/GSE6259_FLT3L_INDUCED_33D1_POS_DC_VS_CD4_TCELL_DN
GSE9037_WT_VS_IRAK4_KO_LPS_4H_STIM_BMDM_DN	200	192	0.36	1.58	0.004065	0.083595	https://www.gsea-msigdb.org/gsea/msigdb/human/geneset/GSE9037_WT_VS_IRAK4_KO_LPS_4H_STIM_BMDM_DN
GSE41978_ID2_KO_VS_BIM_KO_KLRG1_LOW_EFFECTOR_CD8_TCELL_DN	200	188	0.32	1.58	0	0.083575	https://www.gsea-msigdb.org/gsea/msigdb/human/geneset/GSE41978_ID2_KO_VS_BIM_KO_KLRG1_LOW_EFFECTOR_CD8_TCELL_DN
GSE29164_UNTREATED_VS_CD8_TCELL_TREATED_MELANOMA_DAY3_DN	200	189	0.39	1.58	0.018797	0.083629	https://www.gsea-msigdb.org/gsea/msigdb/human/geneset/GSE29164_UNTREATED_VS_CD8_TCELL_TREATED_MELANOMA_DAY3_DN
GSE37416_CTRL_VS_6H_F_TULARENSIS_LVS_NEUTROPHIL_DN	196	185	0.44	1.58	0.036145	0.083665	https://www.gsea-msigdb.org/gsea/msigdb/human/geneset/GSE37416_CTRL_VS_6H_F_TULARENSIS_LVS_NEUTROPHIL_DN
GSE26928_NAIVE_VS_CENT_MEMORY_CD4_TCELL_DN	193	180	0.39	1.58	0.025591	0.084284	https://www.gsea-msigdb.org/gsea/msigdb/human/geneset/GSE26928_NAIVE_VS_CENT_MEMORY_CD4_TCELL_DN
GSE1791_CTRL_VS_NEUROMEDINU_IN_T_CELL_LINE_0.8H_DN	194	183	0.35	1.58	0.0039216	0.084218	https://www.gsea-msigdb.org/gsea/msigdb/human/geneset/GSE1791_CTRL_VS_NEUROMEDINU_IN_T_CELL_LINE_0.8H_DN
GSE11961_GERMINAL_CENTER_BCELL_DAY7_VS_GERMINAL_CENTER_BCELL_DAY40_UP	199	189	0.39	1.58	0.024194	0.084268	https://www.gsea-msigdb.org/gsea/msigdb/human/geneset/GSE11961_GERMINAL_CENTER_BCELL_DAY7_VS_GERMINAL_CENTER_BCELL_DAY40_UP
GSE45739_UNSTIM_VS_ACD3_ACD28_STIM_WT_CD4_TCELL_DN	200	185	0.4	1.58	0.021277	0.084457	https://www.gsea-msigdb.org/gsea/msigdb/human/geneset/GSE45739_UNSTIM_VS_ACD3_ACD28_STIM_WT_CD4_TCELL_DN
GSE40274_FOXP3_VS_FOXP3_AND_GATA1_TRANSDUCED_ACTIVATED_CD4_TCELL_DN	199	187	0.35	1.58	0.0074627	0.084689	https://www.gsea-msigdb.org/gsea/msigdb/human/geneset/GSE40274_FOXP3_VS_FOXP3_AND_GATA1_TRANSDUCED_ACTIVATED_CD4_TCELL_DN
GSE1460_INTRATHYMIC_T_PROGENITOR_VS_DP_THYMOCYTE_DN	197	185	0.39	1.58	0.0095238	0.084806	https://www.gsea-msigdb.org/gsea/msigdb/human/geneset/GSE1460_INTRATHYMIC_T_PROGENITOR_VS_DP_THYMOCYTE_DN
GSE17721_CTRL_VS_CPG_8H_BMDC_DN	200	191	0.39	1.58	0.01938	0.084947	https://www.gsea-msigdb.org/gsea/msigdb/human/geneset/GSE17721_CTRL_VS_CPG_8H_BMDC_DN
GSE6674_ANTI_IGM_VS_ANTI_IGM_AND_CPG_STIM_BCELL_DN	199	186	0.46	1.58	0.067179	0.085044	https://www.gsea-msigdb.org/gsea/msigdb/human/geneset/GSE6674_ANTI_IGM_VS_ANTI_IGM_AND_CPG_STIM_BCELL_DN
GSE17721_LPS_VS_PAM3CSK4_24H_BMDC_DN	200	182	0.4	1.58	0.015779	0.084982	https://www.gsea-msigdb.org/gsea/msigdb/human/geneset/GSE17721_LPS_VS_PAM3CSK4_24H_BMDC_DN
GSE37416_CTRL_VS_48H_F_TULARENSIS_LVS_NEUTROPHIL_UP	193	178	0.36	1.58	0.0077369	0.085709	https://www.gsea-msigdb.org/gsea/msigdb/human/geneset/GSE37416_CTRL_VS_48H_F_TULARENSIS_LVS_NEUTROPHIL_UP
GSE9878_CTRL_VS_EBF_TRANSDUCED_PAX5_KO_PRO_BCELL_UP	200	190	0.37	1.58	0.033645	0.086204	https://www.gsea-msigdb.org/gsea/msigdb/human/geneset/GSE9878_CTRL_VS_EBF_TRANSDUCED_PAX5_KO_PRO_BCELL_UP
GSE45365_NK_CELL_VS_BCELL_UP	198	190	0.45	1.58	0.034137	0.08654	https://www.gsea-msigdb.org/gsea/msigdb/human/geneset/GSE45365_NK_CELL_VS_BCELL_UP
GSE20366_TREG_VS_NAIVE_CD4_TCELL_DN	199	185	0.37	1.58	0.010929	0.086921	https://www.gsea-msigdb.org/gsea/msigdb/human/geneset/GSE20366_TREG_VS_NAIVE_CD4_TCELL_DN
GSE18804_SPLEEN_MACROPHAGE_VS_COLON_TUMORAL_MACROPHAGE_UP	200	191	0.43	1.58	0.034549	0.086914	https://www.gsea-msigdb.org/gsea/msigdb/human/geneset/GSE18804_SPLEEN_MACROPHAGE_VS_COLON_TUMORAL_MACROPHAGE_UP
GSE24574_NAIVE_VS_TCONV_CD4_TCELL_DN	200	192	0.54	1.58	0.056911	0.08693	https://www.gsea-msigdb.org/gsea/msigdb/human/geneset/GSE24574_NAIVE_VS_TCONV_CD4_TCELL_DN
GSE557_CIITA_KO_VS_I_AB_KO_DC_UP	200	187	0.41	1.58	0.02924	0.086839	https://www.gsea-msigdb.org/gsea/msigdb/human/geneset/GSE557_CIITA_KO_VS_I_AB_KO_DC_UP
GSE43955_1H_VS_60H_ACT_CD4_TCELL_DN	199	193	0.34	1.58	0.0038241	0.086788	https://www.gsea-msigdb.org/gsea/msigdb/human/geneset/GSE43955_1H_VS_60H_ACT_CD4_TCELL_DN
GSE17721_PAM3CSK4_VS_GADIQUIMOD_24H_BMDC_UP	200	194	0.38	1.58	0.017078	0.08682	https://www.gsea-msigdb.org/gsea/msigdb/human/geneset/GSE17721_PAM3CSK4_VS_GADIQUIMOD_24H_BMDC_UP
GSE37416_0H_VS_12H_F_TULARENSIS_LVS_NEUTROPHIL_DN	199	191	0.46	1.58	0.023529	0.086735	https://www.gsea-msigdb.org/gsea/msigdb/human/geneset/GSE37416_0H_VS_12H_F_TULARENSIS_LVS_NEUTROPHIL_DN
GSE24726_WT_VS_E2_2_KO_PDC_DAY4_POST_DELETION_UP	200	194	0.41	1.58	0.023256	0.08665	https://www.gsea-msigdb.org/gsea/msigdb/human/geneset/GSE24726_WT_VS_E2_2_KO_PDC_DAY4_POST_DELETION_UP
GSE1460_DP_THYMOCYTE_VS_THYMIC_STROMAL_CELL_DN	200	190	0.43	1.58	0.0040323	0.086763	https://www.gsea-msigdb.org/gsea/msigdb/human/geneset/GSE1460_DP_THYMOCYTE_VS_THYMIC_STROMAL_CELL_DN
GSE360_L_DONOVANI_VS_B_MALAYI_LOW_DOSE_MAC_DN	199	188	0.43	1.58	0.023622	0.086675	https://www.gsea-msigdb.org/gsea/msigdb/human/geneset/GSE360_L_DONOVANI_VS_B_MALAYI_LOW_DOSE_MAC_DN
GSE32901_TH1_VS_TH17_NEG_CD4_TCELL_DN	124	111	0.38	1.58	0.013619	0.086613	https://www.gsea-msigdb.org/gsea/msigdb/human/geneset/GSE32901_TH1_VS_TH17_NEG_CD4_TCELL_DN
GSE41867_DAY6_VS_DAY8_LCMV_ARMSTRONG_EFFECTOR_CD8_TCELL_UP	200	190	0.44	1.58	0.016293	0.086926	https://www.gsea-msigdb.org/gsea/msigdb/human/geneset/GSE41867_DAY6_VS_DAY8_LCMV_ARMSTRONG_EFFECTOR_CD8_TCELL_UP
GSE25087_TREG_VS_TCONV_ADULT_UP	199	183	0.42	1.57	0.013889	0.086939	https://www.gsea-msigdb.org/gsea/msigdb/human/geneset/GSE25087_TREG_VS_TCONV_ADULT_UP
GSE24634_IL4_VS_CTRL_TREATED_NAIVE_CD4_TCELL_DAY7_UP	198	186	0.49	1.57	0.099206	0.086856	https://www.gsea-msigdb.org/gsea/msigdb/human/geneset/GSE24634_IL4_VS_CTRL_TREATED_NAIVE_CD4_TCELL_DAY7_UP
GSE37534_GW1929_VS_ROSIGLITAZONE_TREATED_CD4_TCELL_PPARG1_FOXP3_TRANSDUCED_UP	166	153	0.37	1.57	0.0057252	0.086777	https://www.gsea-msigdb.org/gsea/msigdb/human/geneset/GSE37534_GW1929_VS_ROSIGLITAZONE_TREATED_CD4_TCELL_PPARG1_FOXP3_TRANSDUCED_UP
GSE7548_DAY7_VS_DAY28_PCC_IMMUNIZATION_CD4_TCELL_DN	199	180	0.42	1.57	0.031008	0.086754	https://www.gsea-msigdb.org/gsea/msigdb/human/geneset/GSE7548_DAY7_VS_DAY28_PCC_IMMUNIZATION_CD4_TCELL_DN
GSE5589_UNSTIM_VS_180MIN_LPS_AND_IL10_STIM_MACROPHAGE_DN	199	189	0.4	1.57	0.022857	0.086719	https://www.gsea-msigdb.org/gsea/msigdb/human/geneset/GSE5589_UNSTIM_VS_180MIN_LPS_AND_IL10_STIM_MACROPHAGE_DN
GSE9960_GRAM_NEG_VS_GRAM_NEG_AND_POS_SEPSIS_PBMC_UP	190	172	0.4	1.57	0.003663	0.086925	https://www.gsea-msigdb.org/gsea/msigdb/human/geneset/GSE9960_GRAM_NEG_VS_GRAM_NEG_AND_POS_SEPSIS_PBMC_UP
GSE3337_CTRL_VS_4H_IFNG_IN_CD8POS_DC_UP	200	192	0.38	1.57	0.018868	0.086872	https://www.gsea-msigdb.org/gsea/msigdb/human/geneset/GSE3337_CTRL_VS_4H_IFNG_IN_CD8POS_DC_UP
GSE3982_BASOPHIL_VS_TH1_DN	199	185	0.48	1.57	0.068273	0.087173	https://www.gsea-msigdb.org/gsea/msigdb/human/geneset/GSE3982_BASOPHIL_VS_TH1_DN
GSE33424_CD161_HIGH_VS_NEG_CD8_TCELL_DN	199	187	0.42	1.57	0.03992	0.087194	https://www.gsea-msigdb.org/gsea/msigdb/human/geneset/GSE33424_CD161_HIGH_VS_NEG_CD8_TCELL_DN
GSE7460_TCONV_VS_TREG_LN_DN	200	191	0.41	1.57	0.010267	0.087612	https://www.gsea-msigdb.org/gsea/msigdb/human/geneset/GSE7460_TCONV_VS_TREG_LN_DN
GSE3982_MAST_CELL_VS_EFF_MEMORY_CD4_TCELL_UP	199	186	0.44	1.57	0.0080483	0.087723	https://www.gsea-msigdb.org/gsea/msigdb/human/geneset/GSE3982_MAST_CELL_VS_EFF_MEMORY_CD4_TCELL_UP
GSE29949_MICROGLIA_BRAIN_VS_CD8_NEG_DC_SPLEEN_UP	195	185	0.33	1.57	0.0036969	0.087778	https://www.gsea-msigdb.org/gsea/msigdb/human/geneset/GSE29949_MICROGLIA_BRAIN_VS_CD8_NEG_DC_SPLEEN_UP
GSE5679_CTRL_VS_PPARG_LIGAND_ROSIGLITAZONE_TREATED_DC_UP	200	185	0.56	1.57	0.094488	0.087781	https://www.gsea-msigdb.org/gsea/msigdb/human/geneset/GSE5679_CTRL_VS_PPARG_LIGAND_ROSIGLITAZONE_TREATED_DC_UP
GSE13306_RA_VS_UNTREATED_TCONV_DN	200	181	0.32	1.57	0	0.087716	https://www.gsea-msigdb.org/gsea/msigdb/human/geneset/GSE13306_RA_VS_UNTREATED_TCONV_DN
GSE13485_DAY7_VS_DAY21_YF17D_VACCINE_PBMC_UP	197	192	0.45	1.57	0.043137	0.08769	https://www.gsea-msigdb.org/gsea/msigdb/human/geneset/GSE13485_DAY7_VS_DAY21_YF17D_VACCINE_PBMC_UP
GSE16385_ROSIGLITAZONE_IL4_VS_IL4_ALONE_STIM_MACROPHAGE_12H_UP	200	192	0.44	1.57	0.03629	0.087672	https://www.gsea-msigdb.org/gsea/msigdb/human/geneset/GSE16385_ROSIGLITAZONE_IL4_VS_IL4_ALONE_STIM_MACROPHAGE_12H_UP
GSE26669_CTRL_VS_COSTIM_BLOCK_MLR_CD8_TCELL_UP	200	188	0.45	1.57	0.068834	0.08759	https://www.gsea-msigdb.org/gsea/msigdb/human/geneset/GSE26669_CTRL_VS_COSTIM_BLOCK_MLR_CD8_TCELL_UP
GSE28737_BCL6_HET_VS_BCL6_KO_FOLLICULAR_BCELL_DN	200	189	0.4	1.57	0.038388	0.087737	https://www.gsea-msigdb.org/gsea/msigdb/human/geneset/GSE28737_BCL6_HET_VS_BCL6_KO_FOLLICULAR_BCELL_DN
GSE36392_TYPE_2_MYELOID_VS_NEUTROPHIL_IL25_TREATED_LUNG_UP	200	191	0.35	1.57	0.0039526	0.08775	https://www.gsea-msigdb.org/gsea/msigdb/human/geneset/GSE36392_TYPE_2_MYELOID_VS_NEUTROPHIL_IL25_TREATED_LUNG_UP
GSE3982_MAST_CELL_VS_NKCELL_DN	199	191	0.36	1.57	0.011091	0.088031	https://www.gsea-msigdb.org/gsea/msigdb/human/geneset/GSE3982_MAST_CELL_VS_NKCELL_DN
GSE22601_IMMATURE_CD4_SINGLE_POSITIVE_VS_DOUBLE_POSITIVE_THYMOCYTE_UP	198	166	0.42	1.57	0.0055659	0.087997	https://www.gsea-msigdb.org/gsea/msigdb/human/geneset/GSE22601_IMMATURE_CD4_SINGLE_POSITIVE_VS_DOUBLE_POSITIVE_THYMOCYTE_UP
GSE2706_LPS_VS_R848_AND_LPS_8H_STIM_DC_DN	196	183	0.37	1.57	0.0038168	0.088006	https://www.gsea-msigdb.org/gsea/msigdb/human/geneset/GSE2706_LPS_VS_R848_AND_LPS_8H_STIM_DC_DN
GSE15930_STIM_VS_STIM_AND_IL12_48H_CD8_T_CELL_UP	200	192	0.37	1.57	0.0077821	0.087952	https://www.gsea-msigdb.org/gsea/msigdb/human/geneset/GSE15930_STIM_VS_STIM_AND_IL12_48H_CD8_T_CELL_UP
GSE2770_TGFB_AND_IL4_VS_IL12_TREATED_ACT_CD4_TCELL_48H_DN	199	192	0.42	1.57	0.01992	0.088223	https://www.gsea-msigdb.org/gsea/msigdb/human/geneset/GSE2770_TGFB_AND_IL4_VS_IL12_TREATED_ACT_CD4_TCELL_48H_DN
GSE4590_PRE_BCELL_VS_VPREB_POS_LARGE_PRE_BCELL_UP	157	152	0.34	1.57	0.0038986	0.088206	https://www.gsea-msigdb.org/gsea/msigdb/human/geneset/GSE4590_PRE_BCELL_VS_VPREB_POS_LARGE_PRE_BCELL_UP
GSE4748_CTRL_VS_LPS_AND_CYANOBACTERIUM_LPSLIKE_STIM_DC_3H_UP	200	187	0.43	1.57	0.01217	0.088128	https://www.gsea-msigdb.org/gsea/msigdb/human/geneset/GSE4748_CTRL_VS_LPS_AND_CYANOBACTERIUM_LPSLIKE_STIM_DC_3H_UP
GSE19888_ADENOSINE_A3R_INH_VS_ACT_IN_MAST_CELL_DN	199	188	0.38	1.57	0.012987	0.088235	https://www.gsea-msigdb.org/gsea/msigdb/human/geneset/GSE19888_ADENOSINE_A3R_INH_VS_ACT_IN_MAST_CELL_DN
GSE3982_BCELL_VS_TH2_UP	197	185	0.37	1.57	0.013645	0.088184	https://www.gsea-msigdb.org/gsea/msigdb/human/geneset/GSE3982_BCELL_VS_TH2_UP
GSE22886_CD4_TCELL_VS_BCELL_NAIVE_UP	199	187	0.47	1.57	0.060904	0.088253	https://www.gsea-msigdb.org/gsea/msigdb/human/geneset/GSE22886_CD4_TCELL_VS_BCELL_NAIVE_UP
GSE23568_ID3_TRANSDUCED_VS_ID3_KO_CD8_TCELL_UP	200	192	0.42	1.57	0.041176	0.08826	https://www.gsea-msigdb.org/gsea/msigdb/human/geneset/GSE23568_ID3_TRANSDUCED_VS_ID3_KO_CD8_TCELL_UP
GSE7509_UNSTIM_VS_FCGRIIB_STIM_DC_UP	174	169	0.36	1.57	0.0057915	0.088459	https://www.gsea-msigdb.org/gsea/msigdb/human/geneset/GSE7509_UNSTIM_VS_FCGRIIB_STIM_DC_UP
GSE36392_MAC_VS_NEUTROPHIL_IL25_TREATED_LUNG_DN	200	185	0.34	1.57	0.0038462	0.088397	https://www.gsea-msigdb.org/gsea/msigdb/human/geneset/GSE36392_MAC_VS_NEUTROPHIL_IL25_TREATED_LUNG_DN
GSE24142_EARLY_THYMIC_PROGENITOR_VS_DN2_THYMOCYTE_FETAL_DN	200	183	0.33	1.57	0.0018416	0.088635	https://www.gsea-msigdb.org/gsea/msigdb/human/geneset/GSE24142_EARLY_THYMIC_PROGENITOR_VS_DN2_THYMOCYTE_FETAL_DN
GSE17974_0H_VS_24H_IN_VITRO_ACT_CD4_TCELL_DN	198	190	0.49	1.57	0.084337	0.088767	https://www.gsea-msigdb.org/gsea/msigdb/human/geneset/GSE17974_0H_VS_24H_IN_VITRO_ACT_CD4_TCELL_DN
GSE43957_UNTREATED_VS_NACL_TREATED_ANTI_CD3_CD28_STIM_CD4_TCELL_DN	200	194	0.41	1.57	0.015625	0.088884	https://www.gsea-msigdb.org/gsea/msigdb/human/geneset/GSE43957_UNTREATED_VS_NACL_TREATED_ANTI_CD3_CD28_STIM_CD4_TCELL_DN
GSE37534_GW1929_VS_PIOGLITAZONE_TREATED_CD4_TCELL_PPARG1_FOXP3_TRANSDUCED_UP	198	187	0.4	1.57	0.027829	0.089315	https://www.gsea-msigdb.org/gsea/msigdb/human/geneset/GSE37534_GW1929_VS_PIOGLITAZONE_TREATED_CD4_TCELL_PPARG1_FOXP3_TRANSDUCED_UP
GSE34006_UNTREATED_VS_A2AR_AGONIST_TREATED_TREG_DN	200	192	0.4	1.57	0.036398	0.089454	https://www.gsea-msigdb.org/gsea/msigdb/human/geneset/GSE34006_UNTREATED_VS_A2AR_AGONIST_TREATED_TREG_DN
GSE5142_CTRL_VS_HTERT_TRANSDUCED_CD8_TCELL_EARLY_PASSAGE_CLONE_DN	200	177	0.36	1.57	0.0019608	0.089549	https://www.gsea-msigdb.org/gsea/msigdb/human/geneset/GSE5142_CTRL_VS_HTERT_TRANSDUCED_CD8_TCELL_EARLY_PASSAGE_CLONE_DN
GSE19198_CTRL_VS_IL21_TREATED_TCELL_6H_UP	200	186	0.43	1.57	0.042636	0.08966	https://www.gsea-msigdb.org/gsea/msigdb/human/geneset/GSE19198_CTRL_VS_IL21_TREATED_TCELL_6H_UP
GSE23114_WT_VS_SLE2C1_MOUSE_SPLEEN_B1A_BCELL_UP	200	196	0.5	1.57	0.054767	0.089593	https://www.gsea-msigdb.org/gsea/msigdb/human/geneset/GSE23114_WT_VS_SLE2C1_MOUSE_SPLEEN_B1A_BCELL_UP
GSE40274_CTRL_VS_FOXP3_AND_PBX1_TRANSDUCED_ACTIVATED_CD4_TCELL_UP	165	155	0.39	1.57	0.030888	0.089793	https://www.gsea-msigdb.org/gsea/msigdb/human/geneset/GSE40274_CTRL_VS_FOXP3_AND_PBX1_TRANSDUCED_ACTIVATED_CD4_TCELL_UP
GSE21063_CTRL_VS_ANTI_IGM_STIM_BCELL_3H_UP	190	180	0.35	1.57	0.0057915	0.089713	https://www.gsea-msigdb.org/gsea/msigdb/human/geneset/GSE21063_CTRL_VS_ANTI_IGM_STIM_BCELL_3H_UP
GSE14769_UNSTIM_VS_120MIN_LPS_BMDM_DN	200	197	0.42	1.57	0.026369	0.089762	https://www.gsea-msigdb.org/gsea/msigdb/human/geneset/GSE14769_UNSTIM_VS_120MIN_LPS_BMDM_DN
GSE17721_CTRL_VS_POLYIC_6H_BMDC_DN	199	193	0.37	1.57	0.011257	0.089783	https://www.gsea-msigdb.org/gsea/msigdb/human/geneset/GSE17721_CTRL_VS_POLYIC_6H_BMDC_DN
GSE39022_LN_VS_SPLEEN_DC_UP	199	188	0.4	1.57	0.041667	0.090062	https://www.gsea-msigdb.org/gsea/msigdb/human/geneset/GSE39022_LN_VS_SPLEEN_DC_UP
GSE369_SOCS3_KO_VS_WT_LIVER_POST_IL6_INJECTION_DN	200	191	0.38	1.57	0.015656	0.090157	https://www.gsea-msigdb.org/gsea/msigdb/human/geneset/GSE369_SOCS3_KO_VS_WT_LIVER_POST_IL6_INJECTION_DN
GSE7460_CTRL_VS_TGFB_TREATED_ACT_CD8_TCELL_UP	200	191	0.4	1.56	0.02544	0.090619	https://www.gsea-msigdb.org/gsea/msigdb/human/geneset/GSE7460_CTRL_VS_TGFB_TREATED_ACT_CD8_TCELL_UP
GSE43955_10H_VS_30H_ACT_CD4_TCELL_WITH_TGFB_IL6_UP	200	187	0.36	1.56	0.013944	0.090674	https://www.gsea-msigdb.org/gsea/msigdb/human/geneset/GSE43955_10H_VS_30H_ACT_CD4_TCELL_WITH_TGFB_IL6_UP
GSE29164_UNTREATED_VS_CD8_TCELL_TREATED_MELANOMA_DAY7_UP	200	193	0.43	1.56	0.052632	0.090647	https://www.gsea-msigdb.org/gsea/msigdb/human/geneset/GSE29164_UNTREATED_VS_CD8_TCELL_TREATED_MELANOMA_DAY7_UP
GSE13485_DAY1_VS_DAY7_YF17D_VACCINE_PBMC_DN	198	190	0.54	1.56	0.080483	0.091062	https://www.gsea-msigdb.org/gsea/msigdb/human/geneset/GSE13485_DAY1_VS_DAY7_YF17D_VACCINE_PBMC_DN
GSE13306_TREG_VS_TCONV_LAMINA_PROPRIA_UP	200	191	0.34	1.56	0	0.091023	https://www.gsea-msigdb.org/gsea/msigdb/human/geneset/GSE13306_TREG_VS_TCONV_LAMINA_PROPRIA_UP
GSE43955_1H_VS_42H_ACT_CD4_TCELL_DN	200	190	0.34	1.56	0.0056711	0.091394	https://www.gsea-msigdb.org/gsea/msigdb/human/geneset/GSE43955_1H_VS_42H_ACT_CD4_TCELL_DN
GSE37416_0H_VS_48H_F_TULARENSIS_LVS_NEUTROPHIL_DN	195	187	0.42	1.56	0.023857	0.091623	https://www.gsea-msigdb.org/gsea/msigdb/human/geneset/GSE37416_0H_VS_48H_F_TULARENSIS_LVS_NEUTROPHIL_DN
GSE3982_DC_VS_CENT_MEMORY_CD4_TCELL_UP	200	195	0.41	1.56	0.025341	0.091565	https://www.gsea-msigdb.org/gsea/msigdb/human/geneset/GSE3982_DC_VS_CENT_MEMORY_CD4_TCELL_UP
GSE40273_XBP1_KO_VS_WT_TREG_DN	199	194	0.39	1.56	0.014141	0.09157	https://www.gsea-msigdb.org/gsea/msigdb/human/geneset/GSE40273_XBP1_KO_VS_WT_TREG_DN
GSE23505_UNTREATED_VS_4DAY_IL6_IL1_IL23_TREATED_CD4_TCELL_DN	199	185	0.38	1.56	0.028736	0.09151	https://www.gsea-msigdb.org/gsea/msigdb/human/geneset/GSE23505_UNTREATED_VS_4DAY_IL6_IL1_IL23_TREATED_CD4_TCELL_DN
GSE22229_RENAL_TRANSPLANT_IMMUNOSUPP_THERAPY_VS_HEALTHY_PBMC_DN	199	188	0.43	1.56	0.016227	0.091456	https://www.gsea-msigdb.org/gsea/msigdb/human/geneset/GSE22229_RENAL_TRANSPLANT_IMMUNOSUPP_THERAPY_VS_HEALTHY_PBMC_DN
GSE360_DC_VS_MAC_L_DONOVANI_UP	200	193	0.39	1.56	0.021236	0.091781	https://www.gsea-msigdb.org/gsea/msigdb/human/geneset/GSE360_DC_VS_MAC_L_DONOVANI_UP
GSE11973_MIR223_KOVS_WT_BONE_MARROW_NEUTROPHIL_UP	200	190	0.41	1.56	0.023392	0.091702	https://www.gsea-msigdb.org/gsea/msigdb/human/geneset/GSE11973_MIR223_KOVS_WT_BONE_MARROW_NEUTROPHIL_UP
GSE18203_CTRL_VS_INTRATUMORAL_CPG_INJ_MC38_TUMOR_DN	200	188	0.48	1.56	0.074951	0.091639	https://www.gsea-msigdb.org/gsea/msigdb/human/geneset/GSE18203_CTRL_VS_INTRATUMORAL_CPG_INJ_MC38_TUMOR_DN
GSE30971_CTRL_VS_LPS_STIM_MACROPHAGE_WBP7_KO_4H_UP	196	186	0.43	1.56	0.039761	0.091786	https://www.gsea-msigdb.org/gsea/msigdb/human/geneset/GSE30971_CTRL_VS_LPS_STIM_MACROPHAGE_WBP7_KO_4H_UP
GSE17721_PAM3CSK4_VS_CPG_2H_BMDC_DN	200	192	0.35	1.56	0	0.09188	https://www.gsea-msigdb.org/gsea/msigdb/human/geneset/GSE17721_PAM3CSK4_VS_CPG_2H_BMDC_DN
GSE9509_LPS_VS_LPS_AND_IL10_STIM_IL10_KO_MACROPHAGE_30MIN_DN	193	179	0.36	1.56	0.010142	0.091837	https://www.gsea-msigdb.org/gsea/msigdb/human/geneset/GSE9509_LPS_VS_LPS_AND_IL10_STIM_IL10_KO_MACROPHAGE_30MIN_DN
GSE29618_LAIV_VS_TIV_FLU_VACCINE_DAY7_MONOCYTE_DN	195	185	0.39	1.56	0.02544	0.091881	https://www.gsea-msigdb.org/gsea/msigdb/human/geneset/GSE29618_LAIV_VS_TIV_FLU_VACCINE_DAY7_MONOCYTE_DN
GSE15330_HSC_VS_GRANULOCYTE_MONOCYTE_PROGENITOR_IKAROS_KO_UP	200	186	0.4	1.56	0.01378	0.092187	https://www.gsea-msigdb.org/gsea/msigdb/human/geneset/GSE15330_HSC_VS_GRANULOCYTE_MONOCYTE_PROGENITOR_IKAROS_KO_UP
GSE11961_MARGINAL_ZONE_BCELL_VS_PLASMA_CELL_DAY7_DN	199	182	0.38	1.56	0.027668	0.092103	https://www.gsea-msigdb.org/gsea/msigdb/human/geneset/GSE11961_MARGINAL_ZONE_BCELL_VS_PLASMA_CELL_DAY7_DN
GSE37416_12H_VS_24H_F_TULARENSIS_LVS_NEUTROPHIL_UP	199	192	0.43	1.56	0.039841	0.092035	https://www.gsea-msigdb.org/gsea/msigdb/human/geneset/GSE37416_12H_VS_24H_F_TULARENSIS_LVS_NEUTROPHIL_UP
GSE29949_DC_BRAIN_VS_MONOCYTE_BONE_MARROW_DN	198	190	0.32	1.56	0	0.092472	https://www.gsea-msigdb.org/gsea/msigdb/human/geneset/GSE29949_DC_BRAIN_VS_MONOCYTE_BONE_MARROW_DN
GSE17721_POLYIC_VS_GARDIQUIMOD_2H_BMDC_DN	200	186	0.41	1.56	0.01996	0.092607	https://www.gsea-msigdb.org/gsea/msigdb/human/geneset/GSE17721_POLYIC_VS_GARDIQUIMOD_2H_BMDC_DN
GSE37416_0H_VS_6H_F_TULARENSIS_LVS_NEUTROPHIL_DN	198	191	0.46	1.56	0.033932	0.092533	https://www.gsea-msigdb.org/gsea/msigdb/human/geneset/GSE37416_0H_VS_6H_F_TULARENSIS_LVS_NEUTROPHIL_DN
GSE46242_CTRL_VS_EGR2_DELETED_TH1_CD4_TCELL_UP	199	182	0.39	1.56	0.013592	0.092502	https://www.gsea-msigdb.org/gsea/msigdb/human/geneset/GSE46242_CTRL_VS_EGR2_DELETED_TH1_CD4_TCELL_UP
GSE33162_HDAC3_KO_VS_HDAC3_KO_4H_LPS_STIM_MACROPHAGE_DN	200	193	0.34	1.56	0.0018182	0.092681	https://www.gsea-msigdb.org/gsea/msigdb/human/geneset/GSE33162_HDAC3_KO_VS_HDAC3_KO_4H_LPS_STIM_MACROPHAGE_DN
GSE6259_DEC205_POS_DC_VS_CD4_TCELL_UP	199	187	0.35	1.56	0.0039841	0.092641	https://www.gsea-msigdb.org/gsea/msigdb/human/geneset/GSE6259_DEC205_POS_DC_VS_CD4_TCELL_UP
GSE26890_CXCR1_NEG_VS_POS_EFFECTOR_CD8_TCELL_DN	200	185	0.4	1.56	0.013619	0.092851	https://www.gsea-msigdb.org/gsea/msigdb/human/geneset/GSE26890_CXCR1_NEG_VS_POS_EFFECTOR_CD8_TCELL_DN
GSE339_EX_VIVO_VS_IN_CULTURE_CD4CD8DN_DC_DN	200	191	0.4	1.56	0.02554	0.092896	https://www.gsea-msigdb.org/gsea/msigdb/human/geneset/GSE339_EX_VIVO_VS_IN_CULTURE_CD4CD8DN_DC_DN
GSE33162_UNTREATED_VS_4H_LPS_STIM_HDAC3_KO_MACROPHAGE_DN	200	192	0.49	1.56	0.084646	0.093257	https://www.gsea-msigdb.org/gsea/msigdb/human/geneset/GSE33162_UNTREATED_VS_4H_LPS_STIM_HDAC3_KO_MACROPHAGE_DN
GSE7768_OVA_WITH_LPS_VS_OVA_WITH_MPL_IMMUNIZED_MOUSE_WHOLE_SPLEEN_6H_DN	170	161	0.38	1.56	0.011742	0.093189	https://www.gsea-msigdb.org/gsea/msigdb/human/geneset/GSE7768_OVA_WITH_LPS_VS_OVA_WITH_MPL_IMMUNIZED_MOUSE_WHOLE_SPLEEN_6H_DN
GSE3039_NKT_CELL_VS_B1_BCELL_UP	199	178	0.37	1.56	0.015123	0.093147	https://www.gsea-msigdb.org/gsea/msigdb/human/geneset/GSE3039_NKT_CELL_VS_B1_BCELL_UP
GSE39556_UNTREATED_VS_3H_POLYIC_INJ_MOUSE_NK_CELL_UP	199	193	0.43	1.56	0.040486	0.093161	https://www.gsea-msigdb.org/gsea/msigdb/human/geneset/GSE39556_UNTREATED_VS_3H_POLYIC_INJ_MOUSE_NK_CELL_UP
GSE24142_ADULT_VS_FETAL_DN3_THYMOCYTE_DN	200	189	0.34	1.56	0.0019763	0.093078	https://www.gsea-msigdb.org/gsea/msigdb/human/geneset/GSE24142_ADULT_VS_FETAL_DN3_THYMOCYTE_DN
GSE15735_2H_VS_12H_HDAC_INHIBITOR_TREATED_CD4_TCELL_DN	200	195	0.41	1.56	0.036965	0.093127	https://www.gsea-msigdb.org/gsea/msigdb/human/geneset/GSE15735_2H_VS_12H_HDAC_INHIBITOR_TREATED_CD4_TCELL_DN
GSE17721_LPS_VS_CPG_16H_BMDC_DN	200	188	0.39	1.56	0.025391	0.093182	https://www.gsea-msigdb.org/gsea/msigdb/human/geneset/GSE17721_LPS_VS_CPG_16H_BMDC_DN
GSE11961_FOLLICULAR_BCELL_VS_GERMINAL_CENTER_BCELL_DAY7_DN	200	185	0.35	1.56	0.011385	0.093352	https://www.gsea-msigdb.org/gsea/msigdb/human/geneset/GSE11961_FOLLICULAR_BCELL_VS_GERMINAL_CENTER_BCELL_DAY7_DN
GSE1925_CTRL_VS_IFNG_PRIMED_MACROPHAGE_UP	200	191	0.38	1.56	0.017751	0.093861	https://www.gsea-msigdb.org/gsea/msigdb/human/geneset/GSE1925_CTRL_VS_IFNG_PRIMED_MACROPHAGE_UP
GSE17721_LPS_VS_GARDIQUIMOD_12H_BMDC_DN	199	183	0.44	1.56	0.024194	0.093775	https://www.gsea-msigdb.org/gsea/msigdb/human/geneset/GSE17721_LPS_VS_GARDIQUIMOD_12H_BMDC_DN
GSE17721_LPS_VS_GARDIQUIMOD_8H_BMDC_UP	200	188	0.4	1.56	0.00818	0.093706	https://www.gsea-msigdb.org/gsea/msigdb/human/geneset/GSE17721_LPS_VS_GARDIQUIMOD_8H_BMDC_UP
GSE43955_TH0_VS_TGFB_IL6_IL23_TH17_ACT_CD4_TCELL_52H_DN	200	194	0.36	1.56	0.0019763	0.093664	https://www.gsea-msigdb.org/gsea/msigdb/human/geneset/GSE43955_TH0_VS_TGFB_IL6_IL23_TH17_ACT_CD4_TCELL_52H_DN
GSE28783_ANTI_MIR33_VS_UNTREATED_ATHEROSCLEROSIS_MACROPHAGE_UP	199	190	0.37	1.56	0.014625	0.093739	https://www.gsea-msigdb.org/gsea/msigdb/human/geneset/GSE28783_ANTI_MIR33_VS_UNTREATED_ATHEROSCLEROSIS_MACROPHAGE_UP
GSE5099_DAY3_VS_DAY7_MCSF_TREATED_MACROPHAGE_UP	192	184	0.4	1.56	0.013514	0.093776	https://www.gsea-msigdb.org/gsea/msigdb/human/geneset/GSE5099_DAY3_VS_DAY7_MCSF_TREATED_MACROPHAGE_UP
GSE17580_TREG_VS_TEFF_S_MANSONI_INF_UP	200	191	0.39	1.56	0.012	0.093875	https://www.gsea-msigdb.org/gsea/msigdb/human/geneset/GSE17580_TREG_VS_TEFF_S_MANSONI_INF_UP
GSE36888_STAT5_AB_KNOCKIN_VS_WT_TCELL_IL2_TREATED_17H_DN	197	185	0.42	1.56	0.029821	0.093834	https://www.gsea-msigdb.org/gsea/msigdb/human/geneset/GSE36888_STAT5_AB_KNOCKIN_VS_WT_TCELL_IL2_TREATED_17H_DN
GSE360_CTRL_VS_M_TUBERCULOSIS_MAC_DN	198	187	0.34	1.56	0.003876	0.093782	https://www.gsea-msigdb.org/gsea/msigdb/human/geneset/GSE360_CTRL_VS_M_TUBERCULOSIS_MAC_DN
GSE13547_WT_VS_ZFX_KO_BCELL_UP	163	159	0.36	1.56	0.0057361	0.093916	https://www.gsea-msigdb.org/gsea/msigdb/human/geneset/GSE13547_WT_VS_ZFX_KO_BCELL_UP
GSE6259_FLT3L_INDUCED_VS_WT_SPLENIC_DC_33D1_POS_DN	163	150	0.35	1.56	0.0038314	0.093934	https://www.gsea-msigdb.org/gsea/msigdb/human/geneset/GSE6259_FLT3L_INDUCED_VS_WT_SPLENIC_DC_33D1_POS_DN
GSE3720_VD1_VS_VD2_GAMMADELTA_TCELL_DN	200	187	0.37	1.56	0.01378	0.093967	https://www.gsea-msigdb.org/gsea/msigdb/human/geneset/GSE3720_VD1_VS_VD2_GAMMADELTA_TCELL_DN
GSE10325_BCELL_VS_MYELOID_UP	197	184	0.45	1.56	0.070866	0.093945	https://www.gsea-msigdb.org/gsea/msigdb/human/geneset/GSE10325_BCELL_VS_MYELOID_UP
GSE27670_CTRL_VS_BLIMP1_TRANSDUCED_GC_BCELL_UP	200	188	0.35	1.56	0.003663	0.093906	https://www.gsea-msigdb.org/gsea/msigdb/human/geneset/GSE27670_CTRL_VS_BLIMP1_TRANSDUCED_GC_BCELL_UP
GSE1432_6H_VS_24H_IFNG_MICROGLIA_UP	200	186	0.44	1.55	0.035644	0.093902	https://www.gsea-msigdb.org/gsea/msigdb/human/geneset/GSE1432_6H_VS_24H_IFNG_MICROGLIA_UP
GSE36888_STAT5_AB_KNOCKIN_VS_WT_TCELL_IL2_TREATED_2H_DN	198	190	0.36	1.55	0.017375	0.093949	https://www.gsea-msigdb.org/gsea/msigdb/human/geneset/GSE36888_STAT5_AB_KNOCKIN_VS_WT_TCELL_IL2_TREATED_2H_DN
GSE40274_FOXP3_VS_FOXP3_AND_XBP1_TRANSDUCED_ACTIVATED_CD4_TCELL_DN	158	151	0.36	1.55	0	0.094054	https://www.gsea-msigdb.org/gsea/msigdb/human/geneset/GSE40274_FOXP3_VS_FOXP3_AND_XBP1_TRANSDUCED_ACTIVATED_CD4_TCELL_DN
GSE3982_DC_VS_EFF_MEMORY_CD4_TCELL_UP	199	194	0.41	1.55	0.042636	0.094156	https://www.gsea-msigdb.org/gsea/msigdb/human/geneset/GSE3982_DC_VS_EFF_MEMORY_CD4_TCELL_UP
GSE3982_BCELL_VS_TH1_DN	198	187	0.42	1.55	0.06383	0.09415	https://www.gsea-msigdb.org/gsea/msigdb/human/geneset/GSE3982_BCELL_VS_TH1_DN
GSE7768_OVA_ALONE_VS_OVA_WITH_LPS_IMMUNIZED_MOUSE_WHOLE_SPLEEN_6H_DN	170	162	0.41	1.55	0.044574	0.094061	https://www.gsea-msigdb.org/gsea/msigdb/human/geneset/GSE7768_OVA_ALONE_VS_OVA_WITH_LPS_IMMUNIZED_MOUSE_WHOLE_SPLEEN_6H_DN
GSE25088_CTRL_VS_IL4_AND_ROSIGLITAZONE_STIM_STAT6_KO_MACROPHAGE_DN	196	172	0.39	1.55	0.022814	0.093978	https://www.gsea-msigdb.org/gsea/msigdb/human/geneset/GSE25088_CTRL_VS_IL4_AND_ROSIGLITAZONE_STIM_STAT6_KO_MACROPHAGE_DN
GSE32901_NAIVE_VS_TH17_NEG_CD4_TCELL_UP	172	163	0.47	1.55	0.056795	0.094128	https://www.gsea-msigdb.org/gsea/msigdb/human/geneset/GSE32901_NAIVE_VS_TH17_NEG_CD4_TCELL_UP
GSE43863_TH1_VS_TFH_MEMORY_CD4_TCELL_UP	200	188	0.44	1.55	0.060606	0.094124	https://www.gsea-msigdb.org/gsea/msigdb/human/geneset/GSE43863_TH1_VS_TFH_MEMORY_CD4_TCELL_UP
GSE32533_MIR17_KO_VS_MIR17_OVEREXPRESS_ACT_CD4_TCELL_DN	200	186	0.34	1.55	0.0055351	0.094191	https://www.gsea-msigdb.org/gsea/msigdb/human/geneset/GSE32533_MIR17_KO_VS_MIR17_OVEREXPRESS_ACT_CD4_TCELL_DN
GSE13306_LAMINA_PROPRIA_VS_SPLEEN_TREG_DN	200	189	0.35	1.55	0.0094877	0.094157	https://www.gsea-msigdb.org/gsea/msigdb/human/geneset/GSE13306_LAMINA_PROPRIA_VS_SPLEEN_TREG_DN
GSE13411_NAIVE_VS_IGM_MEMORY_BCELL_DN	198	187	0.42	1.55	0.026104	0.094071	https://www.gsea-msigdb.org/gsea/msigdb/human/geneset/GSE13411_NAIVE_VS_IGM_MEMORY_BCELL_DN
GSE20366_EX_VIVO_VS_HOMEOSTATIC_CONVERSION_NAIVE_CD4_TCELL_DN	200	189	0.33	1.55	0.002004	0.094094	https://www.gsea-msigdb.org/gsea/msigdb/human/geneset/GSE20366_EX_VIVO_VS_HOMEOSTATIC_CONVERSION_NAIVE_CD4_TCELL_DN
GSE42088_UNINF_VS_LEISHMANIA_INF_DC_4H_UP	200	194	0.43	1.55	0.04065	0.094249	https://www.gsea-msigdb.org/gsea/msigdb/human/geneset/GSE42088_UNINF_VS_LEISHMANIA_INF_DC_4H_UP
GSE22886_CD8_TCELL_VS_BCELL_NAIVE_DN	198	190	0.37	1.55	0.039773	0.094173	https://www.gsea-msigdb.org/gsea/msigdb/human/geneset/GSE22886_CD8_TCELL_VS_BCELL_NAIVE_DN
GSE37563_WT_VS_CTLA4_KO_CD4_TCELL_D4_POST_IMMUNIZATION_DN	185	176	0.4	1.55	0.032787	0.094166	https://www.gsea-msigdb.org/gsea/msigdb/human/geneset/GSE37563_WT_VS_CTLA4_KO_CD4_TCELL_D4_POST_IMMUNIZATION_DN
GSE10239_NAIVE_VS_KLRG1HIGH_EFF_CD8_TCELL_DN	200	189	0.49	1.55	0.095238	0.09439	https://www.gsea-msigdb.org/gsea/msigdb/human/geneset/GSE10239_NAIVE_VS_KLRG1HIGH_EFF_CD8_TCELL_DN
GSE29949_CD8_POS_DC_SPLEEN_VS_MONOCYTE_BONE_MARROW_UP	197	190	0.34	1.55	0.0056926	0.094333	https://www.gsea-msigdb.org/gsea/msigdb/human/geneset/GSE29949_CD8_POS_DC_SPLEEN_VS_MONOCYTE_BONE_MARROW_UP
GSE36888_STAT5_AB_KNOCKIN_VS_WT_TCELL_IL2_TREATED_6H_UP	199	181	0.37	1.55	0.0058939	0.094392	https://www.gsea-msigdb.org/gsea/msigdb/human/geneset/GSE36888_STAT5_AB_KNOCKIN_VS_WT_TCELL_IL2_TREATED_6H_UP
GSE12392_WT_VS_IFNB_KO_CD8A_POS_SPLEEN_DC_DN	200	183	0.33	1.55	0.0093284	0.09473	https://www.gsea-msigdb.org/gsea/msigdb/human/geneset/GSE12392_WT_VS_IFNB_KO_CD8A_POS_SPLEEN_DC_DN
GSE9037_CTRL_VS_LPS_4H_STIM_BMDM_DN	200	182	0.4	1.55	0.01222	0.094644	https://www.gsea-msigdb.org/gsea/msigdb/human/geneset/GSE9037_CTRL_VS_LPS_4H_STIM_BMDM_DN
GSE4748_CTRL_VS_LPS_STIM_DC_3H_UP	200	189	0.41	1.55	0.029762	0.094648	https://www.gsea-msigdb.org/gsea/msigdb/human/geneset/GSE4748_CTRL_VS_LPS_STIM_DC_3H_UP
GSE22589_HIV_VS_HIV_AND_SIV_INFECTED_DC_UP	199	182	0.38	1.55	0.015414	0.094636	https://www.gsea-msigdb.org/gsea/msigdb/human/geneset/GSE22589_HIV_VS_HIV_AND_SIV_INFECTED_DC_UP
GSE40274_CTRL_VS_HELIOS_TRANSDUCED_ACTIVATED_CD4_TCELL_UP	166	159	0.36	1.55	0.015474	0.094865	https://www.gsea-msigdb.org/gsea/msigdb/human/geneset/GSE40274_CTRL_VS_HELIOS_TRANSDUCED_ACTIVATED_CD4_TCELL_UP
GSE22196_HEALTHY_VS_OBESE_MOUSE_SKIN_GAMMADELTA_TCELL_UP	199	188	0.46	1.55	0.067194	0.094942	https://www.gsea-msigdb.org/gsea/msigdb/human/geneset/GSE22196_HEALTHY_VS_OBESE_MOUSE_SKIN_GAMMADELTA_TCELL_UP
GSE17721_LPS_VS_GARDIQUIMOD_2H_BMDC_UP	200	188	0.39	1.55	0.019724	0.094856	https://www.gsea-msigdb.org/gsea/msigdb/human/geneset/GSE17721_LPS_VS_GARDIQUIMOD_2H_BMDC_UP
GSE17721_0.5H_VS_24H_CPG_BMDC_UP	200	191	0.38	1.55	0.026769	0.095098	https://www.gsea-msigdb.org/gsea/msigdb/human/geneset/GSE17721_0.5H_VS_24H_CPG_BMDC_UP
GSE14769_UNSTIM_VS_80MIN_LPS_BMDM_DN	199	189	0.49	1.55	0.051587	0.095069	https://www.gsea-msigdb.org/gsea/msigdb/human/geneset/GSE14769_UNSTIM_VS_80MIN_LPS_BMDM_DN
GSE17186_BLOOD_VS_CORD_BLOOD_NAIVE_BCELL_UP	200	185	0.42	1.55	0.018109	0.095033	https://www.gsea-msigdb.org/gsea/msigdb/human/geneset/GSE17186_BLOOD_VS_CORD_BLOOD_NAIVE_BCELL_UP
GSE20754_WT_VS_TCF1_KO_MEMORY_CD8_TCELL_UP	200	188	0.4	1.55	0.011811	0.095088	https://www.gsea-msigdb.org/gsea/msigdb/human/geneset/GSE20754_WT_VS_TCF1_KO_MEMORY_CD8_TCELL_UP
GSE6269_HEALTHY_VS_E_COLI_INF_PBMC_DN	172	156	0.33	1.55	0.011364	0.095402	https://www.gsea-msigdb.org/gsea/msigdb/human/geneset/GSE6269_HEALTHY_VS_E_COLI_INF_PBMC_DN
GSE26488_CTRL_VS_PEPTIDE_INJECTION_OT2_THYMOCYTE_DN	183	176	0.4	1.55	0.045187	0.09537	https://www.gsea-msigdb.org/gsea/msigdb/human/geneset/GSE26488_CTRL_VS_PEPTIDE_INJECTION_OT2_THYMOCYTE_DN
GSE6259_FLT3L_INDUCED_DEC205_POS_DC_VS_BCELL_DN	170	152	0.44	1.55	0.045908	0.095298	https://www.gsea-msigdb.org/gsea/msigdb/human/geneset/GSE6259_FLT3L_INDUCED_DEC205_POS_DC_VS_BCELL_DN
GSE9946_IMMATURE_VS_PROSTAGLANDINE2_TREATED_MATURE_DC_DN	147	133	0.34	1.55	0.0037523	0.095225	https://www.gsea-msigdb.org/gsea/msigdb/human/geneset/GSE9946_IMMATURE_VS_PROSTAGLANDINE2_TREATED_MATURE_DC_DN
GSE37301_CD4_TCELL_VS_RAG2_KO_NK_CELL_UP	163	153	0.33	1.55	0.0038911	0.095255	https://www.gsea-msigdb.org/gsea/msigdb/human/geneset/GSE37301_CD4_TCELL_VS_RAG2_KO_NK_CELL_UP
GSE21670_UNTREATED_VS_IL6_TREATED_STAT3_KO_CD4_TCELL_UP	200	186	0.4	1.55	0.06142	0.095454	https://www.gsea-msigdb.org/gsea/msigdb/human/geneset/GSE21670_UNTREATED_VS_IL6_TREATED_STAT3_KO_CD4_TCELL_UP
GSE34205_RSV_VS_FLU_INF_INFANT_PBMC_DN	195	186	0.44	1.55	0.064639	0.09562	https://www.gsea-msigdb.org/gsea/msigdb/human/geneset/GSE34205_RSV_VS_FLU_INF_INFANT_PBMC_DN
GSE24142_DN2_VS_DN3_THYMOCYTE_ADULT_UP	199	183	0.35	1.55	0.022901	0.095646	https://www.gsea-msigdb.org/gsea/msigdb/human/geneset/GSE24142_DN2_VS_DN3_THYMOCYTE_ADULT_UP
GSE20715_0H_VS_24H_OZONE_TLR4_KO_LUNG_UP	199	181	0.37	1.55	0.019157	0.095596	https://www.gsea-msigdb.org/gsea/msigdb/human/geneset/GSE20715_0H_VS_24H_OZONE_TLR4_KO_LUNG_UP
GSE43955_1H_VS_60H_ACT_CD4_TCELL_WITH_TGFB_IL6_UP	200	189	0.4	1.55	0.023121	0.09555	https://www.gsea-msigdb.org/gsea/msigdb/human/geneset/GSE43955_1H_VS_60H_ACT_CD4_TCELL_WITH_TGFB_IL6_UP
GSE46606_UNSTIM_VS_CD40L_IL2_IL5_DAY1_STIMULATED_BCELL_DN	200	184	0.46	1.55	0.075248	0.095699	https://www.gsea-msigdb.org/gsea/msigdb/human/geneset/GSE46606_UNSTIM_VS_CD40L_IL2_IL5_DAY1_STIMULATED_BCELL_DN
GSE22886_CD8_TCELL_VS_BCELL_NAIVE_UP	199	186	0.47	1.55	0.066798	0.095619	https://www.gsea-msigdb.org/gsea/msigdb/human/geneset/GSE22886_CD8_TCELL_VS_BCELL_NAIVE_UP
GSE42724_MEMORY_BCELL_VS_PLASMABLAST_UP	199	193	0.41	1.55	0.017964	0.09567	https://www.gsea-msigdb.org/gsea/msigdb/human/geneset/GSE42724_MEMORY_BCELL_VS_PLASMABLAST_UP
GSE3982_MAC_VS_TH1_DN	199	187	0.41	1.55	0.050403	0.095776	https://www.gsea-msigdb.org/gsea/msigdb/human/geneset/GSE3982_MAC_VS_TH1_DN
GSE24142_EARLY_THYMIC_PROGENITOR_VS_DN2_THYMOCYTE_DN	199	184	0.34	1.55	0.0019685	0.095719	https://www.gsea-msigdb.org/gsea/msigdb/human/geneset/GSE24142_EARLY_THYMIC_PROGENITOR_VS_DN2_THYMOCYTE_DN
GSE360_L_MAJOR_VS_B_MALAYI_LOW_DOSE_MAC_UP	197	187	0.36	1.55	0.0038388	0.095803	https://www.gsea-msigdb.org/gsea/msigdb/human/geneset/GSE360_L_MAJOR_VS_B_MALAYI_LOW_DOSE_MAC_UP
GSE40225_WT_VS_RIP_B7X_DIABETIC_MOUSE_PANCREATIC_CD8_TCELL_DN	200	176	0.45	1.55	0.054326	0.09579	https://www.gsea-msigdb.org/gsea/msigdb/human/geneset/GSE40225_WT_VS_RIP_B7X_DIABETIC_MOUSE_PANCREATIC_CD8_TCELL_DN
GSE17721_LPS_VS_CPG_12H_BMDC_UP	199	185	0.39	1.55	0.0099206	0.095815	https://www.gsea-msigdb.org/gsea/msigdb/human/geneset/GSE17721_LPS_VS_CPG_12H_BMDC_UP
GSE37301_LYMPHOID_PRIMED_MPP_VS_PRO_BCELL_DN	196	183	0.31	1.55	0.0019048	0.095757	https://www.gsea-msigdb.org/gsea/msigdb/human/geneset/GSE37301_LYMPHOID_PRIMED_MPP_VS_PRO_BCELL_DN
GSE1460_DP_THYMOCYTE_VS_NAIVE_CD4_TCELL_CORD_BLOOD_DN	199	186	0.35	1.55	0.0056497	0.095797	https://www.gsea-msigdb.org/gsea/msigdb/human/geneset/GSE1460_DP_THYMOCYTE_VS_NAIVE_CD4_TCELL_CORD_BLOOD_DN
GSE7348_UNSTIM_VS_TOLERIZED_AND_LPS_STIM_MACROPHAGE_DN	161	151	0.4	1.55	0.042969	0.095758	https://www.gsea-msigdb.org/gsea/msigdb/human/geneset/GSE7348_UNSTIM_VS_TOLERIZED_AND_LPS_STIM_MACROPHAGE_DN
GSE46606_IRF4HIGH_VS_IRF4MID_CD40L_IL2_IL5_DAY1_STIMULATED_BCELL_DN	200	183	0.33	1.55	0.0018622	0.09578	https://www.gsea-msigdb.org/gsea/msigdb/human/geneset/GSE46606_IRF4HIGH_VS_IRF4MID_CD40L_IL2_IL5_DAY1_STIMULATED_BCELL_DN
GSE44732_UNSTIM_VS_IL27_STIM_IMATURE_DC_UP	200	187	0.4	1.55	0.024762	0.095866	https://www.gsea-msigdb.org/gsea/msigdb/human/geneset/GSE44732_UNSTIM_VS_IL27_STIM_IMATURE_DC_UP
GSE22045_TREG_VS_TCONV_UP	189	176	0.36	1.55	0.013672	0.09595	https://www.gsea-msigdb.org/gsea/msigdb/human/geneset/GSE22045_TREG_VS_TCONV_UP
GSE6259_FLT3L_INDUCED_33D1_POS_DC_VS_CD4_TCELL_UP	171	167	0.4	1.55	0.055877	0.095911	https://www.gsea-msigdb.org/gsea/msigdb/human/geneset/GSE6259_FLT3L_INDUCED_33D1_POS_DC_VS_CD4_TCELL_UP
GSE37416_0H_VS_3H_F_TULARENSIS_LVS_NEUTROPHIL_DN	197	192	0.44	1.55	0.053571	0.095903	https://www.gsea-msigdb.org/gsea/msigdb/human/geneset/GSE37416_0H_VS_3H_F_TULARENSIS_LVS_NEUTROPHIL_DN
GSE41867_NAIVE_VS_DAY8_LCMV_CLONE13_EFFECTOR_CD8_TCELL_UP	200	190	0.38	1.55	0.008	0.095903	https://www.gsea-msigdb.org/gsea/msigdb/human/geneset/GSE41867_NAIVE_VS_DAY8_LCMV_CLONE13_EFFECTOR_CD8_TCELL_UP
GSE24142_EARLY_THYMIC_PROGENITOR_VS_DN3_THYMOCYTE_ADULT_DN	200	186	0.38	1.55	0.0097847	0.095823	https://www.gsea-msigdb.org/gsea/msigdb/human/geneset/GSE24142_EARLY_THYMIC_PROGENITOR_VS_DN3_THYMOCYTE_ADULT_DN
GSE21546_ELK1_KO_VS_SAP1A_KO_AND_ELK1_KO_DP_THYMOCYTES_DN	197	188	0.48	1.55	0.080483	0.095986	https://www.gsea-msigdb.org/gsea/msigdb/human/geneset/GSE21546_ELK1_KO_VS_SAP1A_KO_AND_ELK1_KO_DP_THYMOCYTES_DN
GSE7509_UNSTIM_VS_IFNA_STIM_IMMATURE_DC_UP	181	169	0.41	1.55	0.067194	0.095959	https://www.gsea-msigdb.org/gsea/msigdb/human/geneset/GSE7509_UNSTIM_VS_IFNA_STIM_IMMATURE_DC_UP
GSE2770_TGFB_AND_IL4_VS_IL4_TREATED_ACT_CD4_TCELL_48H_UP	198	188	0.43	1.55	0.053892	0.095904	https://www.gsea-msigdb.org/gsea/msigdb/human/geneset/GSE2770_TGFB_AND_IL4_VS_IL4_TREATED_ACT_CD4_TCELL_48H_UP
GSE15659_NAIVE_CD4_TCELL_VS_NONSUPPRESSIVE_TCELL_DN	200	186	0.33	1.55	0.0057692	0.096077	https://www.gsea-msigdb.org/gsea/msigdb/human/geneset/GSE15659_NAIVE_CD4_TCELL_VS_NONSUPPRESSIVE_TCELL_DN
GSE43955_TH0_VS_TGFB_IL6_TH17_ACT_CD4_TCELL_30H_UP	200	194	0.34	1.55	0.0038911	0.096028	https://www.gsea-msigdb.org/gsea/msigdb/human/geneset/GSE43955_TH0_VS_TGFB_IL6_TH17_ACT_CD4_TCELL_30H_UP
GSE13547_CTRL_VS_ANTI_IGM_STIM_BCELL_2H_UP	183	169	0.49	1.55	0.1087	0.096261	https://www.gsea-msigdb.org/gsea/msigdb/human/geneset/GSE13547_CTRL_VS_ANTI_IGM_STIM_BCELL_2H_UP
GSE1925_CTRL_VS_24H_IFNG_STIM_MACROPHAGE_DN	195	185	0.37	1.54	0.00611	0.096936	https://www.gsea-msigdb.org/gsea/msigdb/human/geneset/GSE1925_CTRL_VS_24H_IFNG_STIM_MACROPHAGE_DN
GSE17721_POLYIC_VS_CPG_2H_BMDC_DN	200	188	0.37	1.54	0.0059406	0.097121	https://www.gsea-msigdb.org/gsea/msigdb/human/geneset/GSE17721_POLYIC_VS_CPG_2H_BMDC_DN
GSE32164_RESTING_DIFFERENTIATED_VS_ALTERNATIVELY_ACT_M2_MACROPHAGE_DN	200	192	0.41	1.54	0.027668	0.097334	https://www.gsea-msigdb.org/gsea/msigdb/human/geneset/GSE32164_RESTING_DIFFERENTIATED_VS_ALTERNATIVELY_ACT_M2_MACROPHAGE_DN
GSE39152_SPLEEN_CD103_NEG_VS_BRAIN_CD103_POS_MEMORY_CD8_TCELL_UP	200	192	0.37	1.54	0.019048	0.097269	https://www.gsea-msigdb.org/gsea/msigdb/human/geneset/GSE39152_SPLEEN_CD103_NEG_VS_BRAIN_CD103_POS_MEMORY_CD8_TCELL_UP
GSE24634_NAIVE_CD4_TCELL_VS_DAY3_IL4_CONV_TREG_DN	200	190	0.52	1.54	0.093069	0.0972	https://www.gsea-msigdb.org/gsea/msigdb/human/geneset/GSE24634_NAIVE_CD4_TCELL_VS_DAY3_IL4_CONV_TREG_DN
GSE11961_FOLLICULAR_BCELL_VS_MEMORY_BCELL_DAY40_DN	200	186	0.39	1.54	0.019881	0.097397	https://www.gsea-msigdb.org/gsea/msigdb/human/geneset/GSE11961_FOLLICULAR_BCELL_VS_MEMORY_BCELL_DAY40_DN
GSE19923_WT_VS_HEB_KO_DP_THYMOCYTE_UP	200	187	0.34	1.54	0.0095238	0.097377	https://www.gsea-msigdb.org/gsea/msigdb/human/geneset/GSE19923_WT_VS_HEB_KO_DP_THYMOCYTE_UP
GSE23114_PERITONEAL_CAVITY_B1A_BCELL_VS_SPLEEN_BCELL_DN	200	190	0.52	1.54	0.060852	0.097351	https://www.gsea-msigdb.org/gsea/msigdb/human/geneset/GSE23114_PERITONEAL_CAVITY_B1A_BCELL_VS_SPLEEN_BCELL_DN
GSE27241_WT_VS_RORGT_KO_TH17_POLARIZED_CD4_TCELL_TREATED_WITH_DIGOXIN_DN	178	167	0.35	1.54	0.013258	0.097464	https://www.gsea-msigdb.org/gsea/msigdb/human/geneset/GSE27241_WT_VS_RORGT_KO_TH17_POLARIZED_CD4_TCELL_TREATED_WITH_DIGOXIN_DN
GSE12845_IGD_POS_BLOOD_VS_PRE_GC_TONSIL_BCELL_DN	200	192	0.51	1.54	0.10059	0.097794	https://www.gsea-msigdb.org/gsea/msigdb/human/geneset/GSE12845_IGD_POS_BLOOD_VS_PRE_GC_TONSIL_BCELL_DN
GSE43955_1H_VS_20H_ACT_CD4_TCELL_DN	200	192	0.35	1.54	0.00409	0.097748	https://www.gsea-msigdb.org/gsea/msigdb/human/geneset/GSE43955_1H_VS_20H_ACT_CD4_TCELL_DN
GSE360_HIGH_VS_LOW_DOSE_B_MALAYI_DC_DN	200	195	0.35	1.54	0.0019231	0.097878	https://www.gsea-msigdb.org/gsea/msigdb/human/geneset/GSE360_HIGH_VS_LOW_DOSE_B_MALAYI_DC_DN
GSE22935_UNSTIM_VS_24H_MBOVIS_BCG_STIM_MYD88_KO_MACROPHAGE_DN	200	183	0.37	1.54	0.016636	0.097827	https://www.gsea-msigdb.org/gsea/msigdb/human/geneset/GSE22935_UNSTIM_VS_24H_MBOVIS_BCG_STIM_MYD88_KO_MACROPHAGE_DN
GSE22229_RENAL_TRANSPLANT_IMMUNOSUPP_THERAPY_VS_HEALTHY_PBMC_UP	199	188	0.45	1.54	0.039761	0.097907	https://www.gsea-msigdb.org/gsea/msigdb/human/geneset/GSE22229_RENAL_TRANSPLANT_IMMUNOSUPP_THERAPY_VS_HEALTHY_PBMC_UP
GSE14350_IL2RB_KO_VS_WT_TREG_DN	200	191	0.36	1.54	0.012048	0.097858	https://www.gsea-msigdb.org/gsea/msigdb/human/geneset/GSE14350_IL2RB_KO_VS_WT_TREG_DN
GSE9988_LPS_VS_VEHICLE_TREATED_MONOCYTE_DN	198	192	0.45	1.54	0.07451	0.098056	https://www.gsea-msigdb.org/gsea/msigdb/human/geneset/GSE9988_LPS_VS_VEHICLE_TREATED_MONOCYTE_DN
GSE3982_EFF_MEMORY_CD4_TCELL_VS_TH1_DN	199	186	0.47	1.54	0.085317	0.0981	https://www.gsea-msigdb.org/gsea/msigdb/human/geneset/GSE3982_EFF_MEMORY_CD4_TCELL_VS_TH1_DN
GSE24574_BCL6_HIGH_TFH_VS_TCONV_CD4_TCELL_UP	198	187	0.36	1.54	0.020161	0.098052	https://www.gsea-msigdb.org/gsea/msigdb/human/geneset/GSE24574_BCL6_HIGH_TFH_VS_TCONV_CD4_TCELL_UP
GSE4748_CYANOBACTERIUM_LPSLIKE_VS_LPS_AND_CYANOBACTERIUM_LPSLIKE_STIM_DC_3H_UP	194	178	0.42	1.54	0.044177	0.098066	https://www.gsea-msigdb.org/gsea/msigdb/human/geneset/GSE4748_CYANOBACTERIUM_LPSLIKE_VS_LPS_AND_CYANOBACTERIUM_LPSLIKE_STIM_DC_3H_UP
GSE37301_HEMATOPOIETIC_STEM_CELL_VS_GRAN_MONO_PROGENITOR_UP	162	149	0.35	1.54	0	0.098282	https://www.gsea-msigdb.org/gsea/msigdb/human/geneset/GSE37301_HEMATOPOIETIC_STEM_CELL_VS_GRAN_MONO_PROGENITOR_UP
GSE16697_CD4_TCELL_VS_TFH_CD4_TCELL_DN	200	183	0.34	1.54	0.012072	0.0984	https://www.gsea-msigdb.org/gsea/msigdb/human/geneset/GSE16697_CD4_TCELL_VS_TFH_CD4_TCELL_DN
GSE11864_CSF1_IFNG_VS_CSF1_PAM3CYS_IN_MAC_DN	196	185	0.38	1.54	0.029644	0.09843	https://www.gsea-msigdb.org/gsea/msigdb/human/geneset/GSE11864_CSF1_IFNG_VS_CSF1_PAM3CYS_IN_MAC_DN
GSE20727_CTRL_VS_DNFB_ALLERGEN_TREATED_DC_UP	200	189	0.38	1.54	0.034274	0.098414	https://www.gsea-msigdb.org/gsea/msigdb/human/geneset/GSE20727_CTRL_VS_DNFB_ALLERGEN_TREATED_DC_UP
GSE3982_DC_VS_BCELL_UP	200	194	0.38	1.54	0.017544	0.098479	https://www.gsea-msigdb.org/gsea/msigdb/human/geneset/GSE3982_DC_VS_BCELL_UP
GSE40274_CTRL_VS_IRF4_TRANSDUCED_ACTIVATED_CD4_TCELL_UP	162	153	0.41	1.54	0.03861	0.098768	https://www.gsea-msigdb.org/gsea/msigdb/human/geneset/GSE40274_CTRL_VS_IRF4_TRANSDUCED_ACTIVATED_CD4_TCELL_UP
GSE26488_CTRL_VS_PEPTIDE_INJECTION_HDAC7_DELTAP_TG_OT2_THYMOCYTE_DN	200	185	0.4	1.54	0.036122	0.098686	https://www.gsea-msigdb.org/gsea/msigdb/human/geneset/GSE26488_CTRL_VS_PEPTIDE_INJECTION_HDAC7_DELTAP_TG_OT2_THYMOCYTE_DN
GSE14415_INDUCED_TREG_VS_FAILED_INDUCED_TREG_UP	185	174	0.5	1.54	0.12281	0.098701	https://www.gsea-msigdb.org/gsea/msigdb/human/geneset/GSE14415_INDUCED_TREG_VS_FAILED_INDUCED_TREG_UP
GSE7460_TREG_VS_TCONV_ACT_UP	200	186	0.4	1.54	0.02994	0.098869	https://www.gsea-msigdb.org/gsea/msigdb/human/geneset/GSE7460_TREG_VS_TCONV_ACT_UP
GSE3982_MEMORY_CD4_TCELL_VS_TH1_DN	199	189	0.53	1.54	0.11765	0.098857	https://www.gsea-msigdb.org/gsea/msigdb/human/geneset/GSE3982_MEMORY_CD4_TCELL_VS_TH1_DN
GSE360_CTRL_VS_B_MALAYI_LOW_DOSE_DC_DN	200	190	0.35	1.54	0.01711	0.098858	https://www.gsea-msigdb.org/gsea/msigdb/human/geneset/GSE360_CTRL_VS_B_MALAYI_LOW_DOSE_DC_DN
GSE15330_LYMPHOID_MULTIPOTENT_VS_PRO_BCELL_UP	200	189	0.35	1.54	0.0077071	0.09905	https://www.gsea-msigdb.org/gsea/msigdb/human/geneset/GSE15330_LYMPHOID_MULTIPOTENT_VS_PRO_BCELL_UP
GSE17721_CTRL_VS_GARDIQUIMOD_24H_BMDC_DN	199	186	0.44	1.54	0.036437	0.099371	https://www.gsea-msigdb.org/gsea/msigdb/human/geneset/GSE17721_CTRL_VS_GARDIQUIMOD_24H_BMDC_DN
GSE3982_MAC_VS_EFF_MEMORY_CD4_TCELL_DN	196	189	0.37	1.54	0.011299	0.099492	https://www.gsea-msigdb.org/gsea/msigdb/human/geneset/GSE3982_MAC_VS_EFF_MEMORY_CD4_TCELL_DN
GSE12392_CD8A_POS_VS_NEG_SPLEEN_DC_DN	200	188	0.44	1.54	0.069246	0.099443	https://www.gsea-msigdb.org/gsea/msigdb/human/geneset/GSE12392_CD8A_POS_VS_NEG_SPLEEN_DC_DN
GOLDRATH_NAIVE_VS_EFF_CD8_TCELL_DN	200	191	0.47	1.54	0.10934	0.099412	https://www.gsea-msigdb.org/gsea/msigdb/human/geneset/GOLDRATH_NAIVE_VS_EFF_CD8_TCELL_DN
GSE17301_IFNA2_VS_IFNA5_STIM_ACD3_ACD28_ACT_CD8_TCELL_DN	200	186	0.43	1.54	0.078313	0.099517	https://www.gsea-msigdb.org/gsea/msigdb/human/geneset/GSE17301_IFNA2_VS_IFNA5_STIM_ACD3_ACD28_ACT_CD8_TCELL_DN
GSE17721_LPS_VS_GARDIQUIMOD_24H_BMDC_DN	200	183	0.42	1.54	0.032454	0.099731	https://www.gsea-msigdb.org/gsea/msigdb/human/geneset/GSE17721_LPS_VS_GARDIQUIMOD_24H_BMDC_DN
GSE43955_TH0_VS_TGFB_IL6_TH17_ACT_CD4_TCELL_60H_UP	200	196	0.35	1.54	0.0078895	0.099755	https://www.gsea-msigdb.org/gsea/msigdb/human/geneset/GSE43955_TH0_VS_TGFB_IL6_TH17_ACT_CD4_TCELL_60H_UP
GSE17301_CTRL_VS_48H_ACD3_ACD28_STIM_CD8_TCELL_UP	200	185	0.36	1.54	0.017341	0.099936	https://www.gsea-msigdb.org/gsea/msigdb/human/geneset/GSE17301_CTRL_VS_48H_ACD3_ACD28_STIM_CD8_TCELL_UP
GSE24574_BCL6_LOW_TFH_VS_NAIVE_CD4_TCELL_DN	197	184	0.32	1.54	0	0.099905	https://www.gsea-msigdb.org/gsea/msigdb/human/geneset/GSE24574_BCL6_LOW_TFH_VS_NAIVE_CD4_TCELL_DN
GSE22886_TH1_VS_TH2_12H_ACT_UP	199	186	0.34	1.54	0.0059055	0.099869	https://www.gsea-msigdb.org/gsea/msigdb/human/geneset/GSE22886_TH1_VS_TH2_12H_ACT_UP
GSE45365_NK_CELL_VS_CD8A_DC_MCMV_INFECTION_UP	195	179	0.35	1.54	0.011299	0.10019	https://www.gsea-msigdb.org/gsea/msigdb/human/geneset/GSE45365_NK_CELL_VS_CD8A_DC_MCMV_INFECTION_UP
GSE7852_THYMUS_VS_FAT_TCONV_DN	200	188	0.38	1.54	0.01992	0.10048	https://www.gsea-msigdb.org/gsea/msigdb/human/geneset/GSE7852_THYMUS_VS_FAT_TCONV_DN
GSE17301_CTRL_VS_48H_ACD3_ACD28_IFNA2_STIM_CD8_TCELL_DN	200	184	0.39	1.54	0.042718	0.10055	https://www.gsea-msigdb.org/gsea/msigdb/human/geneset/GSE17301_CTRL_VS_48H_ACD3_ACD28_IFNA2_STIM_CD8_TCELL_DN
GSE9037_CTRL_VS_LPS_1H_STIM_IRAK4_KO_BMDM_DN	200	183	0.36	1.54	0.017787	0.10048	https://www.gsea-msigdb.org/gsea/msigdb/human/geneset/GSE9037_CTRL_VS_LPS_1H_STIM_IRAK4_KO_BMDM_DN
GSE17721_POLYIC_VS_PAM3CSK4_24H_BMDC_DN	199	185	0.43	1.54	0.02621	0.10054	https://www.gsea-msigdb.org/gsea/msigdb/human/geneset/GSE17721_POLYIC_VS_PAM3CSK4_24H_BMDC_DN
GSE22886_DAY0_VS_DAY7_MONOCYTE_IN_CULTURE_UP	199	185	0.43	1.53	0.046243	0.10066	https://www.gsea-msigdb.org/gsea/msigdb/human/geneset/GSE22886_DAY0_VS_DAY7_MONOCYTE_IN_CULTURE_UP
GSE20727_CTRL_VS_ROS_INH_AND_DNFB_ALLERGEN_TREATED_DC_DN	197	178	0.5	1.53	0.071138	0.10082	https://www.gsea-msigdb.org/gsea/msigdb/human/geneset/GSE20727_CTRL_VS_ROS_INH_AND_DNFB_ALLERGEN_TREATED_DC_DN
GSE22611_NOD2_TRANSDUCED_VS_CTRL_HEK293T_STIMULATED_WITH_MDP_2H_DN	183	174	0.43	1.53	0.061265	0.10112	https://www.gsea-msigdb.org/gsea/msigdb/human/geneset/GSE22611_NOD2_TRANSDUCED_VS_CTRL_HEK293T_STIMULATED_WITH_MDP_2H_DN
GSE4984_GALECTIN1_VS_VEHICLE_CTRL_TREATED_DC_DN	199	189	0.44	1.53	0.038384	0.10115	https://www.gsea-msigdb.org/gsea/msigdb/human/geneset/GSE4984_GALECTIN1_VS_VEHICLE_CTRL_TREATED_DC_DN
GSE39820_CTRL_VS_IL1B_IL6_CD4_TCELL_DN	200	189	0.38	1.53	0.017928	0.10115	https://www.gsea-msigdb.org/gsea/msigdb/human/geneset/GSE39820_CTRL_VS_IL1B_IL6_CD4_TCELL_DN
GSE21033_CTRL_VS_POLYIC_STIM_DC_24H_UP	157	147	0.4	1.53	0.035714	0.10115	https://www.gsea-msigdb.org/gsea/msigdb/human/geneset/GSE21033_CTRL_VS_POLYIC_STIM_DC_24H_UP
GSE26669_CD4_VS_CD8_TCELL_IN_MLR_COSTIM_BLOCK_DN	199	186	0.36	1.53	0.0019685	0.10111	https://www.gsea-msigdb.org/gsea/msigdb/human/geneset/GSE26669_CD4_VS_CD8_TCELL_IN_MLR_COSTIM_BLOCK_DN
GSE20151_CTRL_VS_FUSOBACT_NUCLEATUM_NEUTROPHIL_UP	198	189	0.39	1.53	0.013109	0.10142	https://www.gsea-msigdb.org/gsea/msigdb/human/geneset/GSE20151_CTRL_VS_FUSOBACT_NUCLEATUM_NEUTROPHIL_UP
GSE24634_TEFF_VS_TCONV_DAY7_IN_CULTURE_UP	200	192	0.5	1.53	0.13861	0.10161	https://www.gsea-msigdb.org/gsea/msigdb/human/geneset/GSE24634_TEFF_VS_TCONV_DAY7_IN_CULTURE_UP
GSE29618_PRE_VS_DAY7_POST_TIV_FLU_VACCINE_MDC_DN	198	186	0.33	1.53	0.001912	0.10185	https://www.gsea-msigdb.org/gsea/msigdb/human/geneset/GSE29618_PRE_VS_DAY7_POST_TIV_FLU_VACCINE_MDC_DN
GSE3039_CD4_TCELL_VS_B2_BCELL_UP	200	185	0.35	1.53	0.0057034	0.1018	https://www.gsea-msigdb.org/gsea/msigdb/human/geneset/GSE3039_CD4_TCELL_VS_B2_BCELL_UP
GSE22342_CD11C_HIGH_VS_LOW_DECIDUAL_MACROPHAGES_DN	195	164	0.34	1.53	0.010791	0.10175	https://www.gsea-msigdb.org/gsea/msigdb/human/geneset/GSE22342_CD11C_HIGH_VS_LOW_DECIDUAL_MACROPHAGES_DN
GSE37301_PRO_BCELL_VS_RAG2_KO_NK_CELL_DN	179	172	0.34	1.53	0.012024	0.10203	https://www.gsea-msigdb.org/gsea/msigdb/human/geneset/GSE37301_PRO_BCELL_VS_RAG2_KO_NK_CELL_DN
GSE29618_BCELL_VS_MONOCYTE_UP	195	173	0.44	1.53	0.076768	0.10205	https://www.gsea-msigdb.org/gsea/msigdb/human/geneset/GSE29618_BCELL_VS_MONOCYTE_UP
GSE25846_IL10_POS_VS_NEG_CD8_TCELL_DAY7_POST_CORONAVIRUS_BRAIN_UP	195	187	0.32	1.53	0	0.10216	https://www.gsea-msigdb.org/gsea/msigdb/human/geneset/GSE25846_IL10_POS_VS_NEG_CD8_TCELL_DAY7_POST_CORONAVIRUS_BRAIN_UP
GSE40666_UNTREATED_VS_IFNA_STIM_EFFECTOR_CD8_TCELL_90MIN_UP	200	189	0.37	1.53	0.052427	0.10224	https://www.gsea-msigdb.org/gsea/msigdb/human/geneset/GSE40666_UNTREATED_VS_IFNA_STIM_EFFECTOR_CD8_TCELL_90MIN_UP
GSE29949_CD8_NEG_DC_SPLEEN_VS_CD8_POS_DC_SPLEEN_UP	199	191	0.34	1.53	0.0037951	0.10221	https://www.gsea-msigdb.org/gsea/msigdb/human/geneset/GSE29949_CD8_NEG_DC_SPLEEN_VS_CD8_POS_DC_SPLEEN_UP
GSE24634_TREG_VS_TCONV_POST_DAY10_IL4_CONVERSION_UP	199	190	0.51	1.53	0.082661	0.1022	https://www.gsea-msigdb.org/gsea/msigdb/human/geneset/GSE24634_TREG_VS_TCONV_POST_DAY10_IL4_CONVERSION_UP
GSE29618_PRE_VS_DAY7_POST_TIV_FLU_VACCINE_MONOCYTE_DN	199	187	0.37	1.53	0.0096899	0.10228	https://www.gsea-msigdb.org/gsea/msigdb/human/geneset/GSE29618_PRE_VS_DAY7_POST_TIV_FLU_VACCINE_MONOCYTE_DN
GSE21546_UNSTIM_VS_ANTI_CD3_STIM_DP_THYMOCYTES_DN	199	185	0.45	1.53	0.088296	0.10288	https://www.gsea-msigdb.org/gsea/msigdb/human/geneset/GSE21546_UNSTIM_VS_ANTI_CD3_STIM_DP_THYMOCYTES_DN
GSE30971_WBP7_HET_VS_KO_MACROPHAGE_2H_LPS_STIM_UP	200	194	0.41	1.53	0.033465	0.10294	https://www.gsea-msigdb.org/gsea/msigdb/human/geneset/GSE30971_WBP7_HET_VS_KO_MACROPHAGE_2H_LPS_STIM_UP
GSE9601_UNTREATED_VS_NFKB_INHIBITOR_TREATED_HCMV_INF_MONOCYTE_UP	165	147	0.31	1.53	0.0039063	0.10322	https://www.gsea-msigdb.org/gsea/msigdb/human/geneset/GSE9601_UNTREATED_VS_NFKB_INHIBITOR_TREATED_HCMV_INF_MONOCYTE_UP
GSE43955_1H_VS_60H_ACT_CD4_TCELL_UP	200	190	0.4	1.53	0.025243	0.10329	https://www.gsea-msigdb.org/gsea/msigdb/human/geneset/GSE43955_1H_VS_60H_ACT_CD4_TCELL_UP
GSE42724_NAIVE_VS_B1_BCELL_UP	200	187	0.36	1.53	0.004065	0.10345	https://www.gsea-msigdb.org/gsea/msigdb/human/geneset/GSE42724_NAIVE_VS_B1_BCELL_UP
GSE21360_NAIVE_VS_SECONDARY_MEMORY_CD8_TCELL_DN	177	165	0.39	1.53	0.042718	0.10338	https://www.gsea-msigdb.org/gsea/msigdb/human/geneset/GSE21360_NAIVE_VS_SECONDARY_MEMORY_CD8_TCELL_DN
GOLDRATH_EFF_VS_MEMORY_CD8_TCELL_UP	200	193	0.49	1.53	0.12008	0.10387	https://www.gsea-msigdb.org/gsea/msigdb/human/geneset/GOLDRATH_EFF_VS_MEMORY_CD8_TCELL_UP
GSE17721_CTRL_VS_POLYIC_8H_BMDC_DN	199	193	0.36	1.53	0.0039683	0.10383	https://www.gsea-msigdb.org/gsea/msigdb/human/geneset/GSE17721_CTRL_VS_POLYIC_8H_BMDC_DN
GSE20715_WT_VS_TLR4_KO_6H_OZONE_LUNG_UP	200	186	0.36	1.53	0.016293	0.10388	https://www.gsea-msigdb.org/gsea/msigdb/human/geneset/GSE20715_WT_VS_TLR4_KO_6H_OZONE_LUNG_UP
GSE26290_CTRL_VS_AKT_INHIBITOR_TREATED_ANTI_CD3_AND_IL2_STIM_CD8_TCELL_UP	197	191	0.35	1.53	0.018256	0.10406	https://www.gsea-msigdb.org/gsea/msigdb/human/geneset/GSE26290_CTRL_VS_AKT_INHIBITOR_TREATED_ANTI_CD3_AND_IL2_STIM_CD8_TCELL_UP
GSE27786_CD4_TCELL_VS_NKCELL_DN	200	191	0.39	1.53	0.019646	0.10438	https://www.gsea-msigdb.org/gsea/msigdb/human/geneset/GSE27786_CD4_TCELL_VS_NKCELL_DN
GSE32423_IL7_VS_IL7_IL4_MEMORY_CD8_TCELL_DN	199	187	0.37	1.53	0.034286	0.10448	https://www.gsea-msigdb.org/gsea/msigdb/human/geneset/GSE32423_IL7_VS_IL7_IL4_MEMORY_CD8_TCELL_DN
GSE24634_IL4_VS_CTRL_TREATED_NAIVE_CD4_TCELL_DAY3_UP	200	194	0.39	1.53	0.036122	0.10445	https://www.gsea-msigdb.org/gsea/msigdb/human/geneset/GSE24634_IL4_VS_CTRL_TREATED_NAIVE_CD4_TCELL_DAY3_UP
GSE9988_LOW_LPS_VS_CTRL_TREATED_MONOCYTE_UP	197	186	0.51	1.53	0.086	0.10454	https://www.gsea-msigdb.org/gsea/msigdb/human/geneset/GSE9988_LOW_LPS_VS_CTRL_TREATED_MONOCYTE_UP
GSE17721_12H_VS_24H_PAM3CSK4_BMDC_UP	200	187	0.39	1.53	0.023346	0.10489	https://www.gsea-msigdb.org/gsea/msigdb/human/geneset/GSE17721_12H_VS_24H_PAM3CSK4_BMDC_UP
GSE37301_COMMON_LYMPHOID_PROGENITOR_VS_RAG2_KO_NK_CELL_UP	195	189	0.34	1.53	0.0057034	0.10505	https://www.gsea-msigdb.org/gsea/msigdb/human/geneset/GSE37301_COMMON_LYMPHOID_PROGENITOR_VS_RAG2_KO_NK_CELL_UP
GSE28726_ACT_CD4_TCELL_VS_ACT_VA24NEG_NKTCELL_UP	200	195	0.49	1.53	0.064	0.10519	https://www.gsea-msigdb.org/gsea/msigdb/human/geneset/GSE28726_ACT_CD4_TCELL_VS_ACT_VA24NEG_NKTCELL_UP
GSE27786_BCELL_VS_CD8_TCELL_UP	200	188	0.36	1.52	0.012048	0.10581	https://www.gsea-msigdb.org/gsea/msigdb/human/geneset/GSE27786_BCELL_VS_CD8_TCELL_UP
GSE16450_IMMATURE_VS_MATURE_NEURON_CELL_LINE_DN	198	191	0.47	1.52	0.10526	0.10582	https://www.gsea-msigdb.org/gsea/msigdb/human/geneset/GSE16450_IMMATURE_VS_MATURE_NEURON_CELL_LINE_DN
GSE19401_NAIVE_VS_IMMUNIZED_MOUSE_PLN_FOLLICULAR_DC_DN	200	191	0.44	1.52	0.062136	0.10579	https://www.gsea-msigdb.org/gsea/msigdb/human/geneset/GSE19401_NAIVE_VS_IMMUNIZED_MOUSE_PLN_FOLLICULAR_DC_DN
GSE360_L_DONOVANI_VS_T_GONDII_DC_DN	197	185	0.36	1.52	0.032064	0.10574	https://www.gsea-msigdb.org/gsea/msigdb/human/geneset/GSE360_L_DONOVANI_VS_T_GONDII_DC_DN
GSE19941_UNSTIM_VS_LPS_AND_IL10_STIM_IL10_KO_NFKBP50_KO_MACROPHAGE_UP	174	156	0.33	1.52	0.0037313	0.10591	https://www.gsea-msigdb.org/gsea/msigdb/human/geneset/GSE19941_UNSTIM_VS_LPS_AND_IL10_STIM_IL10_KO_NFKBP50_KO_MACROPHAGE_UP
GSE32164_ALTERNATIVELY_ACT_M2_VS_CMYC_INHIBITED_MACROPHAGE_UP	200	192	0.42	1.52	0.058939	0.10687	https://www.gsea-msigdb.org/gsea/msigdb/human/geneset/GSE32164_ALTERNATIVELY_ACT_M2_VS_CMYC_INHIBITED_MACROPHAGE_UP
GSE28449_WT_VS_LRF_KO_GERMINAL_CENTER_BCELL_DN	197	184	0.33	1.52	0.0018622	0.10701	https://www.gsea-msigdb.org/gsea/msigdb/human/geneset/GSE28449_WT_VS_LRF_KO_GERMINAL_CENTER_BCELL_DN
GSE22886_UNSTIM_VS_IL2_STIM_NKCELL_DN	200	192	0.55	1.52	0.13163	0.1072	https://www.gsea-msigdb.org/gsea/msigdb/human/geneset/GSE22886_UNSTIM_VS_IL2_STIM_NKCELL_DN
GSE28726_ACT_CD4_TCELL_VS_ACT_NKTCELL_UP	200	194	0.48	1.52	0.068826	0.10763	https://www.gsea-msigdb.org/gsea/msigdb/human/geneset/GSE28726_ACT_CD4_TCELL_VS_ACT_NKTCELL_UP
GSE10325_LUPUS_BCELL_VS_LUPUS_MYELOID_UP	195	183	0.48	1.52	0.091816	0.10764	https://www.gsea-msigdb.org/gsea/msigdb/human/geneset/GSE10325_LUPUS_BCELL_VS_LUPUS_MYELOID_UP
GSE46606_UNSTIM_VS_CD40L_IL2_IL5_DAY3_STIMULATED_BCELL_DN	199	183	0.44	1.52	0.089109	0.10761	https://www.gsea-msigdb.org/gsea/msigdb/human/geneset/GSE46606_UNSTIM_VS_CD40L_IL2_IL5_DAY3_STIMULATED_BCELL_DN
GSE24574_BCL6_LOW_TFH_VS_TCONV_CD4_TCELL_DN	200	190	0.53	1.52	0.12277	0.10775	https://www.gsea-msigdb.org/gsea/msigdb/human/geneset/GSE24574_BCL6_LOW_TFH_VS_TCONV_CD4_TCELL_DN
GSE9006_TYPE_1_DIABETES_AT_DX_VS_1MONTH_POST_DX_PBMC_DN	197	182	0.38	1.52	0.035917	0.10776	https://www.gsea-msigdb.org/gsea/msigdb/human/geneset/GSE9006_TYPE_1_DIABETES_AT_DX_VS_1MONTH_POST_DX_PBMC_DN
GSE25088_IL4_VS_IL4_AND_ROSIGLITAZONE_STIM_MACROPHAGE_DAY10_DN	200	192	0.33	1.52	0	0.10771	https://www.gsea-msigdb.org/gsea/msigdb/human/geneset/GSE25088_IL4_VS_IL4_AND_ROSIGLITAZONE_STIM_MACROPHAGE_DAY10_DN
GSE41867_DAY8_EFFECTOR_VS_DAY30_EXHAUSTED_CD8_TCELL_LCMV_CLONE13_UP	199	187	0.44	1.52	0.054	0.10805	https://www.gsea-msigdb.org/gsea/msigdb/human/geneset/GSE41867_DAY8_EFFECTOR_VS_DAY30_EXHAUSTED_CD8_TCELL_LCMV_CLONE13_UP
GSE20366_EX_VIVO_VS_DEC205_CONVERSION_NAIVE_CD4_TCELL_UP	199	183	0.38	1.52	0.048	0.108	https://www.gsea-msigdb.org/gsea/msigdb/human/geneset/GSE20366_EX_VIVO_VS_DEC205_CONVERSION_NAIVE_CD4_TCELL_UP
GSE37301_GRANULOCYTE_MONOCYTE_PROGENITOR_VS_RAG2_KO_NK_CELL_DN	200	189	0.41	1.52	0.03125	0.10791	https://www.gsea-msigdb.org/gsea/msigdb/human/geneset/GSE37301_GRANULOCYTE_MONOCYTE_PROGENITOR_VS_RAG2_KO_NK_CELL_DN
GSE36888_STAT5_AB_KNOCKIN_VS_WT_TCELL_IL2_TREATED_17H_UP	199	185	0.39	1.52	0.018293	0.10791	https://www.gsea-msigdb.org/gsea/msigdb/human/geneset/GSE36888_STAT5_AB_KNOCKIN_VS_WT_TCELL_IL2_TREATED_17H_UP
GSE7460_TCONV_VS_TREG_THYMUS_DN	200	192	0.35	1.52	0.017822	0.10807	https://www.gsea-msigdb.org/gsea/msigdb/human/geneset/GSE7460_TCONV_VS_TREG_THYMUS_DN
GSE3982_MAC_VS_NEUTROPHIL_LPS_STIM_DN	195	182	0.34	1.52	0.0057143	0.1082	https://www.gsea-msigdb.org/gsea/msigdb/human/geneset/GSE3982_MAC_VS_NEUTROPHIL_LPS_STIM_DN
GSE40666_WT_VS_STAT4_KO_CD8_TCELL_WITH_IFNA_STIM_90MIN_DN	200	192	0.4	1.52	0.035088	0.10813	https://www.gsea-msigdb.org/gsea/msigdb/human/geneset/GSE40666_WT_VS_STAT4_KO_CD8_TCELL_WITH_IFNA_STIM_90MIN_DN
GSE17721_4_VS_24H_CPG_BMDC_UP	200	190	0.33	1.52	0.003937	0.10874	https://www.gsea-msigdb.org/gsea/msigdb/human/geneset/GSE17721_4_VS_24H_CPG_BMDC_UP
GSE43863_TH1_VS_TFH_EFFECTOR_CD4_TCELL_UP	200	183	0.31	1.52	0.0018149	0.10889	https://www.gsea-msigdb.org/gsea/msigdb/human/geneset/GSE43863_TH1_VS_TFH_EFFECTOR_CD4_TCELL_UP
GSE3039_NKT_CELL_VS_ALPHAALPHA_CD8_TCELL_UP	200	190	0.37	1.52	0.021654	0.10886	https://www.gsea-msigdb.org/gsea/msigdb/human/geneset/GSE3039_NKT_CELL_VS_ALPHAALPHA_CD8_TCELL_UP
GSE37533_UNTREATED_VS_PIOGLIZATONE_TREATED_CD4_TCELL_FOXP3_TRASDUCED_CD4_TCELL_DN	162	153	0.34	1.52	0.017341	0.10887	https://www.gsea-msigdb.org/gsea/msigdb/human/geneset/GSE37533_UNTREATED_VS_PIOGLIZATONE_TREATED_CD4_TCELL_FOXP3_TRASDUCED_CD4_TCELL_DN
GSE43863_DAY6_EFF_VS_DAY150_MEM_LY6C_INT_CXCR5POS_CD4_TCELL_DN	200	186	0.38	1.52	0.066414	0.10941	https://www.gsea-msigdb.org/gsea/msigdb/human/geneset/GSE43863_DAY6_EFF_VS_DAY150_MEM_LY6C_INT_CXCR5POS_CD4_TCELL_DN
GSE45365_NK_CELL_VS_CD8_TCELL_MCMV_INFECTION_UP	198	189	0.43	1.52	0.032	0.10997	https://www.gsea-msigdb.org/gsea/msigdb/human/geneset/GSE45365_NK_CELL_VS_CD8_TCELL_MCMV_INFECTION_UP
GSE11057_CD4_CENT_MEM_VS_PBMC_UP	198	184	0.41	1.52	0.047801	0.10989	https://www.gsea-msigdb.org/gsea/msigdb/human/geneset/GSE11057_CD4_CENT_MEM_VS_PBMC_UP
GSE11961_MEMORY_BCELL_DAY7_VS_GERMINAL_CENTER_BCELL_DAY7_DN	200	184	0.35	1.52	0.021782	0.10998	https://www.gsea-msigdb.org/gsea/msigdb/human/geneset/GSE11961_MEMORY_BCELL_DAY7_VS_GERMINAL_CENTER_BCELL_DAY7_DN
GSE14415_NATURAL_TREG_VS_TCONV_DN	180	171	0.49	1.52	0.13752	0.10998	https://www.gsea-msigdb.org/gsea/msigdb/human/geneset/GSE14415_NATURAL_TREG_VS_TCONV_DN
GSE20715_0H_VS_6H_OZONE_LUNG_UP	200	186	0.39	1.52	0.02907	0.10995	https://www.gsea-msigdb.org/gsea/msigdb/human/geneset/GSE20715_0H_VS_6H_OZONE_LUNG_UP
GSE25677_MPL_VS_R848_STIM_BCELL_DN	181	175	0.4	1.52	0.042424	0.11	https://www.gsea-msigdb.org/gsea/msigdb/human/geneset/GSE25677_MPL_VS_R848_STIM_BCELL_DN
GSE17721_0.5H_VS_24H_POLYIC_BMDC_UP	198	186	0.4	1.52	0.054475	0.11015	https://www.gsea-msigdb.org/gsea/msigdb/human/geneset/GSE17721_0.5H_VS_24H_POLYIC_BMDC_UP
GSE9946_IMMATURE_VS_LISTERIA_INF_MATURE_DC_DN	133	115	0.34	1.52	0.011858	0.11015	https://www.gsea-msigdb.org/gsea/msigdb/human/geneset/GSE9946_IMMATURE_VS_LISTERIA_INF_MATURE_DC_DN
GSE36826_WT_VS_IL1R_KO_SKIN_STAPH_AUREUS_INF_UP	200	186	0.52	1.52	0.11881	0.11009	https://www.gsea-msigdb.org/gsea/msigdb/human/geneset/GSE36826_WT_VS_IL1R_KO_SKIN_STAPH_AUREUS_INF_UP
GSE2770_UNTREATED_VS_ACT_CD4_TCELL_2H_UP	198	185	0.35	1.52	0.017476	0.11013	https://www.gsea-msigdb.org/gsea/msigdb/human/geneset/GSE2770_UNTREATED_VS_ACT_CD4_TCELL_2H_UP
GSE21360_NAIVE_VS_TERTIARY_MEMORY_CD8_TCELL_UP	196	183	0.37	1.52	0.019011	0.11006	https://www.gsea-msigdb.org/gsea/msigdb/human/geneset/GSE21360_NAIVE_VS_TERTIARY_MEMORY_CD8_TCELL_UP
GSE45365_NK_CELL_VS_BCELL_MCMV_INFECTION_UP	199	190	0.38	1.52	0.015504	0.11001	https://www.gsea-msigdb.org/gsea/msigdb/human/geneset/GSE45365_NK_CELL_VS_BCELL_MCMV_INFECTION_UP
GSE20484_MCSG_VS_CXCL4_MONOCYTE_DERIVED_MACROPHAGE_UP	199	184	0.39	1.52	0.023301	0.10994	https://www.gsea-msigdb.org/gsea/msigdb/human/geneset/GSE20484_MCSG_VS_CXCL4_MONOCYTE_DERIVED_MACROPHAGE_UP
GSE3982_EOSINOPHIL_VS_CENT_MEMORY_CD4_TCELL_UP	200	192	0.42	1.52	0.045908	0.10985	https://www.gsea-msigdb.org/gsea/msigdb/human/geneset/GSE3982_EOSINOPHIL_VS_CENT_MEMORY_CD4_TCELL_UP
GSE22432_MULTIPOTENT_PROGENITOR_VS_CDC_UP	199	182	0.36	1.52	0.030651	0.10994	https://www.gsea-msigdb.org/gsea/msigdb/human/geneset/GSE22432_MULTIPOTENT_PROGENITOR_VS_CDC_UP
GSE16266_CTRL_VS_LPS_STIM_MEF_UP	198	192	0.39	1.52	0.046693	0.11014	https://www.gsea-msigdb.org/gsea/msigdb/human/geneset/GSE16266_CTRL_VS_LPS_STIM_MEF_UP
GSE6092_IFNG_VS_IFNG_AND_B_BURGDORFERI_INF_ENDOTHELIAL_CELL_DN	175	165	0.41	1.52	0.056751	0.11012	https://www.gsea-msigdb.org/gsea/msigdb/human/geneset/GSE6092_IFNG_VS_IFNG_AND_B_BURGDORFERI_INF_ENDOTHELIAL_CELL_DN
GSE23114_PERITONEAL_CAVITY_B1A_BCELL_VS_SPLEEN_BCELL_IN_SLE2C1_MOUSE_DN	193	188	0.35	1.52	0.0039139	0.11023	https://www.gsea-msigdb.org/gsea/msigdb/human/geneset/GSE23114_PERITONEAL_CAVITY_B1A_BCELL_VS_SPLEEN_BCELL_IN_SLE2C1_MOUSE_DN
GSE360_CTRL_VS_B_MALAYI_LOW_DOSE_DC_UP	198	194	0.34	1.52	0.01711	0.11023	https://www.gsea-msigdb.org/gsea/msigdb/human/geneset/GSE360_CTRL_VS_B_MALAYI_LOW_DOSE_DC_UP
GSE14026_TH1_VS_TH17_UP	200	182	0.36	1.52	0.0076046	0.11044	https://www.gsea-msigdb.org/gsea/msigdb/human/geneset/GSE14026_TH1_VS_TH17_UP
GSE19888_ADENOSINE_A3R_ACT_VS_A3R_ACT_WITH_A3R_INH_PRETREATMENT_IN_MAST_CELL_DN	199	182	0.36	1.51	0.038986	0.11051	https://www.gsea-msigdb.org/gsea/msigdb/human/geneset/GSE19888_ADENOSINE_A3R_ACT_VS_A3R_ACT_WITH_A3R_INH_PRETREATMENT_IN_MAST_CELL_DN
GSE15659_CD45RA_NEG_CD4_TCELL_VS_RESTING_TREG_UP	195	175	0.33	1.51	0.0055762	0.11156	https://www.gsea-msigdb.org/gsea/msigdb/human/geneset/GSE15659_CD45RA_NEG_CD4_TCELL_VS_RESTING_TREG_UP
GSE29618_BCELL_VS_MDC_UP	194	177	0.43	1.51	0.087755	0.11174	https://www.gsea-msigdb.org/gsea/msigdb/human/geneset/GSE29618_BCELL_VS_MDC_UP
GSE22140_HEALTHY_VS_ARTHRITIC_GERMFREE_MOUSE_CD4_TCELL_UP	200	187	0.46	1.51	0.064579	0.1121	https://www.gsea-msigdb.org/gsea/msigdb/human/geneset/GSE22140_HEALTHY_VS_ARTHRITIC_GERMFREE_MOUSE_CD4_TCELL_UP
GSE40685_NAIVE_CD4_TCELL_VS_FOXP3_KO_TREG_PRECURSOR_DN	195	177	0.33	1.51	0.0037453	0.11212	https://www.gsea-msigdb.org/gsea/msigdb/human/geneset/GSE40685_NAIVE_CD4_TCELL_VS_FOXP3_KO_TREG_PRECURSOR_DN
GSE3920_UNTREATED_VS_IFNG_TREATED_FIBROBLAST_DN	179	169	0.35	1.51	0.025391	0.11263	https://www.gsea-msigdb.org/gsea/msigdb/human/geneset/GSE3920_UNTREATED_VS_IFNG_TREATED_FIBROBLAST_DN
GSE43955_1H_VS_42H_ACT_CD4_TCELL_UP	200	191	0.38	1.51	0.019608	0.11268	https://www.gsea-msigdb.org/gsea/msigdb/human/geneset/GSE43955_1H_VS_42H_ACT_CD4_TCELL_UP
GSE17721_CTRL_VS_GARDIQUIMOD_8H_BMDC_DN	200	189	0.36	1.51	0.017751	0.11317	https://www.gsea-msigdb.org/gsea/msigdb/human/geneset/GSE17721_CTRL_VS_GARDIQUIMOD_8H_BMDC_DN
GSE2128_C57BL6_VS_NOD_THYMOCYTE_DN	200	185	0.32	1.51	0.003861	0.11329	https://www.gsea-msigdb.org/gsea/msigdb/human/geneset/GSE2128_C57BL6_VS_NOD_THYMOCYTE_DN
GSE3982_EOSINOPHIL_VS_TH2_UP	195	191	0.32	1.51	0	0.11322	https://www.gsea-msigdb.org/gsea/msigdb/human/geneset/GSE3982_EOSINOPHIL_VS_TH2_UP
GSE9988_LPS_VS_CTRL_TREATED_MONOCYTE_UP	197	186	0.47	1.51	0.084479	0.11341	https://www.gsea-msigdb.org/gsea/msigdb/human/geneset/GSE9988_LPS_VS_CTRL_TREATED_MONOCYTE_UP
GSE15930_STIM_VS_STIM_AND_TRICHOSTATINA_48H_CD8_T_CELL_DN	200	190	0.4	1.51	0.047619	0.11333	https://www.gsea-msigdb.org/gsea/msigdb/human/geneset/GSE15930_STIM_VS_STIM_AND_TRICHOSTATINA_48H_CD8_T_CELL_DN
GSE10325_LUPUS_CD4_TCELL_VS_LUPUS_MYELOID_UP	199	180	0.43	1.51	0.082218	0.11384	https://www.gsea-msigdb.org/gsea/msigdb/human/geneset/GSE10325_LUPUS_CD4_TCELL_VS_LUPUS_MYELOID_UP
GSE14413_UNSTIM_VS_IFNB_STIM_L929_CELLS_DN	118	106	0.35	1.51	0.0036765	0.11386	https://www.gsea-msigdb.org/gsea/msigdb/human/geneset/GSE14413_UNSTIM_VS_IFNB_STIM_L929_CELLS_DN
GSE22025_UNTREATED_VS_PROGESTERONE_TREATED_CD4_TCELL_UP	198	191	0.33	1.51	0.016575	0.1139	https://www.gsea-msigdb.org/gsea/msigdb/human/geneset/GSE22025_UNTREATED_VS_PROGESTERONE_TREATED_CD4_TCELL_UP
GSE29618_PRE_VS_DAY7_FLU_VACCINE_MONOCYTE_UP	197	187	0.31	1.51	0	0.11388	https://www.gsea-msigdb.org/gsea/msigdb/human/geneset/GSE29618_PRE_VS_DAY7_FLU_VACCINE_MONOCYTE_UP
GSE30962_ACUTE_VS_CHRONIC_LCMV_PRIMARY_INF_CD8_TCELL_DN	200	194	0.45	1.51	0.084677	0.11396	https://www.gsea-msigdb.org/gsea/msigdb/human/geneset/GSE30962_ACUTE_VS_CHRONIC_LCMV_PRIMARY_INF_CD8_TCELL_DN
GSE22033_UNTREATED_VS_ROSIGLITAZONE_TREATED_MEF_DN	199	185	0.37	1.51	0.019646	0.11418	https://www.gsea-msigdb.org/gsea/msigdb/human/geneset/GSE22033_UNTREATED_VS_ROSIGLITAZONE_TREATED_MEF_DN
GSE28408_LY6G_POS_VS_NEG_DC_DN	200	189	0.46	1.51	0.093933	0.11421	https://www.gsea-msigdb.org/gsea/msigdb/human/geneset/GSE28408_LY6G_POS_VS_NEG_DC_DN
GSE15330_HSC_VS_MEGAKARYOCYTE_ERYTHROID_PROGENITOR_IKAROS_KO_UP	200	192	0.39	1.51	0.016194	0.11453	https://www.gsea-msigdb.org/gsea/msigdb/human/geneset/GSE15330_HSC_VS_MEGAKARYOCYTE_ERYTHROID_PROGENITOR_IKAROS_KO_UP
GSE41867_LCMV_ARMSTRONG_VS_CLONE13_DAY8_EFFECTOR_CD8_TCELL_UP	200	186	0.38	1.51	0.0098814	0.11456	https://www.gsea-msigdb.org/gsea/msigdb/human/geneset/GSE41867_LCMV_ARMSTRONG_VS_CLONE13_DAY8_EFFECTOR_CD8_TCELL_UP
GSE12484_HEALTHY_VS_PERIDONTITIS_NEUTROPHILS_DN	152	146	0.35	1.51	0.019763	0.11449	https://www.gsea-msigdb.org/gsea/msigdb/human/geneset/GSE12484_HEALTHY_VS_PERIDONTITIS_NEUTROPHILS_DN
GSE26488_WT_VS_VP16_TRANSGENIC_HDAC7_KO_DOUBLE_POSITIVE_THYMOCYTE_DN	170	160	0.36	1.51	0.044487	0.11445	https://www.gsea-msigdb.org/gsea/msigdb/human/geneset/GSE26488_WT_VS_VP16_TRANSGENIC_HDAC7_KO_DOUBLE_POSITIVE_THYMOCYTE_DN
GSE21927_SPLEEN_VS_TUMOR_MONOCYTE_BALBC_UP	192	172	0.31	1.51	0.0040733	0.11494	https://www.gsea-msigdb.org/gsea/msigdb/human/geneset/GSE21927_SPLEEN_VS_TUMOR_MONOCYTE_BALBC_UP
GSE14699_DELETIONAL_TOLERANCE_VS_ACTIVATED_CD8_TCELL_DN	185	174	0.46	1.51	0.11719	0.1152	https://www.gsea-msigdb.org/gsea/msigdb/human/geneset/GSE14699_DELETIONAL_TOLERANCE_VS_ACTIVATED_CD8_TCELL_DN
GSE7460_WT_VS_FOXP3_HET_ACT_WITH_TGFB_TCONV_DN	199	188	0.35	1.51	0.018443	0.11518	https://www.gsea-msigdb.org/gsea/msigdb/human/geneset/GSE7460_WT_VS_FOXP3_HET_ACT_WITH_TGFB_TCONV_DN
GSE3203_INFLUENZA_INF_VS_IFNB_TREATED_LN_BCELL_UP	200	186	0.29	1.51	0	0.11562	https://www.gsea-msigdb.org/gsea/msigdb/human/geneset/GSE3203_INFLUENZA_INF_VS_IFNB_TREATED_LN_BCELL_UP
GSE9006_TYPE_1_DIABETES_AT_DX_VS_4MONTH_POST_DX_PBMC_UP	200	193	0.48	1.51	0.074447	0.11566	https://www.gsea-msigdb.org/gsea/msigdb/human/geneset/GSE9006_TYPE_1_DIABETES_AT_DX_VS_4MONTH_POST_DX_PBMC_UP
GSE32164_RESTING_DIFFERENTIATED_VS_CMYC_INHIBITED_MACROPHAGE_DN	200	192	0.41	1.51	0.05395	0.11564	https://www.gsea-msigdb.org/gsea/msigdb/human/geneset/GSE32164_RESTING_DIFFERENTIATED_VS_CMYC_INHIBITED_MACROPHAGE_DN
GSE40274_CTRL_VS_SATB1_TRANSDUCED_ACTIVATED_CD4_TCELL_UP	169	159	0.37	1.51	0.037879	0.11602	https://www.gsea-msigdb.org/gsea/msigdb/human/geneset/GSE40274_CTRL_VS_SATB1_TRANSDUCED_ACTIVATED_CD4_TCELL_UP
GSE45739_UNSTIM_VS_ACD3_ACD28_STIM_NRAS_KO_CD4_TCELL_DN	199	186	0.38	1.51	0.056093	0.11602	https://www.gsea-msigdb.org/gsea/msigdb/human/geneset/GSE45739_UNSTIM_VS_ACD3_ACD28_STIM_NRAS_KO_CD4_TCELL_DN
GSE13522_CTRL_VS_T_CRUZI_Y_STRAIN_INF_SKIN_IFNG_KO_DN	140	126	0.34	1.51	0.014898	0.11612	https://www.gsea-msigdb.org/gsea/msigdb/human/geneset/GSE13522_CTRL_VS_T_CRUZI_Y_STRAIN_INF_SKIN_IFNG_KO_DN
